# Supplementary material for: Unveiling the transcriptomic complexity of Miscanthus sinensis using a combination of PacBio long read- and Illumina short read sequencing platforms
Source: Research Square preprint supplement (doi:10.21203/rs.3.rs-44130/v2), 2020-12-31
Supplement: Supplementary file 1 [file 4017c5f8bc353ffbe5504d27.xlsx]

## Sheet: Lignin related genes
Additional file 2: Identification of the cell wall related genes and their representitive transcripts
Cell wall related gene family	Transcript ID	NR annotation	Query coverage (%)	Align length	Identity	E-value
Phenylalanine ammonia-lyase (PAL)	c62_g1	gi|222154091|gb|ACM47229.1| phenylalanine ammonia-lyase [Phyllostachys edulis] gi|222154093|gb|ACM47230.1| phenylalanine ammonia-lyase [Phyllostachys edulis]	36.94	792	60.22	5.25223e-98
	c808_g1	gi|514796912|ref|XP_004973667.1| PREDICTED: phenylalanine/tyrosine ammonia-lyase [Setaria italica] gi|944237826|gb|KQL02164.1| hypothetical protein SETIT_013348mg [Setaria italica]	93.41	2088	39.97	8.83349e-65
	c3567_g1	gi|293332887|ref|NP_001168086.1| phenylalanine ammonia-lyase [Zea mays] gi|223945919|gb|ACN27043.1| unknown [Zea mays] gi|413937862|gb|AFW72413.1| phenylalanine ammonia-lyase [Zea mays]	42.1	927	50.77	3.18768e-106
	c6095_g1	gi|871494|emb|CAA61198.1| phenylalanine ammonia-lyase [Oryza sativa Indica Group]	26.48	570	54.85	3.75937e-133
	c6344_g1	gi|38569936|gb|AAR24505.1| phenylalanine ammonia-lyase [Bambusa oldhamii] gi|260103374|gb|ACX31738.1| phenylalanine ammonia-lyase 1 [Bambusa oldhamii]	70.08	1545	44.57	8.48838e-138
	c6365_g1	gi|472320340|gb|AGI37887.1| phenylalanine ammonia-lyase [Saccharum hybrid cultivar CP69-1062]	100	2184	37.6	1.63382e-49
	c9029_g1	gi|670397377|ref|XP_008678828.1| PREDICTED: LOW QUALITY PROTEIN: phenylalanine/tyrosine ammonia-lyase-like [Zea mays]	55.11	1185	53.22	5.591e-128
	c10859_g1	gi|475518517|gb|EMT06206.1| Phenylalanine ammonia-lyase [Aegilops tauschii]	62.43	1413	37.55	2.61384e-91
	c11760_g1	gi|121615560|gb|ABM63378.1| phenylalanine ammonia-lyase [Saccharum officinarum]	24.54	471	59.2	0
	c14646_g1	gi|75161316|sp|Q8VXG7.1|PALY_MAIZE RecName: Full=Phenylalanine/tyrosine ammonia-lyase; AltName: Full=Bifunctional phenylalanine ammonia-lyase; Short=Bifunctional PAL gi|17467274|gb|AAL40137.1|L77912_1 phenylalanine ammonia-lyase [Zea mays]	75.11	1620	48.18	3.01707e-100
	c14699_g1	gi|557375993|gb|AGZ95689.1| phenylalanine ammonia-lyase [Cenchrus purpureus]	62.92	1413	36.36	1.53244e-41
	c14758_g1	gi|475525671|gb|EMT07187.1| Phenylalanine ammonia-lyase [Aegilops tauschii]	61.35	1779	34.44	1.52352e-94
	c20279_g1	gi|121615560|gb|ABM63378.1| phenylalanine ammonia-lyase [Saccharum officinarum]	46.24	978	99.08	0
	c20732_g1	gi|475626370|gb|EMT33318.1| Phenylalanine ammonia-lyase [Aegilops tauschii]	92.59	1590	42.09	4.19572e-70
	c20857_g1	gi|475611579|gb|EMT28134.1| Phenylalanine ammonia-lyase [Aegilops tauschii]	60.25	1338	47.58	7.8097e-129
	c21484_g1	gi|514715071|ref|XP_004953154.1| PREDICTED: phenylalanine ammonia-lyase-like [Setaria italica] gi|944266328|gb|KQL30568.1| hypothetical protein SETIT_016467mg [Setaria italica]	19.08	417	88.49	1.64991e-66
	c27310_g1	gi|224760831|gb|ACN62413.1| phenylalanine ammonia-lyase [Bambusa oldhamii] gi|260103376|gb|ACX31739.1| phenylalanine ammonia-lyase 2 [Bambusa oldhamii]	35.48	789	39.34	4.90309e-72
	c28700_g1	gi|514715067|ref|XP_004953153.1| PREDICTED: phenylalanine/tyrosine ammonia-lyase-like [Setaria italica] gi|944266327|gb|KQL30567.1| hypothetical protein SETIT_016504mg [Setaria italica]	18.62	402	53.74	8.49271e-48
	c29109_g1	gi|475529359|gb|EMT07760.1| Phenylalanine ammonia-lyase [Aegilops tauschii]	97.9	2247	36.53	3.91668e-72
	c29453_g1	gi|1002245089|ref|XP_015626729.1| PREDICTED: phenylalanine ammonia-lyase [Oryza sativa Japonica Group] gi|122171146|sp|Q0DZE0.1|PAL2_ORYSJ RecName: Full=Phenylalanine ammonia-lyase gi|48716552|dbj|BAD23155.1| putative phenylalanine ammonia-lyase [Oryza sativa Japonica Group] gi|113537015|dbj|BAF09398.1| Os02g0627100 [Oryza sativa Japonica Group] gi|125582945|gb|EAZ23876.1| hypothetical protein Os…	46	1014	46.02	2.11194e-132
	c32913_g1	gi|260600464|gb|ACX47015.1| phenylalanine ammonia-lyase [Avena sativa]	29.09	633	49.53	4.97025e-90
	c33468_g1	gi|121615560|gb|ABM63378.1| phenylalanine ammonia-lyase [Saccharum officinarum]	54.04	1149	46.97	1.28158e-71
	c35205_g1	gi|175050408|gb|ABP96954.2| phenylalanine ammonia-lyase, partial [Phyllostachys edulis]	44.46	972	57.41	0
	c37344_g1	gi|514715067|ref|XP_004953153.1| PREDICTED: phenylalanine/tyrosine ammonia-lyase-like [Setaria italica] gi|944266327|gb|KQL30567.1| hypothetical protein SETIT_016504mg [Setaria italica]	56.3	1236	43.29	2.90132e-53
	c39448_g1	gi|1002258819|ref|XP_015633749.1| PREDICTED: phenylalanine ammonia-lyase [Oryza sativa Japonica Group] gi|32487855|emb|CAE05623.1| OSJNBb0061C13.5 [Oryza sativa Japonica Group] gi|38568069|emb|CAE05458.3| OSJNBa0073E02.18 [Oryza sativa Japonica Group] gi|113564897|dbj|BAF15240.1| Os04g0518400 [Oryza sativa Japonica Group] gi|116310222|emb|CAH67232.1| OSIGBa0145M07.14 [Oryza sativa Indica Group] g…	25.35	555	70.27	3.62973e-116
	c39655_g1	gi|821595499|ref|NP_001105334.2| phenylalanine/tyrosine ammonia-lyase [Zea mays] gi|219886341|gb|ACL53545.1| unknown [Zea mays] gi|413937858|gb|AFW72409.1| phenylalanine ammonia lyase-like protein [Zea mays]	69.27	1542	42.5	3.17246e-61
	c41756_g1	gi|514715071|ref|XP_004953154.1| PREDICTED: phenylalanine ammonia-lyase-like [Setaria italica] gi|944266328|gb|KQL30568.1| hypothetical protein SETIT_016467mg [Setaria italica]	77.72	1788	36.41	1.01766e-71
	c44513_g1	gi|121615560|gb|ABM63378.1| phenylalanine ammonia-lyase [Saccharum officinarum]	55.04	1191	48.11	2.27609e-68
	c45509_g1	gi|514715067|ref|XP_004953153.1| PREDICTED: phenylalanine/tyrosine ammonia-lyase-like [Setaria italica] gi|944266327|gb|KQL30567.1| hypothetical protein SETIT_016504mg [Setaria italica]	56.73	1260	40.9	3.99834e-78
	c47041_g1	gi|514715071|ref|XP_004953154.1| PREDICTED: phenylalanine ammonia-lyase-like [Setaria italica] gi|944266328|gb|KQL30568.1| hypothetical protein SETIT_016467mg [Setaria italica]	5.57	93	72.5	1.87353e-15
	c47089_g1	gi|557375993|gb|AGZ95689.1| phenylalanine ammonia-lyase [Cenchrus purpureus]	82.92	1878	41.28	2.79105e-81
	c51705_g1	gi|121615560|gb|ABM63378.1| phenylalanine ammonia-lyase [Saccharum officinarum]	61.42	1290	47.98	4.35077e-118
	c52538_g1	gi|194704554|gb|ACF86361.1| unknown [Zea mays] gi|223943207|gb|ACN25687.1| unknown [Zea mays] gi|223947609|gb|ACN27888.1| unknown [Zea mays] gi|224031235|gb|ACN34693.1| unknown [Zea mays] gi|413923135|gb|AFW63067.1| phenylalanine ammonia-lyase [Zea mays]	81.89	1926	39.17	4.10405e-70
	c54677_g1	gi|514802696|ref|XP_004976240.1| PREDICTED: phenylalanine ammonia-lyase-like [Setaria italica] gi|944233753|gb|KQK98115.1| hypothetical protein SETIT_009509mg [Setaria italica]	96.86	2139	37.62	3.22234e-85
	c54991_g1	gi|195649503|gb|ACG44219.1| phenylalanine ammonia-lyase [Zea mays]	55.9	1185	52.75	0
	c56051_g1	gi|121615560|gb|ABM63378.1| phenylalanine ammonia-lyase [Saccharum officinarum]	48.37	1074	46.58	7.61259e-49
	c57998_g1	gi|222154091|gb|ACM47229.1| phenylalanine ammonia-lyase [Phyllostachys edulis] gi|222154093|gb|ACM47230.1| phenylalanine ammonia-lyase [Phyllostachys edulis]	44.38	1050	38.4	8.63123e-44
	c61436_g1	gi|514715075|ref|XP_004953155.1| PREDICTED: phenylalanine ammonia-lyase-like [Setaria italica] gi|944266329|gb|KQL30569.1| hypothetical protein SETIT_019385mg [Setaria italica]	48.95	1053	57.42	8.83572e-175
	c63357_g1	gi|149392343|gb|ABR25996.1| phenylalanine ammonia-lyase, partial [Oryza sativa Indica Group]	77.96	435	100	2.34199e-100
	c66030_g1	gi|1002241725|ref|XP_015625125.1| PREDICTED: phenylalanine ammonia-lyase [Oryza sativa Japonica Group] gi|48716548|dbj|BAD23151.1| putative phenylalanine ammonia-lyase [Oryza sativa Japonica Group] gi|113537013|dbj|BAF09396.1| Os02g0626400 [Oryza sativa Japonica Group] gi|125582943|gb|EAZ23874.1| hypothetical protein OsJ_07593 [Oryza sativa Japonica Group] gi|215767658|dbj|BAG99886.1| unnamed pro…	16.85	366	78.69	3.50164e-110
	c66132_g1	gi|365268965|gb|AEW70715.1| phenylalanine ammonia-lyase [Phyllostachys edulis]	87.59	1959	36.55	6.89597e-60
	c67552_g1	gi|557375993|gb|AGZ95689.1| phenylalanine ammonia-lyase [Cenchrus purpureus]	60.42	1359	52.06	3.37546e-89
	c67797_g1	gi|475607422|gb|EMT26706.1| Phenylalanine ammonia-lyase [Aegilops tauschii]	65.39	1227	40.05	1.15234e-54
	c74514_g1	gi|514715079|ref|XP_004953156.1| PREDICTED: phenylalanine ammonia-lyase [Setaria italica] gi|944266330|gb|KQL30570.1| hypothetical protein SETIT_016478mg [Setaria italica]	74.61	1680	43.25	1.59359e-113
	c74888_g1	gi|62736192|gb|AAX97448.1| putative phenylalanine ammonia-lyase [Bambusa ventricosa]	42.89	1095	34.29	5.71313e-52
	c74917_g1	gi|62736192|gb|AAX97448.1| putative phenylalanine ammonia-lyase [Bambusa ventricosa]	38.5	945	50.63	1.87666e-70
	c75738_g1	gi|195649503|gb|ACG44219.1| phenylalanine ammonia-lyase [Zea mays]	43.39	924	69.03	0
	c81517_g1	gi|222138141|gb|ACM45573.1| phenylalanine ammonia-lyase [Phyllostachys prominens] gi|222138145|gb|ACM45575.1| phenylalanine ammonia-lyase [Phyllostachys prominens]	50.28	1089	47.59	5.90973e-155
	c84988_g1	gi|222138174|gb|ACM45589.1| phenylalanine ammonia-lyase [Phyllostachys angusta] gi|222138180|gb|ACM45592.1| phenylalanine ammonia-lyase [Phyllostachys angusta]	34.55	765	48.66	4.49772e-80
	c92865_g1	gi|357150279|ref|XP_003575404.1| PREDICTED: phenylalanine ammonia-lyase-like [Brachypodium distachyon] gi|944064826|gb|KQK00417.1| hypothetical protein BRADI_3g49280 [Brachypodium distachyon]	47.61	1035	57.64	2.37387e-119
	c93411_g1	gi|573919869|ref|XP_006647543.1| PREDICTED: phenylalanine ammonia-lyase-like [Oryza brachyantha]	13.27	333	47.75	3.98934e-11
	c93796_g1	gi|121615560|gb|ABM63378.1| phenylalanine ammonia-lyase [Saccharum officinarum]	89.08	1902	57.72	2.74462e-179
	c94295_g1	gi|537845450|gb|AGU91428.1| phenylalanine ammonia-lyase [Chrysanthemum boreale]	50.35	1065	35.53	7.49982e-57
	c96307_g1	gi|871494|emb|CAA61198.1| phenylalanine ammonia-lyase [Oryza sativa Indica Group]	81.83	1881	37.07	7.21796e-51
	c97301_g1	gi|357150254|ref|XP_003575396.1| PREDICTED: phenylalanine ammonia-lyase [Brachypodium distachyon] gi|944064823|gb|KQK00414.1| hypothetical protein BRADI_3g49250 [Brachypodium distachyon]	79.92	1788	40.75	1.97615e-95
	c98917_g1	gi|475529359|gb|EMT07760.1| Phenylalanine ammonia-lyase [Aegilops tauschii]	8.68	213	56.34	2.39638e-39
	c101917_g1	gi|573919869|ref|XP_006647543.1| PREDICTED: phenylalanine ammonia-lyase-like [Oryza brachyantha]	82.54	1890	34.97	3.97016e-79
	c102007_g1	gi|426264366|gb|AFY17067.1| phenylalanine/tyrosine ammonia-lyase 1 [Panicum virgatum]	81.6	1752	43.22	7.80574e-101
	c103424_g1	gi|514715071|ref|XP_004953154.1| PREDICTED: phenylalanine ammonia-lyase-like [Setaria italica] gi|944266328|gb|KQL30568.1| hypothetical protein SETIT_016467mg [Setaria italica]	83.01	1836	43.74	5.05042e-97
	c107160_g1	gi|121615560|gb|ABM63378.1| phenylalanine ammonia-lyase [Saccharum officinarum]	76.17	1677	38.73	1.83497e-60
	c109132_g1	gi|514715067|ref|XP_004953153.1| PREDICTED: phenylalanine/tyrosine ammonia-lyase-like [Setaria italica] gi|944266327|gb|KQL30567.1| hypothetical protein SETIT_016504mg [Setaria italica]	60.17	1332	39.43	1.69055e-55
	c109524_g1	gi|474318464|gb|EMS62198.1| Phenylalanine ammonia-lyase [Triticum urartu]	57.68	1305	36.52	1.14059e-38
	c109783_g1	gi|121615560|gb|ABM63378.1| phenylalanine ammonia-lyase [Saccharum officinarum]	61.28	1380	45.06	6.95255e-69
	c111929_g1	gi|408777485|gb|AFU90757.1| phenylalanine ammonia-lyase [Epimedium sagittatum]	56.28	1236	41.07	5.09598e-59
	c114855_g1	gi|514802696|ref|XP_004976240.1| PREDICTED: phenylalanine ammonia-lyase-like [Setaria italica] gi|944233753|gb|KQK98115.1| hypothetical protein SETIT_009509mg [Setaria italica]	29.24	618	57.97	3.17969e-99
	c116889_g1	gi|175050408|gb|ABP96954.2| phenylalanine ammonia-lyase, partial [Phyllostachys edulis]	73.91	1596	37.52	9.75163e-118
	c119146_g1	gi|195649503|gb|ACG44219.1| phenylalanine ammonia-lyase [Zea mays]	36.98	810	51.26	6.12486e-127
	c121732_g1	gi|659096694|ref|XP_008449236.1| PREDICTED: phenylalanine ammonia-lyase-like [Cucumis melo]	59.86	1290	40	4.33679e-78
	c127768_g1	gi|291500673|gb|ADE08261.1| phenylalanine ammonia-lyase 4 [Bambusa oldhamii] gi|291500675|gb|ADE08262.1| phenylalanine ammonia-lyase 4 [Bambusa oldhamii]	34.09	726	55.79	1.33801e-155
	c137608_g1	gi|514715071|ref|XP_004953154.1| PREDICTED: phenylalanine ammonia-lyase-like [Setaria italica] gi|944266328|gb|KQL30568.1| hypothetical protein SETIT_016467mg [Setaria italica]	82.31	1851	37.38	7.65471e-75
	c142786_g1	gi|821595499|ref|NP_001105334.2| phenylalanine/tyrosine ammonia-lyase [Zea mays] gi|219886341|gb|ACL53545.1| unknown [Zea mays] gi|413937858|gb|AFW72409.1| phenylalanine ammonia lyase-like protein [Zea mays]	92.75	2028	40.31	1.6356e-89
	c144046_g1	gi|293332887|ref|NP_001168086.1| phenylalanine ammonia-lyase [Zea mays] gi|223945919|gb|ACN27043.1| unknown [Zea mays] gi|413937862|gb|AFW72413.1| phenylalanine ammonia-lyase [Zea mays]	57.76	1233	96.37	0
	c145244_g1	gi|224033609|gb|ACN35880.1| unknown [Zea mays] gi|413923136|gb|AFW63068.1| phenylalanine ammonia-lyase [Zea mays]	42.88	924	63.41	0
	c153276_g1	gi|573940233|ref|XP_006652523.1| PREDICTED: phenylalanine ammonia-lyase isoform X2 [Oryza brachyantha] gi|1002851702|ref|XP_015691636.1| PREDICTED: phenylalanine ammonia-lyase isoform X1 [Oryza brachyantha]	48.46	1053	40.92	3.43224e-75
	c156046_g1	gi|530279291|gb|AGT17138.1| phenylalanine ammonia-lyase [Saccharum hybrid cultivar R570]	71.27	1563	41.51	4.26961e-92
	c159106_g1	gi|195649503|gb|ACG44219.1| phenylalanine ammonia-lyase [Zea mays]	76.24	1668	40.82	5.90157e-68
	c165593_g1	gi|573919869|ref|XP_006647543.1| PREDICTED: phenylalanine ammonia-lyase-like [Oryza brachyantha]	76.26	1794	38.11	6.57055e-61
	c170349_g1	gi|475529359|gb|EMT07760.1| Phenylalanine ammonia-lyase [Aegilops tauschii]	74.79	1812	36.01	1.05316e-59
	c172467_g1	gi|226533210|ref|NP_001151482.1| phenylalanine ammonia-lyase [Zea mays] gi|195647110|gb|ACG43023.1| phenylalanine ammonia-lyase [Zea mays]	81.48	1842	38.97	1.49807e-74
	c173907_g1	gi|121615560|gb|ABM63378.1| phenylalanine ammonia-lyase [Saccharum officinarum]	85.39	1824	59.05	0
	c177474_g1	gi|175050408|gb|ABP96954.2| phenylalanine ammonia-lyase, partial [Phyllostachys edulis]	68.02	1545	38.72	9.07542e-87
	c177902_g1	gi|573919871|ref|XP_006647544.1| PREDICTED: phenylalanine ammonia-lyase [Oryza brachyantha]	58.06	1302	44.7	4.47823e-114
	c184230_g1	gi|129589|sp|P14166.1|PAL1_IPOBA RecName: Full=Phenylalanine ammonia-lyase gi|168272|gb|AAA33389.1| phenylalanine ammonia-lyase [Ipomoea batatas]	30.55	648	53.88	4.49638e-100
	c184601_g1	gi|195649503|gb|ACG44219.1| phenylalanine ammonia-lyase [Zea mays]	46.8	987	58.18	1.01195e-162
	c186595_g1	gi|778722342|ref|XP_011658466.1| PREDICTED: phenylalanine ammonia-lyase 1-like [Cucumis sativus]	46.59	774	56.6	1.28895e-132
	c196426_g1	gi|514715067|ref|XP_004953153.1| PREDICTED: phenylalanine/tyrosine ammonia-lyase-like [Setaria italica] gi|944266327|gb|KQL30567.1| hypothetical protein SETIT_016504mg [Setaria italica]	95.13	2088	38	1.18589e-80
	c199071_g1	gi|293332887|ref|NP_001168086.1| phenylalanine ammonia-lyase [Zea mays] gi|223945919|gb|ACN27043.1| unknown [Zea mays] gi|413937862|gb|AFW72413.1| phenylalanine ammonia-lyase [Zea mays]	10.07	234	58.97	1.43332e-16
	c203950_g1	gi|564686606|gb|AHB87101.1| phenylalanine ammonia-lyase [Saccharum hybrid cultivar Co 1148]	54.39	1215	41.15	1.2365e-73
	c212627_g1	gi|38569936|gb|AAR24505.1| phenylalanine ammonia-lyase [Bambusa oldhamii] gi|260103374|gb|ACX31738.1| phenylalanine ammonia-lyase 1 [Bambusa oldhamii]	74.02	1785	32.1	3.15331e-41
	c214449_g1	gi|564686604|gb|AHB87100.1| phenylalanine ammonia-lyase [Saccharum hybrid cultivar HSF-240]	53.42	1194	41.48	1.81779e-56
	c217531_g1	gi|62736192|gb|AAX97448.1| putative phenylalanine ammonia-lyase [Bambusa ventricosa]	63.18	1506	35.36	3.75646e-67
	c220161_g1	gi|121615560|gb|ABM63378.1| phenylalanine ammonia-lyase [Saccharum officinarum]	70.92	1542	54.94	0
	c222309_g1	gi|195649503|gb|ACG44219.1| phenylalanine ammonia-lyase [Zea mays]	23.76	504	80.59	8.75596e-139
	c225265_g1	gi|222154091|gb|ACM47229.1| phenylalanine ammonia-lyase [Phyllostachys edulis] gi|222154093|gb|ACM47230.1| phenylalanine ammonia-lyase [Phyllostachys edulis]	72.75	1584	38.32	4.86478e-111
	c235689_g1	gi|514802698|ref|XP_004976241.1| PREDICTED: phenylalanine ammonia-lyase [Setaria italica]	41.4	885	62.33	9.62641e-174
	c239561_g1	gi|357150276|ref|XP_003575403.1| PREDICTED: phenylalanine ammonia-lyase-like [Brachypodium distachyon] gi|944064825|gb|KQK00416.1| hypothetical protein BRADI_3g49270 [Brachypodium distachyon]	35.86	786	44.24	2.58577e-62
	c266313_g1	gi|385718959|gb|AFI71896.1| phenylalanine ammonia-lyase [Paeonia lactiflora]	20.11	426	97.89	3.425e-92
	c296196_g1	gi|530279291|gb|AGT17138.1| phenylalanine ammonia-lyase [Saccharum hybrid cultivar R570]	4.13	87	100	7.81062e-12
	c314755_g1	gi|49614765|dbj|BAD26880.1| phenylalanine ammonia-lyase, partial [Phyllostachys edulis]	23.3	123	95.12	1.08112e-19
	c314759_g1	gi|557375993|gb|AGZ95689.1| phenylalanine ammonia-lyase [Cenchrus purpureus]	9.86	213	84.51	1.55933e-27
	c314765_g1	gi|557375993|gb|AGZ95689.1| phenylalanine ammonia-lyase [Cenchrus purpureus]	9.86	213	84.51	2.19418e-29
Cinnamate 4-hydroxylase (C4H)	c5854_g1	gi|1023725796|gb|ANB43563.1| cinnamate 4-hydroxylase 1 [Miscanthus x giganteus]	22.36	333	95.54	8.80353e-91
	c13388_g1	gi|1023725802|gb|ANB43564.1| cinnamate 4-hydroxylase 2 [Miscanthus x giganteus]	100	1515	97.03	0
	c15056_g1	gi|1002270663|ref|XP_015639656.1| PREDICTED: trans-cinnamate 4-monooxygenase [Oryza sativa Japonica Group] gi|55168223|gb|AAV44089.1| putative cinnamate-4-hydroxylase [Oryza sativa Japonica Group] gi|113578741|dbj|BAF17104.1| Os05g0320700 [Oryza sativa Japonica Group] gi|122703596|dbj|BAF45113.1| cinnamate-4-hydroxylase [Oryza sativa Japonica Group] gi|215713536|dbj|BAG94673.1| unnamed protein pr…	27	432	67.35	1.38361e-60
	c27473_g1	gi|1023725796|gb|ANB43563.1| cinnamate 4-hydroxylase 1 [Miscanthus x giganteus]	20.96	315	98.1	2.15574e-114
	c34321_g1	gi|1023725802|gb|ANB43564.1| cinnamate 4-hydroxylase 2 [Miscanthus x giganteus]	61.78	939	66.88	0
	c66788_g1	gi|1023725796|gb|ANB43563.1| cinnamate 4-hydroxylase 1 [Miscanthus x giganteus]	89.02	1428	41.21	2.35626e-67
	c97237_g1	gi|1023725796|gb|ANB43563.1| cinnamate 4-hydroxylase 1 [Miscanthus x giganteus]	57.09	870	42.23	4.06798e-73
	c113787_g1	gi|1023725796|gb|ANB43563.1| cinnamate 4-hydroxylase 1 [Miscanthus x giganteus]	25.35	381	97.64	2.48413e-141
	c126038_g1	gi|1023725802|gb|ANB43564.1| cinnamate 4-hydroxylase 2 [Miscanthus x giganteus]	48.32	732	96.31	1.48027e-138
	c132504_g1	gi|1002270663|ref|XP_015639656.1| PREDICTED: trans-cinnamate 4-monooxygenase [Oryza sativa Japonica Group] gi|55168223|gb|AAV44089.1| putative cinnamate-4-hydroxylase [Oryza sativa Japonica Group] gi|113578741|dbj|BAF17104.1| Os05g0320700 [Oryza sativa Japonica Group] gi|122703596|dbj|BAF45113.1| cinnamate-4-hydroxylase [Oryza sativa Japonica Group] gi|215713536|dbj|BAG94673.1| unnamed protein pr…	39.8	591	42.38	1.11787e-36
	c147940_g1	gi|1023725802|gb|ANB43564.1| cinnamate 4-hydroxylase 2 [Miscanthus x giganteus]	50.69	798	45.49	9.64878e-71
	c164767_g1	gi|1023725796|gb|ANB43563.1| cinnamate 4-hydroxylase 1 [Miscanthus x giganteus]	59.68	930	73.55	4.92878e-163
	c168801_g1	gi|1023725796|gb|ANB43563.1| cinnamate 4-hydroxylase 1 [Miscanthus x giganteus]	33.13	492	89.76	8.14165e-100
	c172307_g1	gi|1023725802|gb|ANB43564.1| cinnamate 4-hydroxylase 2 [Miscanthus x giganteus]	89.9	1422	42.65	1.21426e-75
	c184482_g1	gi|1023725796|gb|ANB43563.1| cinnamate 4-hydroxylase 1 [Miscanthus x giganteus]	100	1503	99	0
	c184600_g1	gi|1023725802|gb|ANB43564.1| cinnamate 4-hydroxylase 2 [Miscanthus x giganteus]	71.49	1083	98.06	0
	c189922_g1	gi|1023725796|gb|ANB43563.1| cinnamate 4-hydroxylase 1 [Miscanthus x giganteus]	90.02	1374	49.15	2.63548e-109
	c189979_g1	gi|1023725796|gb|ANB43563.1| cinnamate 4-hydroxylase 1 [Miscanthus x giganteus]	21.56	324	83.33	6.64058e-108
	c201952_g1	gi|426264360|gb|AFY17064.1| cinnamate 4-hydroxylase 1 [Panicum virgatum]	48.9	741	43.08	1.25541e-39
	c208818_g1	gi|1023725796|gb|ANB43563.1| cinnamate 4-hydroxylase 1 [Miscanthus x giganteus]	36.33	558	58.73	1.90495e-73
	c214100_g1	gi|1023725796|gb|ANB43563.1| cinnamate 4-hydroxylase 1 [Miscanthus x giganteus]	52.3	786	98.09	1.14593e-149
	c223096_g1	gi|1023725796|gb|ANB43563.1| cinnamate 4-hydroxylase 1 [Miscanthus x giganteus]	76.65	1245	38.24	3.2945e-38
	c262463_g1	gi|459353590|gb|AGG55322.1| cinnamate 4-hydroxylase [Paeonia lactiflora]	17.43	276	91.3	2.76986e-50
	c281308_g1	gi|1023725796|gb|ANB43563.1| cinnamate 4-hydroxylase 1 [Miscanthus x giganteus]	13.77	222	55.41	2.18331e-12
	c324109_g1	gi|114785806|gb|ABI78932.1| cinnamate 4-hydroxylase [Fragaria chiloensis f. patagonica]	32.04	273	93.41	4.32797e-56
	c361381_g1	gi|333362476|gb|AEF30417.1| cinnamate 4-hydroxylase, partial [Fagopyrum tataricum]	21	132	81.82	1.19144e-12
4-coumarate--CoA ligase (4CL)	c4346_g1	gi|743766803|ref|XP_010913649.1| PREDICTED: 4-coumarate--CoA ligase 2-like [Elaeis guineensis]	29.3	489	56.02	3.15579e-58
	c14179_g1	gi|514821987|ref|XP_004985664.1| PREDICTED: 4-coumarate--CoA ligase-like 1 [Setaria italica] gi|944228129|gb|KQK92533.1| hypothetical protein SETIT_034892mg [Setaria italica]	43.3	747	78.31	1.29039e-174
	c38858_g1	gi|354832234|gb|AER42615.1| 4-coumarate:CoA ligase [Miscanthus lutarioriparius]	52.05	555	50	1.45654e-31
	c40389_g1	gi|672132191|ref|XP_008789675.1| PREDICTED: 4-coumarate--CoA ligase 2-like [Phoenix dactylifera]	37.11	606	42.36	1.88031e-85
	c40418_g1	gi|20161028|dbj|BAB89961.1| putative 4-coumarate:CoA ligase [Oryza sativa Japonica Group] gi|20161608|dbj|BAB90528.1| putative 4-coumarate-CoA ligase [Oryza sativa Japonica Group] gi|56784513|dbj|BAD82770.1| putative 4-coumarate:CoA ligase [Oryza sativa Japonica Group]	19.34	339	61.06	1.69795e-89
	c48509_g1	gi|354832234|gb|AER42615.1| 4-coumarate:CoA ligase [Miscanthus lutarioriparius]	96.49	990	98.79	0
	c57344_g1	gi|354832234|gb|AER42615.1| 4-coumarate:CoA ligase [Miscanthus lutarioriparius]	93.27	975	61.49	1.7102e-107
	c60069_g1	gi|357113996|ref|XP_003558787.1| PREDICTED: 4-coumarate--CoA ligase-like 1 [Brachypodium distachyon] gi|944088252|gb|KQK23604.1| hypothetical protein BRADI_1g74870 [Brachypodium distachyon]	48.07	837	44.56	2.70563e-102
	c64869_g1	gi|1035953825|gb|OAY75987.1| putative 4-coumarate--CoA ligase 3 [Ananas comosus]	16.46	243	88.89	1.49798e-62
	c66217_g1	gi|354832234|gb|AER42615.1| 4-coumarate:CoA ligase [Miscanthus lutarioriparius]	67.25	699	60.08	1.88055e-88
	c69683_g1	gi|354832234|gb|AER42615.1| 4-coumarate:CoA ligase [Miscanthus lutarioriparius]	68.42	729	50.4	7.63803e-83
	c69972_g1	gi|354832234|gb|AER42615.1| 4-coumarate:CoA ligase [Miscanthus lutarioriparius]	24.27	258	74.42	7.99824e-50
	c71252_g1	gi|354832234|gb|AER42615.1| 4-coumarate:CoA ligase [Miscanthus lutarioriparius]	54.39	558	98.92	5.85908e-122
	c74807_g1	gi|167887861|gb|ACA09448.1| 4-coumarate:CoA ligase [Bambusa emeiensis]	96.95	1677	36.87	1.21485e-52
	c88589_g1	gi|354832234|gb|AER42615.1| 4-coumarate:CoA ligase [Miscanthus lutarioriparius]	96.2	987	98.78	0
	c95622_g1	gi|514709154|ref|XP_004951717.1| PREDICTED: probable 4-coumarate--CoA ligase 3 [Setaria italica] gi|944264239|gb|KQL28479.1| hypothetical protein SETIT_016817mg [Setaria italica]	70.05	1224	40.71	7.07992e-44
	c96789_g1	gi|514821989|ref|XP_004985665.1| PREDICTED: 4-coumarate--CoA ligase-like 1 isoform X1 [Setaria italica] gi|944228131|gb|KQK92535.1| hypothetical protein SETIT_035033mg [Setaria italica] gi|944228132|gb|KQK92536.1| hypothetical protein SETIT_035033mg [Setaria italica]	82.97	1386	43	2.79527e-89
	c97534_g1	gi|354832234|gb|AER42615.1| 4-coumarate:CoA ligase [Miscanthus lutarioriparius]	96.2	1014	53.78	1.23198e-85
	c100659_g1	gi|1002242981|ref|XP_015625716.1| PREDICTED: probable 4-coumarate--CoA ligase 3 [Oryza sativa Japonica Group] gi|75290242|sp|Q6ETN3.1|4CL3_ORYSJ RecName: Full=Probable 4-coumarate--CoA ligase 3; Short=4CL 3; Short=Os4CL3; AltName: Full=4-coumaroyl-CoA synthase 3 gi|50252056|dbj|BAD27987.1| putative 4-coumarate coenzyme A ligase [Oryza sativa Japonica Group] gi|113535600|dbj|BAF07983.1| Os02g01776…	26.35	438	71.92	4.01432e-76
	c104230_g1	gi|514785842|ref|XP_004970939.1| PREDICTED: 4-coumarate--CoA ligase-like 5 [Setaria italica] gi|944243869|gb|KQL08177.1| hypothetical protein SETIT_000889mg [Setaria italica]	23.96	411	74.45	7.02325e-97
	c108908_g1	gi|362112182|gb|AEW12812.1| 4-coumarate CoA ligase [Cenchrus purpureus] gi|378758474|gb|AFC38426.1| 4-coumarate: CoA ligase [Cenchrus purpureus]	43.58	723	97.1	0
	c112954_g1	gi|514785842|ref|XP_004970939.1| PREDICTED: 4-coumarate--CoA ligase-like 5 [Setaria italica] gi|944243869|gb|KQL08177.1| hypothetical protein SETIT_000889mg [Setaria italica]	61.08	1050	44.72	7.78736e-45
	c118094_g1	gi|573918648|ref|XP_006646961.1| PREDICTED: probable 4-coumarate--CoA ligase 3 [Oryza brachyantha]	40.54	708	41.95	3.01036e-42
	c128972_g1	gi|357126359|ref|XP_003564855.1| PREDICTED: 4-coumarate--CoA ligase-like 5 [Brachypodium distachyon] gi|944075576|gb|KQK11060.1| hypothetical protein BRADI_2g57860 [Brachypodium distachyon]	24.01	402	70.9	2.33341e-107
	c131015_g1	gi|514821989|ref|XP_004985665.1| PREDICTED: 4-coumarate--CoA ligase-like 1 isoform X1 [Setaria italica] gi|944228131|gb|KQK92535.1| hypothetical protein SETIT_035033mg [Setaria italica] gi|944228132|gb|KQK92536.1| hypothetical protein SETIT_035033mg [Setaria italica]	82.78	1449	37.25	1.00049e-41
	c131031_g1	gi|756179187|gb|AJK93381.1| 4-coumarate:coenzyme A ligase [Lolium perenne]	60.79	1014	69.94	9.03782e-153
	c131893_g1	gi|473737125|gb|EMS45325.1| putative 4-coumarate--CoA ligase 2 [Triticum urartu]	31.17	216	90.28	1.38589e-35
	c139717_g1	gi|573923527|ref|XP_006649341.1| PREDICTED: 4-coumarate--CoA ligase-like 4 [Oryza brachyantha]	53.72	903	45.13	1.4263e-55
	c139951_g1	gi|474268775|gb|EMS60823.1| putative 4-coumarate--CoA ligase 3 [Triticum urartu]	39.01	678	38.63	4.35389e-23
	c154889_g1	gi|514821987|ref|XP_004985664.1| PREDICTED: 4-coumarate--CoA ligase-like 1 [Setaria italica] gi|944228129|gb|KQK92533.1| hypothetical protein SETIT_034892mg [Setaria italica]	24	417	70.5	2.04569e-105
	c164953_g1	gi|475503141|gb|EMT04499.1| Putative 4-coumarate--CoA ligase 2 [Aegilops tauschii]	26.44	165	74.55	1.92435e-21
	c171537_g1	gi|695003134|ref|XP_009383859.1| PREDICTED: 4-coumarate--CoA ligase-like 10 isoform X2 [Musa acuminata subsp. malaccensis]	32.82	549	49.73	1.19021e-53
	c173395_g1	gi|362112182|gb|AEW12812.1| 4-coumarate CoA ligase [Cenchrus purpureus] gi|378758474|gb|AFC38426.1| 4-coumarate: CoA ligase [Cenchrus purpureus]	63.47	1128	36.96	1.17252e-40
	c177702_g1	gi|573918648|ref|XP_006646961.1| PREDICTED: probable 4-coumarate--CoA ligase 3 [Oryza brachyantha]	95.68	1599	49.91	1.68003e-109
	c191279_g1	gi|756179191|gb|AJK93383.1| 4-coumarate:coenzyme A ligase [Lolium perenne]	17.93	393	74.05	1.23674e-91
	c201045_g1	gi|672132191|ref|XP_008789675.1| PREDICTED: 4-coumarate--CoA ligase 2-like [Phoenix dactylifera]	12.06	195	89.23	8.81682e-39
	c204363_g1	gi|1002251313|ref|XP_015629881.1| PREDICTED: 4-coumarate--CoA ligase-like 1 [Oryza sativa Japonica Group] gi|209572803|sp|Q0DV32.2|4CLL1_ORYSJ RecName: Full=4-coumarate--CoA ligase-like 1 gi|108706227|gb|ABF94022.1| AMP-binding enzyme family protein, expressed [Oryza sativa Japonica Group] gi|215768960|dbj|BAH01189.1| unnamed protein product [Oryza sativa Japonica Group] gi|937907419|dbj|BAS82339…	57.97	993	37.69	2.96478e-61
	c215809_g1	gi|357126359|ref|XP_003564855.1| PREDICTED: 4-coumarate--CoA ligase-like 5 [Brachypodium distachyon] gi|944075576|gb|KQK11060.1| hypothetical protein BRADI_2g57860 [Brachypodium distachyon]	20.58	351	56.78	4.29545e-54
	c218037_g1	gi|514785842|ref|XP_004970939.1| PREDICTED: 4-coumarate--CoA ligase-like 5 [Setaria italica] gi|944243869|gb|KQL08177.1| hypothetical protein SETIT_000889mg [Setaria italica]	21.62	357	68	3.85191e-43
	c229200_g1	gi|514751024|ref|XP_004962248.1| PREDICTED: 4-coumarate--CoA ligase-like 7 [Setaria italica] gi|944251484|gb|KQL15747.1| hypothetical protein SETIT_021673mg [Setaria italica]	45.05	744	46.85	5.71497e-84
	c234026_g1	gi|670432926|ref|XP_008656972.1| PREDICTED: 4-coumarate--CoA ligase-like 10 isoform X2 [Zea mays]	46.87	771	63.57	7.17624e-121
	c234981_g1	gi|514821987|ref|XP_004985664.1| PREDICTED: 4-coumarate--CoA ligase-like 1 [Setaria italica] gi|944228129|gb|KQK92533.1| hypothetical protein SETIT_034892mg [Setaria italica]	40.87	711	59.49	4.31454e-102
	c237635_g1	gi|514709154|ref|XP_004951717.1| PREDICTED: probable 4-coumarate--CoA ligase 3 [Setaria italica] gi|944264239|gb|KQL28479.1| hypothetical protein SETIT_016817mg [Setaria italica]	51.54	918	45.66	2.27559e-56
	c238936_g1	gi|362112182|gb|AEW12812.1| 4-coumarate CoA ligase [Cenchrus purpureus] gi|378758474|gb|AFC38426.1| 4-coumarate: CoA ligase [Cenchrus purpureus]	17.36	285	62.63	7.12991e-71
	c240417_g1	gi|670432926|ref|XP_008656972.1| PREDICTED: 4-coumarate--CoA ligase-like 10 isoform X2 [Zea mays]	47.63	798	50.18	1.51211e-44
	c240971_g1	gi|658041931|ref|XP_008356582.1| PREDICTED: 4-coumarate--CoA ligase-like 9 [Malus domestica]	23.09	300	95	4.35464e-57
	c273080_g1	gi|694332570|ref|XP_009356915.1| PREDICTED: 4-coumarate--CoA ligase-like 7 [Pyrus x bretschneideri]	17.8	291	95.88	4.47274e-56
	c281033_g1	gi|294622285|gb|ADF28249.1| 4-coumarate-CoA ligase [Cynodon dactylon]	54.05	270	54.35	2.33152e-18
	c296877_g1	gi|670364430|ref|XP_008658826.1| PREDICTED: 4-coumarate--CoA ligase-like 3 [Zea mays] gi|414867964|tpg|DAA46521.1| TPA: putative AMP-dependent synthetase and ligase superfamily protein [Zea mays]	8.17	132	78.72	2.22221e-14
	c300930_g1	gi|1035953817|gb|OAY75979.1| putative 4-coumarate--CoA ligase 3, partial [Ananas comosus]	18.79	84	89.29	3.96116e-08
	c301573_g1	gi|658059207|ref|XP_008365420.1| PREDICTED: 4-coumarate--CoA ligase-like 10 [Malus domestica]	100	1566	97.89	0
	c326345_g1	gi|354832232|gb|AER42614.1| 4-coumarate:CoA ligase [Miscanthus lutarioriparius]	13.45	138	95.65	1.80696e-09
	c355163_g1	gi|573923527|ref|XP_006649341.1| PREDICTED: 4-coumarate--CoA ligase-like 4 [Oryza brachyantha]	6.35	105	97.14	7.92425e-14
	c381129_g1	gi|970064444|ref|XP_015059189.1| PREDICTED: 4-coumarate--CoA ligase-like 5 [Solanum pennellii]	17.24	285	91.58	5.92354e-54
	c401289_g1	gi|658049994|ref|XP_008360705.1| PREDICTED: 4-coumarate--CoA ligase-like 10 [Malus domestica]	15.9	249	98.8	1.09847e-49
	c401993_g1	gi|694364020|ref|XP_009361168.1| PREDICTED: 4-coumarate--CoA ligase 2-like [Pyrus x bretschneideri]	14.55	264	100	8.23781e-53
p-coumarate 3-hydroxylase (C3H)	c51010_g1	gi|1023725815|gb|ANB43567.1| p-coumarate 3-hydroxylase 2 [Miscanthus x giganteus]	91.62	1410	99.15	0
	c57461_g1	gi|1023725815|gb|ANB43567.1| p-coumarate 3-hydroxylase 2 [Miscanthus x giganteus]	56.34	1014	48.56	7.28911e-91
	c108270_g1	gi|1023725815|gb|ANB43567.1| p-coumarate 3-hydroxylase 2 [Miscanthus x giganteus]	46	708	96.61	0
	c116471_g1	gi|1023725815|gb|ANB43567.1| p-coumarate 3-hydroxylase 2 [Miscanthus x giganteus]	91.03	1458	42.49	4.1987e-66
	c119828_g1	gi|1023725815|gb|ANB43567.1| p-coumarate 3-hydroxylase 2 [Miscanthus x giganteus]	71.15	1134	40	6.92838e-29
	c157575_g1	gi|1023725815|gb|ANB43567.1| p-coumarate 3-hydroxylase 2 [Miscanthus x giganteus]	70.37	1146	43.8	8.20301e-74
	c158951_g1	gi|1023725815|gb|ANB43567.1| p-coumarate 3-hydroxylase 2 [Miscanthus x giganteus]	69.4	1092	44.18	1.25766e-52
	c161922_g1	gi|1023725815|gb|ANB43567.1| p-coumarate 3-hydroxylase 2 [Miscanthus x giganteus]	92.4	1437	64.62	1.31353e-170
	c187725_g1	gi|1023725807|gb|ANB43566.1| p-coumarate 3-hydroxylase 1 [Miscanthus x giganteus]	84.77	1326	65.35	1.16407e-168
	c210178_g1	gi|1023725815|gb|ANB43567.1| p-coumarate 3-hydroxylase 2 [Miscanthus x giganteus]	91.62	1410	99.15	0
	c227576_g1	gi|1023725807|gb|ANB43566.1| p-coumarate 3-hydroxylase 1 [Miscanthus x giganteus]	48.24	741	99.6	0
	c301724_g1	gi|1023725807|gb|ANB43566.1| p-coumarate 3-hydroxylase 1 [Miscanthus x giganteus]	10.16	156	92.31	2.1777e-21
Hydroxycinnamoyl-CoA shikimate/quinate hydroxycinnamoyl transferase (HCT)	c14350_g1	gi|1024297566|gb|ANB66410.1| hydroxycinnamoyl-CoA shikimate/quinate hydroxycinnamoyl transferase [Saccharum spontaneum]	33.86	450	96.03	2.21691e-93
	c27495_g1	gi|695016063|ref|XP_009394928.1| PREDICTED: shikimate O-hydroxycinnamoyltransferase-like [Musa acuminata subsp. malaccensis]	29.71	396	47.1	8.55499e-45
	c69594_g1	gi|357118494|ref|XP_003560989.1| PREDICTED: shikimate O-hydroxycinnamoyltransferase-like [Brachypodium distachyon]	48.18	663	45.98	3.61593e-53
	c77405_g1	gi|972779276|ref|NP_001305430.1| uncharacterized protein LOC100304329 [Zea mays] gi|670385941|ref|XP_008673749.1| PREDICTED: shikimate O-hydroxycinnamoyltransferase [Zea mays] gi|414876468|tpg|DAA53599.1| TPA: hypothetical protein ZEAMMB73_476426 [Zea mays]	31.34	426	39.16	2.87939e-31
	c85583_g1	gi|1023725805|gb|ANB43565.1| hydroxycinnamoyl-CoA: shikimate hydroxycinnamoyl transferase 1 [Miscanthus x giganteus]	100	1332	98.2	0
	c100397_g1	gi|1024297566|gb|ANB66410.1| hydroxycinnamoyl-CoA shikimate/quinate hydroxycinnamoyl transferase [Saccharum spontaneum]	15.02	204	95.59	8.59991e-62
	c100543_g1	gi|1002297034|ref|XP_015611953.1| PREDICTED: shikimate O-hydroxycinnamoyltransferase [Oryza sativa Japonica Group] gi|50726120|dbj|BAD33641.1| putative hydroxycinnamoyl transferase [Oryza sativa Japonica Group] gi|113631439|dbj|BAF25120.1| Os09g0422000 [Oryza sativa Japonica Group] gi|215678844|dbj|BAG95281.1| unnamed protein product [Oryza sativa Japonica Group] gi|937933221|dbj|BAT08136.1| Os09…	11.59	153	84.31	5.7773e-34
	c101820_g1	gi|1024297566|gb|ANB66410.1| hydroxycinnamoyl-CoA shikimate/quinate hydroxycinnamoyl transferase [Saccharum spontaneum]	100	1338	97.98	0
	c107188_g1	gi|357158464|ref|XP_003578136.1| PREDICTED: shikimate O-hydroxycinnamoyltransferase-like [Brachypodium distachyon] gi|944054645|gb|KQJ90283.1| hypothetical protein BRADI_4g30530 [Brachypodium distachyon]	64.43	837	44.22	4.36412e-54
	c122756_g1	gi|1024297566|gb|ANB66410.1| hydroxycinnamoyl-CoA shikimate/quinate hydroxycinnamoyl transferase [Saccharum spontaneum]	100	1338	98.43	0
	c181350_g1	gi|514796474|ref|XP_004973560.1| PREDICTED: shikimate O-hydroxycinnamoyltransferase-like [Setaria italica] gi|944237642|gb|KQL01980.1| hypothetical protein SETIT_013787mg [Setaria italica]	22.22	297	70.71	1.643e-22
	c212720_g1	gi|1024297566|gb|ANB66410.1| hydroxycinnamoyl-CoA shikimate/quinate hydroxycinnamoyl transferase [Saccharum spontaneum]	36.32	510	66.47	4.8765e-114
	c218571_g1	gi|426264364|gb|AFY17066.1| hydroxycinnamoyl-coenzyme A shikimate/quinate hydroxycinnamoyltransferase-like protein 1a [Panicum virgatum]	37.95	513	40.33	1.02284e-13
	c253215_g1	gi|514803741|ref|XP_004976754.1| PREDICTED: shikimate O-hydroxycinnamoyltransferase-like [Setaria italica] gi|944234474|gb|KQK98836.1| hypothetical protein SETIT_012791mg [Setaria italica]	18.02	240	91.25	2.65654e-45
	c287367_g1	gi|573940139|ref|XP_006652479.1| PREDICTED: shikimate O-hydroxycinnamoyltransferase [Oryza brachyantha]	9.77	129	79.07	7.63715e-17
	c377775_g1	gi|380508822|gb|AFD64619.1| putative hydroxycinnamoyl-CoA:shikimate/quinate hydroxycinnamoyltransferase [Camellia sinensis]	16.11	219	57.53	2.01823e-19
Caffeoyl-CoA O-methyltransferase (CCoAOMT)	c27611_g1	gi|743854882|ref|XP_010941115.1| PREDICTED: probable caffeoyl-CoA O-methyltransferase At4g26220 isoform X3 [Elaeis guineensis]	34.27	294	74.49	1.47325e-82
	c52218_g1	gi|565410648|dbj|BAO20881.1| caffeoyl CoA O-methyltransferase 1 [Panicum virgatum]	92.22	711	98.31	3.14464e-160
	c148659_g1	gi|565410648|dbj|BAO20881.1| caffeoyl CoA O-methyltransferase 1 [Panicum virgatum]	50.19	387	96.9	4.07398e-106
	c159045_g1	gi|565410648|dbj|BAO20881.1| caffeoyl CoA O-methyltransferase 1 [Panicum virgatum]	37.74	291	97.94	4.15103e-95
	c189799_g1	gi|565410648|dbj|BAO20881.1| caffeoyl CoA O-methyltransferase 1 [Panicum virgatum]	93.77	777	79.54	7.21568e-126
	c198415_g1	gi|565410648|dbj|BAO20881.1| caffeoyl CoA O-methyltransferase 1 [Panicum virgatum]	73.54	567	98.94	1.48996e-125
	c225972_g1	gi|565410648|dbj|BAO20881.1| caffeoyl CoA O-methyltransferase 1 [Panicum virgatum]	91.44	717	84.94	6.92223e-124
	c231660_g1	gi|1002277762|ref|XP_015643224.1| PREDICTED: caffeoyl-CoA O-methyltransferase 1 [Oryza sativa Japonica Group] gi|5091498|dbj|BAA78733.1| putative caffeoyl-CoA O-methyltransferase [Oryza sativa Japonica Group] gi|49618875|gb|AAT68022.1| caffeoyl-CoA O-methyltransferase [Oryza sativa Japonica Group] gi|55296140|dbj|BAD67858.1| putative caffeoyl-CoA O-methyltransferase [Oryza sativa Japonica Group] …	42.31	363	45.16	1.0217e-14
	c248964_g1	gi|339517440|gb|AEJ83060.1| caffeoyl CoA 3-O-methyltransferase [Miscanthus lutarioriparius]	19.16	144	78	5.45674e-17
	c327315_g1	gi|226495421|ref|NP_001152511.1| caffeoyl-CoA O-methyltransferase 1 [Zea mays] gi|195657021|gb|ACG47978.1| caffeoyl-CoA O-methyltransferase 1 [Zea mays] gi|413925229|gb|AFW65161.1| caffeoyl-CoA O-methyltransferase 1 [Zea mays]	18.29	138	86.96	6.85137e-16
	c327324_g1	gi|226495421|ref|NP_001152511.1| caffeoyl-CoA O-methyltransferase 1 [Zea mays] gi|195657021|gb|ACG47978.1| caffeoyl-CoA O-methyltransferase 1 [Zea mays] gi|413925229|gb|AFW65161.1| caffeoyl-CoA O-methyltransferase 1 [Zea mays]	26.83	198	78.79	2.27161e-25
	c394829_g1	gi|526117529|ref|NP_001268047.1| caffeoyl-CoA O-methyltransferase [Vitis vinifera] gi|3023437|sp|Q43237.1|CAMT_VITVI RecName: Full=Caffeoyl-CoA O-methyltransferase; AltName: Full=Trans-caffeoyl-CoA 3-O-methyltransferase; Short=CCOAMT; Short=CCOAOMT gi|1000519|emb|CAA90969.1| caffeoyl-CoA O-methyltransferase [Vitis vinifera] gi|147853782|emb|CAN79561.1| hypothetical protein VITISV_021020 [Vitis vi…	40.5	294	95.92	1.74873e-61
Cinnamoyl-CoA reductase (CCR)	c1890_g1	gi|514731568|ref|XP_004957215.1| PREDICTED: cinnamoyl-CoA reductase 1-like [Setaria italica] gi|944260835|gb|KQL25092.1| hypothetical protein SETIT_030374mg [Setaria italica]	31.21	324	88.89	2.96733e-59
	c2739_g1	gi|933570795|gb|ALG76009.1| cinnamoyl-CoA reductase 1b [Miscanthus x giganteus]	93.01	1038	99.71	0
	c6744_g1	gi|514817072|ref|XP_004983267.1| PREDICTED: cinnamoyl-CoA reductase 2-like [Setaria italica] gi|944224928|gb|KQK89332.1| hypothetical protein SETIT_036505mg [Setaria italica]	57.27	606	76.73	1.50658e-97
	c7299_g1	gi|933570804|gb|ALG76011.1| cinnamoyl-CoA reductase 2a [Miscanthus x giganteus]	48.62	528	100	2.27994e-99
	c8750_g1	gi|514731568|ref|XP_004957215.1| PREDICTED: cinnamoyl-CoA reductase 1-like [Setaria italica] gi|944260835|gb|KQL25092.1| hypothetical protein SETIT_030374mg [Setaria italica]	37.86	393	87.79	1.20632e-73
	c9962_g1	gi|1023725864|gb|ANB43571.1| cinnamoyl-CoA reductase-like protein 1 [Miscanthus x giganteus]	87.54	843	97.86	0
	c10314_g1	gi|514817072|ref|XP_004983267.1| PREDICTED: cinnamoyl-CoA reductase 2-like [Setaria italica] gi|944224928|gb|KQK89332.1| hypothetical protein SETIT_036505mg [Setaria italica]	100	1011	82.49	0
	c10968_g1	gi|514731568|ref|XP_004957215.1| PREDICTED: cinnamoyl-CoA reductase 1-like [Setaria italica] gi|944260835|gb|KQL25092.1| hypothetical protein SETIT_030374mg [Setaria italica]	42.2	438	83.56	4.04512e-82
	c12177_g1	gi|1023725838|gb|ANB43569.1| cinnamoyl-CoA reductase 3 [Miscanthus x giganteus]	100	1029	98.83	0
	c18883_g1	gi|514731568|ref|XP_004957215.1| PREDICTED: cinnamoyl-CoA reductase 1-like [Setaria italica] gi|944260835|gb|KQL25092.1| hypothetical protein SETIT_030374mg [Setaria italica]	39.31	405	62.5	1.06713e-42
	c20912_g1	gi|15824654|gb|AAL09429.1|AF307997_1 cinnamoyl-CoA reductase I, partial [Triticum aestivum]	14.66	102	82.35	1.25342e-27
	c24525_g1	gi|514731568|ref|XP_004957215.1| PREDICTED: cinnamoyl-CoA reductase 1-like [Setaria italica] gi|944260835|gb|KQL25092.1| hypothetical protein SETIT_030374mg [Setaria italica]	97.11	1173	51.39	6.36473e-79
	c27831_g1	gi|933570804|gb|ALG76011.1| cinnamoyl-CoA reductase 2a [Miscanthus x giganteus]	65.19	708	54.66	3.99152e-60
	c28249_g1	gi|514817072|ref|XP_004983267.1| PREDICTED: cinnamoyl-CoA reductase 2-like [Setaria italica] gi|944224928|gb|KQK89332.1| hypothetical protein SETIT_036505mg [Setaria italica]	29.08	291	55.45	8.0809e-18
	c30126_g1	gi|933570795|gb|ALG76009.1| cinnamoyl-CoA reductase 1b [Miscanthus x giganteus]	36.02	408	52.17	1.98016e-35
	c31493_g1	gi|933570783|gb|ALG76006.1| cinnamoyl-CoA reductase [Miscanthus sinensis]	47.58	531	100	6.10771e-106
	c31566_g1	gi|1023725838|gb|ANB43569.1| cinnamoyl-CoA reductase 3 [Miscanthus x giganteus]	15.74	162	96.3	3.79871e-27
	c39208_g1	gi|933570779|gb|ALG76005.1| cinnamoyl-CoA reductase [Miscanthus sacchariflorus]	38.71	435	51.33	2.7564e-24
	c42024_g1	gi|1023725878|gb|ANB43572.1| cinnamoyl-CoA reductase-like protein 2 [Miscanthus x giganteus]	95.52	960	98.12	0
	c43824_g1	gi|514731568|ref|XP_004957215.1| PREDICTED: cinnamoyl-CoA reductase 1-like [Setaria italica] gi|944260835|gb|KQL25092.1| hypothetical protein SETIT_030374mg [Setaria italica]	37.86	393	87.79	3.29361e-73
	c45594_g1	gi|1002291539|ref|XP_015650109.1| PREDICTED: cinnamoyl-CoA reductase 1 [Oryza sativa Japonica Group] gi|42408701|dbj|BAD09920.1| putative cinnamoyl-CoA reductase [Oryza sativa Japonica Group] gi|113623878|dbj|BAF23823.1| Os08g0441500 [Oryza sativa Japonica Group] gi|215706326|dbj|BAG93182.1| unnamed protein product [Oryza sativa Japonica Group] gi|215740719|dbj|BAG97375.1| unnamed protein product…	22.44	243	93.83	7.91361e-108
	c50699_g1	gi|933570795|gb|ALG76009.1| cinnamoyl-CoA reductase 1b [Miscanthus x giganteus]	94.09	1050	98.57	0
	c50799_g1	gi|933570804|gb|ALG76011.1| cinnamoyl-CoA reductase 2a [Miscanthus x giganteus]	31.77	345	100	3.73036e-80
	c54799_g1	gi|3341511|emb|CAA13176.1| cinnamoyl-CoA reductase [Saccharum officinarum]	69.35	774	98.84	3.68884e-162
	c58696_g1	gi|1023725838|gb|ANB43569.1| cinnamoyl-CoA reductase 3 [Miscanthus x giganteus]	78.43	807	98.88	0
	c58967_g1	gi|514731568|ref|XP_004957215.1| PREDICTED: cinnamoyl-CoA reductase 1-like [Setaria italica] gi|944260835|gb|KQL25092.1| hypothetical protein SETIT_030374mg [Setaria italica]	98.27	1029	92.71	0
	c61020_g1	gi|514731568|ref|XP_004957215.1| PREDICTED: cinnamoyl-CoA reductase 1-like [Setaria italica] gi|944260835|gb|KQL25092.1| hypothetical protein SETIT_030374mg [Setaria italica]	28.32	294	92.86	1.82828e-86
	c74311_g1	gi|514731568|ref|XP_004957215.1| PREDICTED: cinnamoyl-CoA reductase 1-like [Setaria italica] gi|944260835|gb|KQL25092.1| hypothetical protein SETIT_030374mg [Setaria italica]	51.73	573	38.22	1.34928e-17
	c77295_g1	gi|933570808|gb|ALG76012.1| cinnamoyl-CoA reductase 2b [Miscanthus x giganteus]	46.69	513	66.67	9.11497e-80
	c82163_g1	gi|1023725878|gb|ANB43572.1| cinnamoyl-CoA reductase-like protein 2 [Miscanthus x giganteus]	95.52	960	99.06	0
	c87636_g1	gi|573947910|ref|XP_006656265.1| PREDICTED: cinnamoyl-CoA reductase 1-like [Oryza brachyantha]	28.53	288	53.61	3.97558e-32
	c90228_g1	gi|933570795|gb|ALG76009.1| cinnamoyl-CoA reductase 1b [Miscanthus x giganteus]	57.26	639	57.28	7.91562e-45
	c98642_g1	gi|933570804|gb|ALG76011.1| cinnamoyl-CoA reductase 2a [Miscanthus x giganteus]	31.77	480	69.38	1.75918e-70
	c99133_g1	gi|514817652|ref|XP_004983544.1| PREDICTED: cinnamoyl-CoA reductase 1-like [Setaria italica] gi|944225350|gb|KQK89754.1| hypothetical protein SETIT_036554mg [Setaria italica]	89.43	897	54.4	2.32388e-73
	c102201_g1	gi|514817072|ref|XP_004983267.1| PREDICTED: cinnamoyl-CoA reductase 2-like [Setaria italica] gi|944224928|gb|KQK89332.1| hypothetical protein SETIT_036505mg [Setaria italica]	18.69	189	88.89	6.77391e-28
	c102391_g1	gi|514817072|ref|XP_004983267.1| PREDICTED: cinnamoyl-CoA reductase 2-like [Setaria italica] gi|944224928|gb|KQK89332.1| hypothetical protein SETIT_036505mg [Setaria italica]	51.04	516	79.65	5.35574e-80
	c114414_g1	gi|3341511|emb|CAA13176.1| cinnamoyl-CoA reductase [Saccharum officinarum]	100	1113	96.77	0
	c121489_g1	gi|1023725894|gb|ANB43573.1| cinnamoyl-CoA reductase-like protein 3 [Miscanthus x giganteus]	45.02	450	78	1.41199e-125
	c121532_g1	gi|1023725878|gb|ANB43572.1| cinnamoyl-CoA reductase-like protein 2 [Miscanthus x giganteus]	96.42	969	96.9	0
	c123364_g1	gi|1023725864|gb|ANB43571.1| cinnamoyl-CoA reductase-like protein 1 [Miscanthus x giganteus]	59.81	576	98.44	1.63844e-170
	c123382_g1	gi|1023725878|gb|ANB43572.1| cinnamoyl-CoA reductase-like protein 2 [Miscanthus x giganteus]	79.1	882	40.13	5.77181e-38
	c124085_g1	gi|1023725878|gb|ANB43572.1| cinnamoyl-CoA reductase-like protein 2 [Miscanthus x giganteus]	43.58	435	72.6	4.73944e-55
	c127900_g1	gi|1023725894|gb|ANB43573.1| cinnamoyl-CoA reductase-like protein 3 [Miscanthus x giganteus]	99.4	987	97.87	0
	c129562_g1	gi|1023725851|gb|ANB43570.1| cinnamoyl-CoA reductase 4 [Miscanthus x giganteus]	100	1032	99.13	0
	c143398_g1	gi|1023725878|gb|ANB43572.1| cinnamoyl-CoA reductase-like protein 2 [Miscanthus x giganteus]	19.7	204	64.71	3.96293e-12
	c156461_g1	gi|1023725864|gb|ANB43571.1| cinnamoyl-CoA reductase-like protein 1 [Miscanthus x giganteus]	100	963	99.07	0
	c157443_g1	gi|933570795|gb|ALG76009.1| cinnamoyl-CoA reductase 1b [Miscanthus x giganteus]	66.94	753	60.9	1.07474e-59
	c160533_g1	gi|1023725864|gb|ANB43571.1| cinnamoyl-CoA reductase-like protein 1 [Miscanthus x giganteus]	18.69	180	98.33	1.24849e-63
	c171576_g1	gi|933570804|gb|ALG76011.1| cinnamoyl-CoA reductase 2a [Miscanthus x giganteus]	80.94	879	99.66	4.24361e-176
	c173716_g1	gi|1023725878|gb|ANB43572.1| cinnamoyl-CoA reductase-like protein 2 [Miscanthus x giganteus]	39.4	399	55.64	2.06887e-27
	c174424_g1	gi|514817072|ref|XP_004983267.1| PREDICTED: cinnamoyl-CoA reductase 2-like [Setaria italica] gi|944224928|gb|KQK89332.1| hypothetical protein SETIT_036505mg [Setaria italica]	85.76	870	82.07	5.86149e-162
	c174493_g1	gi|1023725864|gb|ANB43571.1| cinnamoyl-CoA reductase-like protein 1 [Miscanthus x giganteus]	39.56	378	79.53	1.37029e-71
	c181758_g1	gi|1023725878|gb|ANB43572.1| cinnamoyl-CoA reductase-like protein 2 [Miscanthus x giganteus]	23.88	240	100	5.50769e-78
	c185892_g1	gi|1023725864|gb|ANB43571.1| cinnamoyl-CoA reductase-like protein 1 [Miscanthus x giganteus]	19	186	79.03	2.5755e-17
	c188074_g1	gi|1023725864|gb|ANB43571.1| cinnamoyl-CoA reductase-like protein 1 [Miscanthus x giganteus]	88.79	885	47.67	3.64186e-56
	c190387_g1	gi|1023725864|gb|ANB43571.1| cinnamoyl-CoA reductase-like protein 1 [Miscanthus x giganteus]	20.56	198	80.3	2.62355e-27
	c192491_g1	gi|17978549|gb|AAL47182.1| cinnamoyl-CoA reductase [Lolium perenne] gi|17978551|gb|AAL47183.1| cinnamoyl-CoA reductase [Lolium perenne] gi|756179203|gb|AJK93389.1| cinnamoyl CoA reductase [Lolium perenne]	42.27	462	52.6	1.19691e-54
	c205329_g1	gi|1023725894|gb|ANB43573.1| cinnamoyl-CoA reductase-like protein 3 [Miscanthus x giganteus]	82.18	816	97.79	2.6785e-170
	c206980_g1	gi|1023725878|gb|ANB43572.1| cinnamoyl-CoA reductase-like protein 2 [Miscanthus x giganteus]	50.75	510	98.24	1.92307e-106
	c208575_g1	gi|1023725878|gb|ANB43572.1| cinnamoyl-CoA reductase-like protein 2 [Miscanthus x giganteus]	37.01	375	61.6	3.44528e-33
	c208684_g1	gi|1023725878|gb|ANB43572.1| cinnamoyl-CoA reductase-like protein 2 [Miscanthus x giganteus]	34.63	348	100	1.7744e-81
	c217896_g1	gi|514817652|ref|XP_004983544.1| PREDICTED: cinnamoyl-CoA reductase 1-like [Setaria italica] gi|944225350|gb|KQK89754.1| hypothetical protein SETIT_036554mg [Setaria italica]	26.89	276	83.7	4.05923e-52
	c220822_g1	gi|933570775|gb|ALG76004.1| cinnamoyl-CoA reductase [Miscanthus lutarioriparius]	48.92	570	49.23	3.72437e-34
	c222063_g1	gi|3242328|emb|CAA66707.1| cinnamoyl-CoA reductase [Zea mays] gi|223973729|gb|ACN31052.1| unknown [Zea mays]	16.17	201	55.22	6.02076e-12
	c222103_g1	gi|1002227168|ref|XP_015630482.1| PREDICTED: cinnamoyl-CoA reductase 1 [Oryza sativa Japonica Group] gi|218189307|gb|EEC71734.1| hypothetical protein OsI_04286 [Oryza sativa Indica Group]	48.16	471	69.43	2.77039e-129
	c222985_g1	gi|1023725851|gb|ANB43570.1| cinnamoyl-CoA reductase 4 [Miscanthus x giganteus]	91.86	930	91.19	1.72342e-172
	c226327_g1	gi|514817072|ref|XP_004983267.1| PREDICTED: cinnamoyl-CoA reductase 2-like [Setaria italica] gi|944224928|gb|KQK89332.1| hypothetical protein SETIT_036505mg [Setaria italica]	36.8	372	83.06	2.66241e-61
	c228047_g1	gi|514817072|ref|XP_004983267.1| PREDICTED: cinnamoyl-CoA reductase 2-like [Setaria italica] gi|944224928|gb|KQK89332.1| hypothetical protein SETIT_036505mg [Setaria italica]	50.74	513	82.46	8.29954e-97
	c231741_g1	gi|514760378|ref|XP_004964526.1| PREDICTED: cinnamoyl-CoA reductase 2-like isoform X1 [Setaria italica]	60.8	630	39.91	6.2153e-33
	c232553_g1	gi|1023725864|gb|ANB43571.1| cinnamoyl-CoA reductase-like protein 1 [Miscanthus x giganteus]	10.9	105	100	2.7485e-12
	c233537_g1	gi|1023725878|gb|ANB43572.1| cinnamoyl-CoA reductase-like protein 2 [Miscanthus x giganteus]	85.67	918	40.57	2.16676e-40
	c236895_g1	gi|1023725864|gb|ANB43571.1| cinnamoyl-CoA reductase-like protein 1 [Miscanthus x giganteus]	96.26	957	50.46	1.19787e-64
	c249731_g1	gi|645251002|ref|XP_008231478.1| PREDICTED: cinnamoyl-CoA reductase 1-like [Prunus mume]	24.77	240	86.25	9.01555e-43
	c252092_g1	gi|702516629|ref|XP_010042036.1| PREDICTED: cinnamoyl-CoA reductase 1-like [Eucalyptus grandis]	21.6	210	75.71	7.72328e-30
	c260007_g1	gi|514783789|ref|XP_004970432.1| PREDICTED: cinnamoyl-CoA reductase 1-like isoform X2 [Setaria italica] gi|944243236|gb|KQL07544.1| hypothetical protein SETIT_002597mg [Setaria italica]	11.88	93	77.42	1.30408e-09
	c283820_g1	gi|573917601|ref|XP_006646443.1| PREDICTED: cinnamoyl-CoA reductase 1-like, partial [Oryza brachyantha]	23.1	198	64.29	3.18974e-29
	c294813_g1	gi|670378736|ref|XP_008670288.1| PREDICTED: cinnamoyl-CoA reductase 2-like [Zea mays] gi|414589840|tpg|DAA40411.1| TPA: hypothetical protein ZEAMMB73_779046 [Zea mays]	10.98	111	81.08	5.19511e-10
	c305792_g1	gi|1023725878|gb|ANB43572.1| cinnamoyl-CoA reductase-like protein 2 [Miscanthus x giganteus]	8.66	87	96.55	1.77239e-08
	c311451_g1	gi|1023725864|gb|ANB43571.1| cinnamoyl-CoA reductase-like protein 1 [Miscanthus x giganteus]	15.58	150	100	4.60425e-24
	c311454_g1	gi|1023725864|gb|ANB43571.1| cinnamoyl-CoA reductase-like protein 1 [Miscanthus x giganteus]	15.58	150	100	1.33489e-23
	c311455_g1	gi|1023725864|gb|ANB43571.1| cinnamoyl-CoA reductase-like protein 1 [Miscanthus x giganteus]	15.89	153	98.04	5.54768e-24
	c311731_g1	gi|1023725851|gb|ANB43570.1| cinnamoyl-CoA reductase 4 [Miscanthus x giganteus]	19.77	204	92.65	2.78726e-34
	c323251_g1	gi|1023725864|gb|ANB43571.1| cinnamoyl-CoA reductase-like protein 1 [Miscanthus x giganteus]	11.21	108	100	1.7226e-16
	c344246_g1	gi|933570804|gb|ALG76011.1| cinnamoyl-CoA reductase 2a [Miscanthus x giganteus]	6.35	69	95.65	5.36767e-06
	c344247_g1	gi|357147900|ref|XP_003574536.1| PREDICTED: cinnamoyl-CoA reductase 1 [Brachypodium distachyon] gi|944062840|gb|KQJ98430.1| hypothetical protein BRADI_3g36887 [Brachypodium distachyon]	6.37	69	91.3	2.95873e-07
	c344249_g1	gi|933570804|gb|ALG76011.1| cinnamoyl-CoA reductase 2a [Miscanthus x giganteus]	7.46	81	85.19	3.90727e-06
	c356396_g1	gi|514779138|ref|XP_004969276.1| PREDICTED: cinnamoyl-CoA reductase 2 [Setaria italica] gi|944241735|gb|KQL06043.1| hypothetical protein SETIT_001854mg [Setaria italica]	10.82	123	87.8	3.33101e-17
	c380099_g1	gi|694326559|ref|XP_009354190.1| PREDICTED: cinnamoyl-CoA reductase 1-like [Pyrus x bretschneideri]	20.23	207	98.55	2.80032e-41
	c386561_g1	gi|567881345|ref|XP_006433231.1| hypothetical protein CICLE_v10003684mg [Citrus clementina] gi|568836147|ref|XP_006472109.1| PREDICTED: cinnamoyl-CoA reductase 2-like [Citrus sinensis] gi|557535353|gb|ESR46471.1| hypothetical protein CICLE_v10003684mg [Citrus clementina]	23.05	213	81.69	2.43545e-36
	c393347_g1	gi|514731568|ref|XP_004957215.1| PREDICTED: cinnamoyl-CoA reductase 1-like [Setaria italica] gi|944260835|gb|KQL25092.1| hypothetical protein SETIT_030374mg [Setaria italica]	8.09	84	92.86	1.13691e-09
	c402262_g1	gi|514808539|ref|XP_004979106.1| PREDICTED: cinnamoyl-CoA reductase 2-like [Setaria italica] gi|944229902|gb|KQK94288.1| hypothetical protein SETIT_026602mg [Setaria italica]	22.49	228	86.84	2.56936e-38
Ferulate 5-hydroxylase (F5H)	c3095_g1	gi|1023725826|gb|ANB43568.1| ferulate 5-hydroxylase [Miscanthus x giganteus]	90.17	1455	94.23	0
	c39872_g1	gi|15234332|ref|NP_195345.1| ferulic acid 5-hydroxylase 1 [Arabidopsis thaliana] gi|5921932|sp|Q42600.1|C84A1_ARATH RecName: Full=Cytochrome P450 84A1; AltName: Full=Ferulate-5-hydroxylase; Short=F5H gi|1488255|gb|AAC49389.1| ferulate-5-hydroxylase [Arabidopsis thaliana] gi|2961381|emb|CAA18128.1| ferulate-5-hydroxylase (FAH1) [Arabidopsis thaliana] gi|3925365|gb|AAD11580.1| ferulate-5-hydroxylas…	20.38	327	59.63	9.15585e-49
	c40508_g1	gi|1023725826|gb|ANB43568.1| ferulate 5-hydroxylase [Miscanthus x giganteus]	27.98	444	100	1.41803e-105
	c58828_g1	gi|1023725826|gb|ANB43568.1| ferulate 5-hydroxylase [Miscanthus x giganteus]	60.3	981	88.38	8.22373e-135
	c63196_g1	gi|223006908|gb|ACM69386.1| putative ferulate 5-hydroxylase [Phyllostachys praecox]	34.2	576	50	7.10402e-52
	c76838_g1	gi|1023725826|gb|ANB43568.1| ferulate 5-hydroxylase [Miscanthus x giganteus]	44.99	774	46.92	1.27672e-33
	c143086_g1	gi|1023725826|gb|ANB43568.1| ferulate 5-hydroxylase [Miscanthus x giganteus]	100	1587	99.05	0
Caffeic acid 3-O-methyltransferase (COMT)	c6728_g1	gi|815967580|gb|AKE73548.1| caffeic acid 3-O-methyltransferase [Miscanthus sacchariflorus]	100	1086	99.72	0
	c8589_g1	gi|34398680|gb|AAQ67347.1| caffeic acid 3-O-methyltransferase [Saccharum hybrid cultivar] gi|723438734|gb|AIX94080.1| caffeic acid-0-methyltransferase [Saccharum hybrid cultivar] gi|751090548|gb|AJF36158.1| caffeic acid 3-O-methyltransferase protein [Saccharum hybrid cultivar GT11]	54.7	630	53.27	1.34607e-75
	c9385_g1	gi|815967577|gb|AKE73547.1| caffeic acid 3-O-methyltransferase [Miscanthus lutarioriparius]	61.6	669	100	4.32842e-156
	c17287_g1	gi|815967583|gb|AKE73549.1| caffeic acid 3-O-methyltransferase [Miscanthus sinensis] gi|815967586|gb|AKE73550.1| caffeic acid 3-O-methyltransferase [Miscanthus floridulus]	61.6	669	100	1.14616e-154
	c17703_g1	gi|723633994|gb|AIY22649.1| caffeic acid 3-O-methyl transferase, partial [Saccharum arundinaceum] gi|723633996|gb|AIY22650.1| caffeic acid 3-O-methyl transferase, partial [Miscanthus sp. LK-2014]	89.73	609	67.49	2.93199e-70
	c17865_g1	gi|242080629|ref|XP_002445083.1| hypothetical protein SORBIDRAFT_07g003860 [Sorghum bicolor] gi|241941433|gb|EES14578.1| hypothetical protein SORBI_007G047300 [Sorghum bicolor] gi|321146435|gb|ADW65743.1| caffeic acid O-methyltransferase [Sorghum bicolor]	57.18	615	55.92	2.67615e-91
	c18926_g1	gi|297186089|gb|ADI24332.1| caffeic acid 3-O-methyltransferase [Miscanthus sinensis]	97.24	1170	40.35	8.66924e-45
	c27002_g1	gi|815967583|gb|AKE73549.1| caffeic acid 3-O-methyltransferase [Miscanthus sinensis] gi|815967586|gb|AKE73550.1| caffeic acid 3-O-methyltransferase [Miscanthus floridulus]	65.47	759	54.09	1.06856e-59
	c27171_g1	gi|815967583|gb|AKE73549.1| caffeic acid 3-O-methyltransferase [Miscanthus sinensis] gi|815967586|gb|AKE73550.1| caffeic acid 3-O-methyltransferase [Miscanthus floridulus]	56.35	612	100	1.08819e-139
	c28658_g1	gi|815967577|gb|AKE73547.1| caffeic acid 3-O-methyltransferase [Miscanthus lutarioriparius]	61.6	669	100	1.81871e-155
	c29663_g1	gi|815967580|gb|AKE73548.1| caffeic acid 3-O-methyltransferase [Miscanthus sacchariflorus]	100	1086	99.72	0
	c33712_g1	gi|242080629|ref|XP_002445083.1| hypothetical protein SORBIDRAFT_07g003860 [Sorghum bicolor] gi|241941433|gb|EES14578.1| hypothetical protein SORBI_007G047300 [Sorghum bicolor] gi|321146435|gb|ADW65743.1| caffeic acid O-methyltransferase [Sorghum bicolor]	11.6	126	59.52	2.42608e-06
	c34239_g1	gi|723633994|gb|AIY22649.1| caffeic acid 3-O-methyl transferase, partial [Saccharum arundinaceum] gi|723633996|gb|AIY22650.1| caffeic acid 3-O-methyl transferase, partial [Miscanthus sp. LK-2014]	87.5	603	54.23	1.09526e-46
	c38179_g1	gi|297186089|gb|ADI24332.1| caffeic acid 3-O-methyltransferase [Miscanthus sinensis]	62.43	678	99.56	1.85085e-157
	c41961_g1	gi|815967583|gb|AKE73549.1| caffeic acid 3-O-methyltransferase [Miscanthus sinensis] gi|815967586|gb|AKE73550.1| caffeic acid 3-O-methyltransferase [Miscanthus floridulus]	78.73	894	39.17	1.72337e-29
	c42587_g1	gi|723633994|gb|AIY22649.1| caffeic acid 3-O-methyl transferase, partial [Saccharum arundinaceum] gi|723633996|gb|AIY22650.1| caffeic acid 3-O-methyl transferase, partial [Miscanthus sp. LK-2014]	50	342	60.68	2.52839e-23
	c45438_g1	gi|723633992|gb|AIY22648.1| caffeic acid 3-O-methyl transferase, partial [Saccharum arundinaceum]	54.46	366	100	2.48099e-83
	c46412_g1	gi|815967590|gb|AKE73551.1| caffeic acid 3-O-methyltransferase [Miscanthus x giganteus]	65.75	795	53.18	3.67566e-49
	c47005_g1	gi|723633992|gb|AIY22648.1| caffeic acid 3-O-methyl transferase, partial [Saccharum arundinaceum]	97.32	696	47.88	4.6897e-41
	c48766_g1	gi|815967583|gb|AKE73549.1| caffeic acid 3-O-methyltransferase [Miscanthus sinensis] gi|815967586|gb|AKE73550.1| caffeic acid 3-O-methyltransferase [Miscanthus floridulus]	62.98	693	97.4	1.43339e-159
	c51921_g1	gi|815967580|gb|AKE73548.1| caffeic acid 3-O-methyltransferase [Miscanthus sacchariflorus]	83.15	912	41.46	7.23189e-41
	c55303_g1	gi|357143574|ref|XP_003572969.1| PREDICTED: caffeic acid 3-O-methyltransferase [Brachypodium distachyon] gi|944065855|gb|KQK01446.1| hypothetical protein BRADI_3g55890 [Brachypodium distachyon]	14.36	156	80.77	7.11821e-30
	c59544_g1	gi|815967580|gb|AKE73548.1| caffeic acid 3-O-methyltransferase [Miscanthus sacchariflorus]	79.28	897	39.8	1.88473e-25
	c60995_g1	gi|815967580|gb|AKE73548.1| caffeic acid 3-O-methyltransferase [Miscanthus sacchariflorus]	89.5	1005	52.15	4.66539e-74
	c61329_g1	gi|815967583|gb|AKE73549.1| caffeic acid 3-O-methyltransferase [Miscanthus sinensis] gi|815967586|gb|AKE73550.1| caffeic acid 3-O-methyltransferase [Miscanthus floridulus]	52.76	573	99.48	2.29668e-133
	c62928_g1	gi|815967583|gb|AKE73549.1| caffeic acid 3-O-methyltransferase [Miscanthus sinensis] gi|815967586|gb|AKE73550.1| caffeic acid 3-O-methyltransferase [Miscanthus floridulus]	56.35	618	62.62	6.47481e-98
	c63396_g1	gi|34398680|gb|AAQ67347.1| caffeic acid 3-O-methyltransferase [Saccharum hybrid cultivar] gi|723438734|gb|AIX94080.1| caffeic acid-0-methyltransferase [Saccharum hybrid cultivar] gi|751090548|gb|AJF36158.1| caffeic acid 3-O-methyltransferase protein [Saccharum hybrid cultivar GT11]	73.48	831	41.88	1.23925e-44
	c66661_g1	gi|297186089|gb|ADI24332.1| caffeic acid 3-O-methyltransferase [Miscanthus sinensis]	56.91	627	69.05	1.36391e-78
	c68117_g1	gi|815967583|gb|AKE73549.1| caffeic acid 3-O-methyltransferase [Miscanthus sinensis] gi|815967586|gb|AKE73550.1| caffeic acid 3-O-methyltransferase [Miscanthus floridulus]	83.7	930	42.44	1.13384e-44
	c71423_g1	gi|297186089|gb|ADI24332.1| caffeic acid 3-O-methyltransferase [Miscanthus sinensis]	100	1146	48.45	6.21452e-74
	c71530_g1	gi|815967583|gb|AKE73549.1| caffeic acid 3-O-methyltransferase [Miscanthus sinensis] gi|815967586|gb|AKE73550.1| caffeic acid 3-O-methyltransferase [Miscanthus floridulus]	88.95	999	46.85	1.17157e-51
	c73483_g1	gi|815967583|gb|AKE73549.1| caffeic acid 3-O-methyltransferase [Miscanthus sinensis] gi|815967586|gb|AKE73550.1| caffeic acid 3-O-methyltransferase [Miscanthus floridulus]	58.01	645	47.93	3.01895e-35
	c77667_g1	gi|815967583|gb|AKE73549.1| caffeic acid 3-O-methyltransferase [Miscanthus sinensis] gi|815967586|gb|AKE73550.1| caffeic acid 3-O-methyltransferase [Miscanthus floridulus]	61.6	669	100	7.6936e-156
	c77924_g1	gi|242080629|ref|XP_002445083.1| hypothetical protein SORBIDRAFT_07g003860 [Sorghum bicolor] gi|241941433|gb|EES14578.1| hypothetical protein SORBI_007G047300 [Sorghum bicolor] gi|321146435|gb|ADW65743.1| caffeic acid O-methyltransferase [Sorghum bicolor]	82.87	930	39.51	3.77576e-40
	c79251_g1	gi|815967583|gb|AKE73549.1| caffeic acid 3-O-methyltransferase [Miscanthus sinensis] gi|815967586|gb|AKE73550.1| caffeic acid 3-O-methyltransferase [Miscanthus floridulus]	40.88	447	83.22	4.95212e-143
	c79441_g1	gi|815967580|gb|AKE73548.1| caffeic acid 3-O-methyltransferase [Miscanthus sacchariflorus]	92.82	969	95.83	0
	c84593_g1	gi|815967577|gb|AKE73547.1| caffeic acid 3-O-methyltransferase [Miscanthus lutarioriparius]	61.6	669	100	0
	c85957_g1	gi|151579841|gb|ABS18316.1| caffeic acid-3-O-methyltransferase [Bambusa oldhamii]	25.28	276	86.96	1.1219e-73
	c88759_g1	gi|815967583|gb|AKE73549.1| caffeic acid 3-O-methyltransferase [Miscanthus sinensis] gi|815967586|gb|AKE73550.1| caffeic acid 3-O-methyltransferase [Miscanthus floridulus]	50.83	552	100	0
	c89954_g1	gi|723633992|gb|AIY22648.1| caffeic acid 3-O-methyl transferase, partial [Saccharum arundinaceum]	21.88	150	70	1.72325e-11
	c93321_g1	gi|297186089|gb|ADI24332.1| caffeic acid 3-O-methyltransferase [Miscanthus sinensis]	82.04	981	46.53	5.71357e-53
	c96486_g1	gi|28569609|gb|AAO43609.1| caffeic acid O-methyltransferase [Sorghum bicolor] gi|343796385|gb|AEM63601.1| caffeic acid O-methyltransferase [Sorghum bicolor] gi|343796435|gb|AEM63610.1| caffeic acid O-methyltransferase [Sorghum bicolor] gi|343796437|gb|AEM63611.1| caffeic acid O-methyltransferase [Sorghum bicolor] gi|343796439|gb|AEM63612.1| caffeic acid O-methyltransferase [Sorghum bicolor] gi|39…	28.18	327	48.21	3.31428e-31
	c102163_g1	gi|815967583|gb|AKE73549.1| caffeic acid 3-O-methyltransferase [Miscanthus sinensis] gi|815967586|gb|AKE73550.1| caffeic acid 3-O-methyltransferase [Miscanthus floridulus]	97.24	1137	41.12	8.6551e-52
	c105480_g1	gi|815967583|gb|AKE73549.1| caffeic acid 3-O-methyltransferase [Miscanthus sinensis] gi|815967586|gb|AKE73550.1| caffeic acid 3-O-methyltransferase [Miscanthus floridulus]	58.01	651	47.06	8.80759e-31
	c109280_g1	gi|815967583|gb|AKE73549.1| caffeic acid 3-O-methyltransferase [Miscanthus sinensis] gi|815967586|gb|AKE73550.1| caffeic acid 3-O-methyltransferase [Miscanthus floridulus]	100	1086	100	0
	c111018_g1	gi|815967580|gb|AKE73548.1| caffeic acid 3-O-methyltransferase [Miscanthus sacchariflorus]	93.92	1020	98.53	0
	c115990_g1	gi|195628530|gb|ACG36095.1| caffeic acid 3-O-methyltransferase [Zea mays]	30.75	351	79.49	8.98e-90
	c117376_g1	gi|723633992|gb|AIY22648.1| caffeic acid 3-O-methyl transferase, partial [Saccharum arundinaceum]	94.64	660	56.25	1.50133e-58
	c124271_g1	gi|29839259|sp|O82054.1|COMT1_SACOF RecName: Full=Caffeic acid 3-O-methyltransferase; Short=CAOMT; Short=COMT; AltName: Full=S-adenosysl-L-methionine:caffeic acid 3-O-methyltransferase gi|3341509|emb|CAA13175.1| caffeic acid 3-O-Methyltransferase [Saccharum officinarum]	27.35	306	73.53	3.50862e-49
	c124304_g1	gi|297186089|gb|ADI24332.1| caffeic acid 3-O-methyltransferase [Miscanthus sinensis]	67.96	741	64.37	6.95355e-80
	c129649_g1	gi|815967583|gb|AKE73549.1| caffeic acid 3-O-methyltransferase [Miscanthus sinensis] gi|815967586|gb|AKE73550.1| caffeic acid 3-O-methyltransferase [Miscanthus floridulus]	60.22	663	68.78	5.25197e-79
	c133704_g1	gi|815967577|gb|AKE73547.1| caffeic acid 3-O-methyltransferase [Miscanthus lutarioriparius]	27.07	294	98.98	1.20034e-85
	c149194_g1	gi|723633994|gb|AIY22649.1| caffeic acid 3-O-methyl transferase, partial [Saccharum arundinaceum] gi|723633996|gb|AIY22650.1| caffeic acid 3-O-methyl transferase, partial [Miscanthus sp. LK-2014]	66.52	447	60.4	1.06488e-45
	c151621_g1	gi|242080629|ref|XP_002445083.1| hypothetical protein SORBIDRAFT_07g003860 [Sorghum bicolor] gi|241941433|gb|EES14578.1| hypothetical protein SORBI_007G047300 [Sorghum bicolor] gi|321146435|gb|ADW65743.1| caffeic acid O-methyltransferase [Sorghum bicolor]	49.72	492	63.78	1.03943e-82
	c180862_g1	gi|815967590|gb|AKE73551.1| caffeic acid 3-O-methyltransferase [Miscanthus x giganteus]	88.95	1011	38.71	1.4352e-40
	c184968_g1	gi|815967583|gb|AKE73549.1| caffeic acid 3-O-methyltransferase [Miscanthus sinensis] gi|815967586|gb|AKE73550.1| caffeic acid 3-O-methyltransferase [Miscanthus floridulus]	31.49	342	99.12	1.04097e-124
	c185722_g1	gi|815967580|gb|AKE73548.1| caffeic acid 3-O-methyltransferase [Miscanthus sacchariflorus]	89.23	969	96.9	0
	c193007_g1	gi|323652514|gb|ADX98508.1| caffeic acid 3-O-methyltransferase [Panicum virgatum]	21.88	249	51.81	6.81593e-20
	c194589_g1	gi|815967583|gb|AKE73549.1| caffeic acid 3-O-methyltransferase [Miscanthus sinensis] gi|815967586|gb|AKE73550.1| caffeic acid 3-O-methyltransferase [Miscanthus floridulus]	98.07	1119	45.26	1.0773e-47
	c195056_g1	gi|815967577|gb|AKE73547.1| caffeic acid 3-O-methyltransferase [Miscanthus lutarioriparius]	46.41	504	99.4	2.03272e-125
	c203921_g1	gi|815967583|gb|AKE73549.1| caffeic acid 3-O-methyltransferase [Miscanthus sinensis] gi|815967586|gb|AKE73550.1| caffeic acid 3-O-methyltransferase [Miscanthus floridulus]	54.14	621	59.24	6.50336e-90
	c220612_g1	gi|815967580|gb|AKE73548.1| caffeic acid 3-O-methyltransferase [Miscanthus sacchariflorus]	67.4	780	45	9.08922e-75
	c228044_g1	gi|815967580|gb|AKE73548.1| caffeic acid 3-O-methyltransferase [Miscanthus sacchariflorus]	82.87	930	47.95	2.23399e-60
	c228534_g1	gi|815967583|gb|AKE73549.1| caffeic acid 3-O-methyltransferase [Miscanthus sinensis] gi|815967586|gb|AKE73550.1| caffeic acid 3-O-methyltransferase [Miscanthus floridulus]	98.34	1125	45.79	5.34814e-65
	c256630_g1	gi|658016268|ref|XP_008343472.1| PREDICTED: caffeic acid 3-O-methyltransferase 1-like [Malus domestica]	56.2	231	94.81	8.79207e-47
	c299264_g1	gi|723633992|gb|AIY22648.1| caffeic acid 3-O-methyl transferase, partial [Saccharum arundinaceum]	28.57	192	93.75	2.81038e-36
	c299267_g1	gi|723633992|gb|AIY22648.1| caffeic acid 3-O-methyl transferase, partial [Saccharum arundinaceum]	38.84	261	97.7	3.62267e-56
	c299269_g1	gi|723633992|gb|AIY22648.1| caffeic acid 3-O-methyl transferase, partial [Saccharum arundinaceum]	37.95	198	52.94	2.99242e-19
	c299270_g1	gi|815967590|gb|AKE73551.1| caffeic acid 3-O-methyltransferase [Miscanthus x giganteus]	22.38	243	98.77	2.00811e-52
	c299271_g1	gi|723633992|gb|AIY22648.1| caffeic acid 3-O-methyl transferase, partial [Saccharum arundinaceum]	45.09	246	67.33	5.3209e-39
	c299272_g1	gi|815967583|gb|AKE73549.1| caffeic acid 3-O-methyltransferase [Miscanthus sinensis] gi|815967586|gb|AKE73550.1| caffeic acid 3-O-methyltransferase [Miscanthus floridulus]	29.56	264	71.03	2.7723e-38
	c299274_g1	gi|815967590|gb|AKE73551.1| caffeic acid 3-O-methyltransferase [Miscanthus x giganteus]	24.31	207	64.77	2.67931e-32
	c299275_g1	gi|723633992|gb|AIY22648.1| caffeic acid 3-O-methyl transferase, partial [Saccharum arundinaceum]	34.38	231	94.81	2.65858e-45
	c299276_g1	gi|815967583|gb|AKE73549.1| caffeic acid 3-O-methyltransferase [Miscanthus sinensis] gi|815967586|gb|AKE73550.1| caffeic acid 3-O-methyltransferase [Miscanthus floridulus]	27.62	243	69	3.62678e-35
	c299278_g1	gi|815967583|gb|AKE73549.1| caffeic acid 3-O-methyltransferase [Miscanthus sinensis] gi|815967586|gb|AKE73550.1| caffeic acid 3-O-methyltransferase [Miscanthus floridulus]	24.31	264	98.86	2.97047e-55
	c299279_g1	gi|815967583|gb|AKE73549.1| caffeic acid 3-O-methyltransferase [Miscanthus sinensis] gi|815967586|gb|AKE73550.1| caffeic acid 3-O-methyltransferase [Miscanthus floridulus]	19.06	207	98.55	1.16e-45
Cinnamyl-alcohol dehydrogenase (CAD)	c2243_g1	gi|194692158|gb|ACF80163.1| unknown [Zea mays] gi|413952835|gb|AFW85484.1| putative cinnamyl-alcohol dehydrogenase family protein isoform 1 [Zea mays] gi|413952836|gb|AFW85485.1| putative cinnamyl-alcohol dehydrogenase family protein isoform 2 [Zea mays]	67.31	630	95.24	3.43847e-128
	c3228_g1	gi|321531596|gb|ADW94628.1| cinnamyl alcohol dehydrogenase [Cenchrus purpureus] gi|390433169|gb|AFL92282.1| cinnamyl alcohol dehydrogenase [Cenchrus purpureus]	42.08	465	58.33	1.09837e-68
	c17558_g1	gi|238013970|gb|ACR38020.1| unknown [Zea mays] gi|414885337|tpg|DAA61351.1| TPA: putative cinnamyl-alcohol dehydrogenase family protein [Zea mays]	51.34	288	92.71	7.52019e-55
	c28848_g1	gi|927544246|gb|ALE20538.1| cinnamyl alcohol dehydrogenase [Miscanthus floridulus]	31.51	345	98.26	3.40842e-117
	c31384_g1	gi|1002297599|ref|XP_015612229.1| PREDICTED: probable cinnamyl alcohol dehydrogenase 8C [Oryza sativa Japonica Group] gi|257096334|sp|Q6ERW7.2|CAD8C_ORYSJ RecName: Full=Probable cinnamyl alcohol dehydrogenase 8C; Short=OsCAD8C gi|218202121|gb|EEC84548.1| hypothetical protein OsI_31294 [Oryza sativa Indica Group] gi|222641530|gb|EEE69662.1| hypothetical protein OsJ_29283 [Oryza sativa Japonica Gro…	79.04	1059	34.99	1.30645e-24
	c49398_g1	gi|194692158|gb|ACF80163.1| unknown [Zea mays] gi|413952835|gb|AFW85484.1| putative cinnamyl-alcohol dehydrogenase family protein isoform 1 [Zea mays] gi|413952836|gb|AFW85485.1| putative cinnamyl-alcohol dehydrogenase family protein isoform 2 [Zea mays]	100	834	83.33	6.4319e-175
	c54675_g1	gi|573956761|ref|XP_006660608.1| PREDICTED: probable cinnamyl alcohol dehydrogenase 8C [Oryza brachyantha]	57.58	636	41.04	4.63404e-47
	c55655_g1	gi|927544246|gb|ALE20538.1| cinnamyl alcohol dehydrogenase [Miscanthus floridulus]	42.74	480	69.75	6.95692e-82
	c66172_g1	gi|927544240|gb|ALE20535.1| cinnamyl alcohol dehydrogenase [Miscanthus lutarioriparius] gi|927544242|gb|ALE20536.1| cinnamyl alcohol dehydrogenase [Miscanthus sacchariflorus]	72.88	798	98.87	4.66662e-151
	c68418_g1	gi|238013970|gb|ACR38020.1| unknown [Zea mays] gi|414885337|tpg|DAA61351.1| TPA: putative cinnamyl-alcohol dehydrogenase family protein [Zea mays]	22.99	129	97.67	1.36422e-20
	c73141_g1	gi|927544240|gb|ALE20535.1| cinnamyl alcohol dehydrogenase [Miscanthus lutarioriparius] gi|927544242|gb|ALE20536.1| cinnamyl alcohol dehydrogenase [Miscanthus sacchariflorus]	60.82	666	99.1	4.49251e-110
	c77386_g1	gi|474450603|gb|EMS68862.1| putative cinnamyl alcohol dehydrogenase 8D [Triticum urartu]	22.17	282	42.55	1.0303e-28
	c78554_g1	gi|927544246|gb|ALE20538.1| cinnamyl alcohol dehydrogenase [Miscanthus floridulus]	66.3	747	46.03	1.63784e-38
	c129310_g1	gi|514729691|ref|XP_004956759.1| PREDICTED: probable cinnamyl alcohol dehydrogenase 8D [Setaria italica]	69.38	765	53.46	2.86786e-52
	c152454_g1	gi|343796429|gb|AEM63607.1| cinnamyl alcohol dehydrogenase 2 [Sorghum bicolor]	31.78	351	75.21	3.31454e-70
	c160038_g1	gi|238013970|gb|ACR38020.1| unknown [Zea mays] gi|414885337|tpg|DAA61351.1| TPA: putative cinnamyl-alcohol dehydrogenase family protein [Zea mays]	76.47	429	91.61	5.49915e-86
	c166562_g1	gi|514729703|ref|XP_004956762.1| PREDICTED: probable cinnamyl alcohol dehydrogenase 8D [Setaria italica] gi|944260158|gb|KQL24415.1| hypothetical protein SETIT_030007mg [Setaria italica]	24.15	297	91.92	4.46642e-57
	c175233_g1	gi|927544240|gb|ALE20535.1| cinnamyl alcohol dehydrogenase [Miscanthus lutarioriparius] gi|927544242|gb|ALE20536.1| cinnamyl alcohol dehydrogenase [Miscanthus sacchariflorus]	100	1095	99.45	0
	c180391_g1	gi|702339506|ref|XP_010056070.1| PREDICTED: probable cinnamyl alcohol dehydrogenase 1 isoform X1 [Eucalyptus grandis] gi|702339512|ref|XP_010056071.1| PREDICTED: probable cinnamyl alcohol dehydrogenase 1 isoform X1 [Eucalyptus grandis] gi|629107502|gb|KCW72648.1| hypothetical protein EUGRSUZ_E01104 [Eucalyptus grandis]	28.25	303	59.41	2.943e-70
	c195515_g1	gi|413917071|gb|AFW57003.1| putative cinnamyl-alcohol dehydrogenase family protein [Zea mays]	33.43	357	71.67	9.12667e-109
	c224074_g1	gi|927544246|gb|ALE20538.1| cinnamyl alcohol dehydrogenase [Miscanthus floridulus]	46.58	555	44.15	1.12197e-23
	c226700_g1	gi|238013970|gb|ACR38020.1| unknown [Zea mays] gi|414885337|tpg|DAA61351.1| TPA: putative cinnamyl-alcohol dehydrogenase family protein [Zea mays]	76.47	534	73.6	9.00669e-77
	c270631_g1	gi|514729683|ref|XP_004956757.1| PREDICTED: probable cinnamyl alcohol dehydrogenase 8D [Setaria italica] gi|944260153|gb|KQL24410.1| hypothetical protein SETIT_030289mg [Setaria italica]	22.41	240	87.5	4.49659e-39
	c274293_g1	gi|1002866859|ref|XP_015696163.1| PREDICTED: putative cinnamyl alcohol dehydrogenase 5 [Oryza brachyantha]	8.47	93	96.77	8.32605e-15
	c288993_g1	gi|695271597|ref|NP_001289243.1| CAD protein [Pyrus x bretschneideri] gi|545669836|gb|AGW45367.1| cinnamyl alcohol dehydrogenase [Pyrus x bretschneideri]	98.15	957	99.37	0
	c338477_g1	gi|194692158|gb|ACF80163.1| unknown [Zea mays] gi|413952835|gb|AFW85484.1| putative cinnamyl-alcohol dehydrogenase family protein isoform 1 [Zea mays] gi|413952836|gb|AFW85485.1| putative cinnamyl-alcohol dehydrogenase family protein isoform 2 [Zea mays]	8.33	78	100	7.26941e-09
	c338480_g1	gi|383472222|gb|AFH36038.1| cinnamyl alcohol dehydrogenase, partial [Miscanthus sinensis]	38.75	93	96.77	3.18629e-13
	c368310_g1	gi|514729703|ref|XP_004956762.1| PREDICTED: probable cinnamyl alcohol dehydrogenase 8D [Setaria italica] gi|944260158|gb|KQL24415.1| hypothetical protein SETIT_030007mg [Setaria italica]	7.56	93	90.32	2.04049e-09
	c368311_g1	gi|238013970|gb|ACR38020.1| unknown [Zea mays] gi|414885337|tpg|DAA61351.1| TPA: putative cinnamyl-alcohol dehydrogenase family protein [Zea mays]	33.69	189	85.71	2.13627e-29
	c396012_g1	gi|658063079|ref|XP_008367452.1| PREDICTED: probable cinnamyl alcohol dehydrogenase 1 [Malus domestica]	24.65	264	100	1.38799e-57
	c408074_g1	gi|514729691|ref|XP_004956759.1| PREDICTED: probable cinnamyl alcohol dehydrogenase 8D [Setaria italica]	11.8	126	90.48	1.16993e-20
Laccase (LAC)	c44925_g1	gi|670394549|ref|XP_008677709.1| PREDICTED: uncharacterized protein LOC100501262 isoform X1 [Zea mays] gi|413920329|gb|AFW60261.1| putative laccase family protein [Zea mays]	92.15	1779	77.17	0
	c100524_g1	gi|414879686|tpg|DAA56817.1| TPA: putative laccase family protein [Zea mays]	51.26	921	39.09	1.46832e-23
	c196839_g1	gi|670410247|ref|XP_008646276.1| PREDICTED: putative laccase-9 [Zea mays] gi|413938901|gb|AFW73452.1| putative laccase family protein [Zea mays]	46.05	813	50.88	2.62177e-86
	c249279_g1	gi|470112569|ref|XP_004292505.1| PREDICTED: putative laccase-9 [Fragaria vesca subsp. vesca]	12.63	213	59.46	1.62776e-18
	c250530_g1	gi|514714280|ref|XP_004952969.1| PREDICTED: putative laccase-9 [Setaria italica] gi|944266050|gb|KQL30290.1| hypothetical protein SETIT_016752mg [Setaria italica]	7.25	126	92.86	1.66133e-22
	c251283_g1	gi|470112569|ref|XP_004292505.1| PREDICTED: putative laccase-9 [Fragaria vesca subsp. vesca]	17.41	297	60.78	1.00785e-34
	c262222_g1	gi|84618781|emb|CAJ30500.1| putative laccase [Zea mays]	7.84	138	97.83	5.43661e-23
	c266771_g1	gi|223947569|gb|ACN27868.1| unknown [Zea mays] gi|414879896|tpg|DAA57027.1| TPA: putative laccase family protein [Zea mays]	14.53	225	96	5.25319e-44
	c271256_g1	gi|1009123465|ref|XP_015878553.1| PREDICTED: laccase-15-like [Ziziphus jujuba]	14.59	249	81.93	2.67825e-41
	c271257_g1	gi|702382155|ref|XP_010063808.1| PREDICTED: laccase-14-like [Eucalyptus grandis] gi|629105595|gb|KCW71064.1| hypothetical protein EUGRSUZ_F04163 [Eucalyptus grandis]	11.04	198	84.85	1.39756e-34
	c278333_g1	gi|24415950|gb|AAN59950.1| laccase LAC12, partial [Lolium perenne]	40.7	210	90	1.98928e-41
	c279522_g1	gi|645263820|ref|XP_008237408.1| PREDICTED: laccase-15-like [Prunus mume]	25.88	456	56.58	4.7484e-44
	c314296_g1	gi|224030573|gb|ACN34362.1| unknown [Zea mays] gi|414879749|tpg|DAA56880.1| TPA: putative laccase family protein [Zea mays]	12.37	216	97.22	1.15681e-40
	c339017_g1	gi|473763884|gb|EMS45877.1| Laccase-15 [Triticum urartu]	8.66	228	85.53	6.44707e-16
	c350114_g1	gi|414872116|tpg|DAA50673.1| TPA: putative laccase family protein [Zea mays] gi|414879751|tpg|DAA56882.1| TPA: putative laccase family protein [Zea mays]	16.2	105	91.43	1.13115e-12
	c350115_g1	gi|414872116|tpg|DAA50673.1| TPA: putative laccase family protein [Zea mays] gi|414879751|tpg|DAA56882.1| TPA: putative laccase family protein [Zea mays]	21.76	141	93.62	9.18438e-23
	c350116_g1	gi|514820056|ref|XP_004984718.1| PREDICTED: laccase-10-like [Setaria italica] gi|944227082|gb|KQK91486.1| hypothetical protein SETIT_034916mg [Setaria italica]	31.4	537	96.65	1.2105e-121
	c362749_g1	gi|473763884|gb|EMS45877.1| Laccase-15 [Triticum urartu]	9.45	249	86.75	1.01159e-39
	c362750_g1	gi|473763884|gb|EMS45877.1| Laccase-15 [Triticum urartu]	7.18	174	80.95	7.72534e-22
	c377491_g1	gi|473763884|gb|EMS45877.1| Laccase-15 [Triticum urartu]	8.54	225	72	1.17043e-18
	c378847_g1	gi|514779086|ref|XP_004969263.1| PREDICTED: laccase-2-like [Setaria italica]	25.27	432	92.36	4.928e-89
	c384368_g1	gi|802611406|ref|XP_012074469.1| PREDICTED: laccase-14-like [Jatropha curcas]	11.69	198	64.18	9.59002e-23
	c396703_g1	gi|514752213|ref|XP_004962525.1| PREDICTED: laccase-25-like [Setaria italica] gi|944251905|gb|KQL16168.1| hypothetical protein SETIT_021601mg [Setaria italica]	10.43	180	98.33	6.34035e-35
	c400147_g1	gi|731436519|ref|XP_002264394.3| PREDICTED: laccase-14 [Vitis vinifera]	53.26	909	71.62	1.4325e-145

## Sheet: Cellulose related genes
Additional file 2: Identification of the cell wall related genes and their representitive transcripts
Cell wall related gene family	Transcript ID	NR annotation	Query coverage	Align Length	Identity	E-value
Cellulose synthase (Ces)	c850_g1	gi|924442995|gb|ALB78129.1| cellulose synthase catalytic subunit 1 [Miscanthus x giganteus]	100	3216	99.44	0
	c1310_g1	gi|670410027|ref|XP_008646187.1| PREDICTED: cellulose synthase-like protein E2 isoform X1 [Zea mays]	98.54	2229	92.73	0
	c3139_g1	gi|474311859|gb|EMS61953.1| Cellulose synthase-like protein E6 [Triticum urartu]	24.31	558	66.67	2.05957e-129
	c7194_g1	gi|902763229|ref|NP_001104955.2| cellulose synthase 5 [Zea mays] gi|414873523|tpg|DAA52080.1| TPA: cellulose synthase5 [Zea mays]	96.75	3333	41.37	0
	c8903_g1	gi|514731163|ref|XP_004957117.1| PREDICTED: cellulose synthase-like protein E6 [Setaria italica] gi|944260686|gb|KQL24943.1| hypothetical protein SETIT_029066mg [Setaria italica]	24.69	534	64.8	8.80341e-138
	c11076_g1	gi|1002285497|ref|XP_015647044.1| PREDICTED: probable cellulose synthase A catalytic subunit 6 [UDP-forming] [Oryza sativa Japonica Group] gi|75325284|sp|Q6YVM4.1|CESA6_ORYSJ RecName: Full=Probable cellulose synthase A catalytic subunit 6 [UDP-forming]; AltName: Full=OsCesA6 gi|34394962|dbj|BAC84511.1| putative cellulose synthase-8 [Oryza sativa Japonica Group] gi|113610839|dbj|BAF21217.1| Os07g0…	68.96	2454	40	2.66733e-142
	c11931_g1	gi|514731163|ref|XP_004957117.1| PREDICTED: cellulose synthase-like protein E6 [Setaria italica] gi|944260686|gb|KQL24943.1| hypothetical protein SETIT_029066mg [Setaria italica]	32.73	714	48.83	2.93963e-140
	c12616_g1	gi|695077257|ref|XP_009385959.1| PREDICTED: probable cellulose synthase A catalytic subunit 5 [UDP-forming] [Musa acuminata subsp. malaccensis]	20.9	687	63.91	7.43447e-142
	c16613_g1	gi|474311859|gb|EMS61953.1| Cellulose synthase-like protein E6 [Triticum urartu]	62.02	1506	30.43	1.06806e-34
	c16838_g1	gi|573950519|ref|XP_006657551.1| PREDICTED: probable cellulose synthase A catalytic subunit 8 [UDP-forming] [Oryza brachyantha]	70.31	2313	39.42	9.71642e-113
	c17051_g1	gi|1008264372|gb|AMQ81245.1| cellulose synthase catalytic subunit 5 [Miscanthus x giganteus]	80.56	2610	99.31	0
	c23514_g1	gi|414873522|tpg|DAA52079.1| TPA: cellulose synthase5 [Zea mays]	73.65	1572	58.41	0
	c26102_g1	gi|1008264372|gb|AMQ81245.1| cellulose synthase catalytic subunit 5 [Miscanthus x giganteus]	73.06	2496	43.57	7.24948e-114
	c28229_g1	gi|670410027|ref|XP_008646187.1| PREDICTED: cellulose synthase-like protein E2 isoform X1 [Zea mays]	59.15	1389	40.88	3.73391e-135
	c28712_g1	gi|672145093|ref|XP_008796456.1| PREDICTED: probable cellulose synthase A catalytic subunit 5 [UDP-forming] [Phoenix dactylifera]	22.29	741	53.39	1.82831e-102
	c32616_g1	gi|573965449|ref|XP_006664834.1| PREDICTED: probable cellulose synthase A catalytic subunit 3 [UDP-forming] [Oryza brachyantha]	93.96	3237	37.73	7.17062e-134
	c32707_g1	gi|1002850184|ref|XP_006650766.2| PREDICTED: LOW QUALITY PROTEIN: probable cellulose synthase A catalytic subunit 2 [UDP-forming] [Oryza brachyantha]	49.02	1593	66.61	0
	c34885_g1	gi|747047467|ref|XP_011069707.1| PREDICTED: cellulose synthase-like protein D2 [Sesamum indicum] gi|747047469|ref|XP_011069708.1| PREDICTED: cellulose synthase-like protein D2 [Sesamum indicum] gi|747047471|ref|XP_011069709.1| PREDICTED: cellulose synthase-like protein D2 [Sesamum indicum] gi|747047473|ref|XP_011069710.1| PREDICTED: cellulose synthase-like protein D2 [Sesamum indicum]	68.35	2424	32.47	1.24589e-108
	c35311_g1	gi|720079497|ref|XP_010241683.1| PREDICTED: cellulose synthase A catalytic subunit 2 [UDP-forming]-like [Nelumbo nucifera]	75.89	2616	33.97	4.47309e-115
	c36235_g1	gi|514731163|ref|XP_004957117.1| PREDICTED: cellulose synthase-like protein E6 [Setaria italica] gi|944260686|gb|KQL24943.1| hypothetical protein SETIT_029066mg [Setaria italica]	71.01	1530	36.53	9.51361e-102
	c39064_g1	gi|514731163|ref|XP_004957117.1| PREDICTED: cellulose synthase-like protein E6 [Setaria italica] gi|944260686|gb|KQL24943.1| hypothetical protein SETIT_029066mg [Setaria italica]	47.57	1053	42.74	4.18457e-88
	c39434_g1	gi|1008264376|gb|AMQ81247.1| cellulose synthase catalytic subunit 7 [Miscanthus x giganteus]	43.61	1422	99.79	0
	c40629_g1	gi|955717236|ref|XP_014660452.1| PREDICTED: cellulose synthase-like protein G2 [Setaria italica]	33.46	756	55.34	8.17467e-119
	c41014_g1	gi|162460818|ref|NP_001104957.1| cellulose synthase 7 [Zea mays] gi|9622886|gb|AAF89967.1|AF200531_1 cellulose synthase-7 [Zea mays] gi|414884380|tpg|DAA60394.1| TPA: cellulose synthase7 [Zea mays]	84.35	2790	45.71	0
	c41785_g1	gi|514731163|ref|XP_004957117.1| PREDICTED: cellulose synthase-like protein E6 [Setaria italica] gi|944260686|gb|KQL24943.1| hypothetical protein SETIT_029066mg [Setaria italica]	59.92	1365	35.64	6.78685e-51
	c42328_g1	gi|357111188|ref|XP_003557396.1| PREDICTED: probable cellulose synthase A catalytic subunit 8 [UDP-forming] isoform X1 [Brachypodium distachyon] gi|944085040|gb|KQK20392.1| hypothetical protein BRADI_1g54250 [Brachypodium distachyon]	87.63	2925	41.4	1.75145e-152
	c42520_g1	gi|672108403|ref|XP_008784981.1| PREDICTED: probable cellulose synthase A catalytic subunit 1 [UDP-forming] [Phoenix dactylifera]	43.36	1419	38.49	3.15552e-172
	c44572_g1	gi|414884378|tpg|DAA60392.1| TPA: cellulose synthase7 [Zea mays]	64.91	582	38.97	2.61182e-14
	c45204_g1	gi|1002255050|ref|XP_015631790.1| PREDICTED: probable cellulose synthase A catalytic subunit 5 [UDP-forming] [Oryza sativa Japonica Group] gi|75328327|sp|Q851L8.1|CESA5_ORYSJ RecName: Full=Probable cellulose synthase A catalytic subunit 5 [UDP-forming]; AltName: Full=OsCesA5 gi|171769909|sp|A2XNT2.1|CESA5_ORYSI RecName: Full=Probable cellulose synthase A catalytic subunit 5 [UDP-forming]; AltName…	85.9	3228	33.87	9.89991e-47
	c49021_g1	gi|924442993|gb|ALB78128.1| cellulose synthase catalytic subunit 1 [Miscanthus lutarioriparius]	96.27	3363	42.69	4.46188e-164
	c53648_g1	gi|924442995|gb|ALB78129.1| cellulose synthase catalytic subunit 1 [Miscanthus x giganteus]	47.71	1545	56.39	0
	c55497_g1	gi|270486536|gb|ACZ82298.1| cellulose synthase [Phyllostachys edulis]	85.61	2811	39.04	6.34798e-114
	c58573_g1	gi|270486538|gb|ACZ82299.1| cellulose synthase [Phyllostachys edulis]	60.18	1797	61.5	0
	c60958_g1	gi|162460417|ref|NP_001104954.1| cellulose synthase-1 [Zea mays] gi|9622874|gb|AAF89961.1|AF200525_1 cellulose synthase-1 [Zea mays]	30.33	1017	47.18	7.00581e-58
	c61245_g1	gi|721640076|ref|XP_003568832.2| PREDICTED: probable cellulose synthase A catalytic subunit 1 [UDP-forming] [Brachypodium distachyon] gi|944071787|gb|KQK07271.1| hypothetical protein BRADI_2g34240 [Brachypodium distachyon]	51.76	1653	42.24	3.99446e-103
	c62528_g1	gi|1008264368|gb|AMQ81243.1| cellulose synthase catalytic subunit 3 [Miscanthus x giganteus]	100	3222	99.63	0
	c63242_g1	gi|835905022|ref|XP_012703441.1| PREDICTED: cellulose synthase-like protein H1 isoform X1 [Setaria italica] gi|835905026|ref|XP_012703448.1| PREDICTED: cellulose synthase-like protein H1 isoform X1 [Setaria italica]	41.91	954	50.6	5.75245e-127
	c64687_g1	gi|670436479|ref|XP_008658883.1| PREDICTED: uncharacterized protein LOC100383550 isoform X1 [Zea mays] gi|413953515|gb|AFW86164.1| putative cellulose synthase-like family protein [Zea mays]	78.14	3030	34.22	9.19798e-72
	c67453_g1	gi|429326436|gb|AFZ78558.1| cellulose synthase [Populus tomentosa]	30.17	1032	53.28	1.0714e-140
	c67746_g1	gi|1002285018|ref|XP_015646807.1| PREDICTED: probable cellulose synthase A catalytic subunit 3 [UDP-forming] [Oryza sativa Japonica Group] gi|75322979|sp|Q69V23.1|CESA3_ORYSJ RecName: Full=Probable cellulose synthase A catalytic subunit 3 [UDP-forming]; AltName: Full=OsCesA3 gi|50509283|dbj|BAD30574.1| putative cellulose synthase [Oryza sativa Japonica Group] gi|113611023|dbj|BAF21401.1| Os07g042…	93.23	3111	51.85	0
	c68283_g1	gi|697100548|ref|XP_009591676.1| PREDICTED: LOW QUALITY PROTEIN: cellulose synthase A catalytic subunit 8 [UDP-forming]-like [Nicotiana tomentosiformis]	29.01	1320	36.12	9.58708e-75
	c68515_g1	gi|514731191|ref|XP_004957121.1| PREDICTED: cellulose synthase-like protein E6 [Setaria italica] gi|944260688|gb|KQL24945.1| hypothetical protein SETIT_029057mg [Setaria italica]	96.45	2190	41.08	1.34163e-115
	c71448_g1	gi|66269686|gb|AAY43220.1| cellulose synthase BoCesA4 [Bambusa oldhamii]	51.74	1728	41.32	6.0626e-125
	c72997_g1	gi|1008264374|gb|AMQ81246.1| cellulose synthase catalytic subunit 6 [Miscanthus x giganteus]	40.46	1323	97.51	0
	c74461_g1	gi|514731191|ref|XP_004957121.1| PREDICTED: cellulose synthase-like protein E6 [Setaria italica] gi|944260688|gb|KQL24945.1| hypothetical protein SETIT_029057mg [Setaria italica]	58.06	1380	38.83	2.12259e-94
	c75088_g1	gi|514731163|ref|XP_004957117.1| PREDICTED: cellulose synthase-like protein E6 [Setaria italica] gi|944260686|gb|KQL24943.1| hypothetical protein SETIT_029066mg [Setaria italica]	36.34	789	80.68	0
	c75294_g1	gi|9622880|gb|AAF89964.1|AF200528_1 cellulose synthase-4 [Zea mays]	93.59	3033	48.38	0
	c77859_g1	gi|670374469|ref|XP_008668614.1| PREDICTED: cellulose synthase-9 isoform X1 [Zea mays] gi|414588935|tpg|DAA39506.1| TPA: cellulose synthase9 [Zea mays]	97.03	3177	42.03	1.78753e-165
	c81402_g1	gi|1008264374|gb|AMQ81246.1| cellulose synthase catalytic subunit 6 [Miscanthus x giganteus]	93.76	3213	35.73	2.91789e-119
	c86059_g1	gi|514817627|ref|XP_004983532.1| PREDICTED: cellulose synthase-like protein D1 [Setaria italica] gi|944225332|gb|KQK89736.1| hypothetical protein SETIT_033974mg [Setaria italica]	31.98	1125	68.38	0
	c90145_g1	gi|835905022|ref|XP_012703441.1| PREDICTED: cellulose synthase-like protein H1 isoform X1 [Setaria italica] gi|835905026|ref|XP_012703448.1| PREDICTED: cellulose synthase-like protein H1 isoform X1 [Setaria italica]	90.85	2106	82.79	0
	c92473_g1	gi|685278778|ref|XP_009130327.1| PREDICTED: cellulose synthase-like protein D3 [Brassica rapa]	32.11	1152	40.25	2.22171e-131
	c94392_g1	gi|270486538|gb|ACZ82299.1| cellulose synthase [Phyllostachys edulis]	65.99	1941	43.18	4.26458e-142
	c96621_g1	gi|573939122|ref|XP_006651997.1| PREDICTED: probable cellulose synthase A catalytic subunit 5 [UDP-forming] [Oryza brachyantha]	99.18	3411	34.1	8.26958e-107
	c97966_g1	gi|514731163|ref|XP_004957117.1| PREDICTED: cellulose synthase-like protein E6 [Setaria italica] gi|944260686|gb|KQL24943.1| hypothetical protein SETIT_029066mg [Setaria italica]	58.39	1269	44.06	1.48305e-79
	c99126_g1	gi|514725695|ref|XP_004955797.1| PREDICTED: probable cellulose synthase A catalytic subunit 8 [UDP-forming] [Setaria italica] gi|944258719|gb|KQL22976.1| hypothetical protein SETIT_028770mg [Setaria italica]	82.7	2946	37.15	3.80336e-105
	c99258_g1	gi|514731163|ref|XP_004957117.1| PREDICTED: cellulose synthase-like protein E6 [Setaria italica] gi|944260686|gb|KQL24943.1| hypothetical protein SETIT_029066mg [Setaria italica]	59.36	1293	79.86	0
	c99511_g1	gi|670410029|ref|XP_008646188.1| PREDICTED: cellulose synthase-like protein E2 isoform X2 [Zea mays] gi|413938667|gb|AFW73218.1| hypothetical protein ZEAMMB73_369462 [Zea mays]	85.41	2061	37.57	2.11123e-71
	c99526_g1	gi|514731163|ref|XP_004957117.1| PREDICTED: cellulose synthase-like protein E6 [Setaria italica] gi|944260686|gb|KQL24943.1| hypothetical protein SETIT_029066mg [Setaria italica]	23.02	510	49.42	2.87663e-53
	c101015_g1	gi|514731163|ref|XP_004957117.1| PREDICTED: cellulose synthase-like protein E6 [Setaria italica] gi|944260686|gb|KQL24943.1| hypothetical protein SETIT_029066mg [Setaria italica]	57.84	1275	34.97	2.07849e-46
	c101323_g1	gi|225450119|ref|XP_002278997.1| PREDICTED: cellulose synthase A catalytic subunit 3 [UDP-forming] [Vitis vinifera]	26.64	897	60.33	2.4138e-150
	c103504_g1	gi|66269690|gb|AAY43222.1| cellulose synthase BoCesA5 [Bambusa oldhamii]	60.37	1965	75.23	0
	c104304_g1	gi|1008264374|gb|AMQ81246.1| cellulose synthase catalytic subunit 6 [Miscanthus x giganteus]	54.4	1779	86.4	0
	c105100_g1	gi|1002285198|ref|XP_015646894.1| PREDICTED: probable cellulose synthase A catalytic subunit 8 [UDP-forming] [Oryza sativa Japonica Group] gi|75149238|sp|Q84ZN6.1|CESA8_ORYSJ RecName: Full=Probable cellulose synthase A catalytic subunit 8 [UDP-forming]; AltName: Full=OsCesA8 gi|28411807|dbj|BAC57282.1| cellulose synthase-4 [Oryza sativa Japonica Group] gi|50509108|dbj|BAD30175.1| cellulose syntha…	50.14	1629	59.11	0
	c107219_g1	gi|514731163|ref|XP_004957117.1| PREDICTED: cellulose synthase-like protein E6 [Setaria italica] gi|944260686|gb|KQL24943.1| hypothetical protein SETIT_029066mg [Setaria italica]	31.21	678	58.44	9.80839e-154
	c109463_g1	gi|672108403|ref|XP_008784981.1| PREDICTED: probable cellulose synthase A catalytic subunit 1 [UDP-forming] [Phoenix dactylifera]	64.53	2046	51.67	0
	c110927_g1	gi|514759577|ref|XP_004964325.1| PREDICTED: cellulose synthase-like protein D2 [Setaria italica] gi|944244691|gb|KQL08985.1| hypothetical protein SETIT_005721mg [Setaria italica]	39.91	1404	52.13	0
	c111969_g1	gi|308737307|gb|ADO34997.1| cellulose synthase-like protein H1 [Avena sativa]	27.04	621	60.66	2.21123e-123
	c114742_g1	gi|9622882|gb|AAF89965.1|AF200529_1 cellulose synthase-5 [Zea mays]	64.41	2139	45.12	1.59854e-112
	c117731_g1	gi|251766021|gb|ACT16001.1| cellulose synthase [Phyllostachys edulis]	7.1	240	60	4.76685e-36
	c117971_g1	gi|514731163|ref|XP_004957117.1| PREDICTED: cellulose synthase-like protein E6 [Setaria italica] gi|944260686|gb|KQL24943.1| hypothetical protein SETIT_029066mg [Setaria italica]	55.89	1296	38.64	3.29614e-58
	c120176_g1	gi|514745194|ref|XP_004960821.1| PREDICTED: probable cellulose synthase A catalytic subunit 1 [UDP-forming] [Setaria italica] gi|944249523|gb|KQL13786.1| hypothetical protein SETIT_021050mg [Setaria italica]	78.09	2574	43.76	1.58587e-159
	c120965_g1	gi|37725361|gb|AAO25536.1| cellulose synthase [Populus tremuloides]	78.86	2793	40.48	2.7696e-133
	c122009_g1	gi|1008264376|gb|AMQ81247.1| cellulose synthase catalytic subunit 7 [Miscanthus x giganteus]	61.91	1941	95.69	0
	c123245_g1	gi|16519225|gb|AAL25129.1|AF432500_1 cellulose synthase-like protein OsCslE1 [Oryza sativa]	62.6	1392	43.27	2.00928e-156
	c124294_g1	gi|743926059|ref|XP_011007182.1| PREDICTED: cellulose synthase-like protein H1 [Populus euphratica]	13.2	300	61	2.57622e-120
	c128287_g1	gi|514731163|ref|XP_004957117.1| PREDICTED: cellulose synthase-like protein E6 [Setaria italica] gi|944260686|gb|KQL24943.1| hypothetical protein SETIT_029066mg [Setaria italica]	81.14	1851	34.86	5.03243e-56
	c129063_g1	gi|1008264372|gb|AMQ81245.1| cellulose synthase catalytic subunit 5 [Miscanthus x giganteus]	58.89	1989	45.11	2.1048e-177
	c129075_g1	gi|514726777|ref|XP_004956060.1| PREDICTED: probable cellulose synthase A catalytic subunit 3 [UDP-forming] isoform X1 [Setaria italica] gi|944259116|gb|KQL23373.1| hypothetical protein SETIT_028764mg [Setaria italica]	92.74	3099	43.67	5.85551e-180
	c132115_g1	gi|224923759|gb|ACN67534.1| cellulose synthase-like protein H1 [Hordeum vulgare subsp. vulgare]	19.57	465	50.32	3.44885e-79
	c133771_g1	gi|357110682|ref|XP_003557145.1| PREDICTED: cellulose synthase-like protein D2 [Brachypodium distachyon] gi|944084389|gb|KQK19741.1| hypothetical protein BRADI_1g50170 [Brachypodium distachyon]	89.68	3333	38.89	3.38137e-160
	c133954_g1	gi|213522385|gb|AAY43224.2| cellulose synthase BoCesA7 [Bambusa oldhamii]	33.7	1098	67.72	0
	c135432_g1	gi|162460818|ref|NP_001104957.1| cellulose synthase 7 [Zea mays] gi|9622886|gb|AAF89967.1|AF200531_1 cellulose synthase-7 [Zea mays] gi|414884380|tpg|DAA60394.1| TPA: cellulose synthase7 [Zea mays]	54.6	1932	33.88	4.13178e-130
	c136201_g1	gi|695077257|ref|XP_009385959.1| PREDICTED: probable cellulose synthase A catalytic subunit 5 [UDP-forming] [Musa acuminata subsp. malaccensis]	40.6	1386	37.92	8.51058e-52
	c137239_g1	gi|514731163|ref|XP_004957117.1| PREDICTED: cellulose synthase-like protein E6 [Setaria italica] gi|944260686|gb|KQL24943.1| hypothetical protein SETIT_029066mg [Setaria italica]	5.83	126	73.81	5.86417e-17
	c139973_g1	gi|670410029|ref|XP_008646188.1| PREDICTED: cellulose synthase-like protein E2 isoform X2 [Zea mays] gi|413938667|gb|AFW73218.1| hypothetical protein ZEAMMB73_369462 [Zea mays]	86.35	1983	38.45	4.18491e-76
	c140050_g1	gi|308737307|gb|ADO34997.1| cellulose synthase-like protein H1 [Avena sativa]	24.67	567	61.38	1.02447e-158
	c142919_g1	gi|226502156|ref|NP_001147894.1| CSLE6 - cellulose synthase-like family E [Zea mays] gi|195614436|gb|ACG29048.1| CSLE6 - cellulose synthase-like family E [Zea mays]	37.47	825	37.72	1.94343e-50
	c144358_g1	gi|171769905|sp|A2YU42.1|CSLD2_ORYSI RecName: Full=Cellulose synthase-like protein D2; AltName: Full=OsCslD2 gi|125561155|gb|EAZ06603.1| hypothetical protein OsI_28847 [Oryza sativa Indica Group]	62.56	2292	34.42	9.84475e-97
	c145175_g1	gi|213522385|gb|AAY43224.2| cellulose synthase BoCesA7 [Bambusa oldhamii]	46.78	1635	61.79	0
	c145936_g1	gi|514731191|ref|XP_004957121.1| PREDICTED: cellulose synthase-like protein E6 [Setaria italica] gi|944260688|gb|KQL24945.1| hypothetical protein SETIT_029057mg [Setaria italica]	20.36	441	67.11	1.75252e-175
	c149210_g1	gi|9622882|gb|AAF89965.1|AF200529_1 cellulose synthase-5 [Zea mays]	56.51	1926	39.56	4.81444e-73
	c151113_g1	gi|39726035|gb|AAR29967.1| putative cellulose synthase catalytic subunit [Hordeum vulgare]	59.59	2088	38.21	4.42325e-73
	c154246_g1	gi|976899757|gb|KVH88148.1| Cellulose synthase [Cynara cardunculus var. scolymus]	11.6	390	62.41	8.13927e-76
	c155812_g1	gi|1008264368|gb|AMQ81243.1| cellulose synthase catalytic subunit 3 [Miscanthus x giganteus]	99.72	3234	58.15	0
	c157053_g1	gi|357154038|ref|XP_003576649.1| PREDICTED: cellulose synthase-like protein E6 [Brachypodium distachyon] gi|944055012|gb|KQJ90650.1| hypothetical protein BRADI_4g33090 [Brachypodium distachyon]	25.1	552	70.11	0
	c157327_g1	gi|721640076|ref|XP_003568832.2| PREDICTED: probable cellulose synthase A catalytic subunit 1 [UDP-forming] [Brachypodium distachyon] gi|944071787|gb|KQK07271.1| hypothetical protein BRADI_2g34240 [Brachypodium distachyon]	87.29	2790	44.26	0
	c157440_g1	gi|270486538|gb|ACZ82299.1| cellulose synthase [Phyllostachys edulis]	41.96	1227	64.56	1.39202e-148
	c163402_g1	gi|514731163|ref|XP_004957117.1| PREDICTED: cellulose synthase-like protein E6 [Setaria italica] gi|944260686|gb|KQL24943.1| hypothetical protein SETIT_029066mg [Setaria italica]	95.15	2163	32.91	1.83706e-59
	c165497_g1	gi|514731163|ref|XP_004957117.1| PREDICTED: cellulose synthase-like protein E6 [Setaria italica] gi|944260686|gb|KQL24943.1| hypothetical protein SETIT_029066mg [Setaria italica]	36.34	789	80.68	0
	c169978_g1	gi|1008264374|gb|AMQ81246.1| cellulose synthase catalytic subunit 6 [Miscanthus x giganteus]	88.81	3087	35.92	4.26474e-82
	c171807_g1	gi|960489435|ref|XP_003576648.3| PREDICTED: cellulose synthase-like protein E6 [Brachypodium distachyon] gi|944055009|gb|KQJ90647.1| hypothetical protein BRADI_4g33080 [Brachypodium distachyon]	77.88	1782	38.05	1.54404e-85
	c172948_g1	gi|1008264368|gb|AMQ81243.1| cellulose synthase catalytic subunit 3 [Miscanthus x giganteus]	90.97	3000	48.2	0
	c175185_g1	gi|924442995|gb|ALB78129.1| cellulose synthase catalytic subunit 1 [Miscanthus x giganteus]	92.72	3051	44.11	1.03859e-175
	c175910_g1	gi|960489435|ref|XP_003576648.3| PREDICTED: cellulose synthase-like protein E6 [Brachypodium distachyon] gi|944055009|gb|KQJ90647.1| hypothetical protein BRADI_4g33080 [Brachypodium distachyon]	39.29	963	40.55	1.59297e-62
	c178561_g1	gi|573958286|ref|XP_006661350.1| PREDICTED: cellulose synthase-like protein E6 [Oryza brachyantha]	91.46	2229	29.93	9.41734e-37
	c178987_g1	gi|357154038|ref|XP_003576649.1| PREDICTED: cellulose synthase-like protein E6 [Brachypodium distachyon] gi|944055012|gb|KQJ90650.1| hypothetical protein BRADI_4g33090 [Brachypodium distachyon]	55.31	1218	48.28	6.30539e-96
	c179108_g1	gi|475626207|gb|EMT33243.1| Cellulose synthase-like protein E6 [Aegilops tauschii]	88.27	2052	33.61	1.56505e-58
	c179838_g1	gi|475599196|gb|EMT24169.1| Cellulose synthase-like protein D2 [Aegilops tauschii]	19.22	531	56.42	2.11262e-128
	c182303_g1	gi|1008264372|gb|AMQ81245.1| cellulose synthase catalytic subunit 5 [Miscanthus x giganteus]	99.54	3225	99.53	0
	c184472_g1	gi|1002285018|ref|XP_015646807.1| PREDICTED: probable cellulose synthase A catalytic subunit 3 [UDP-forming] [Oryza sativa Japonica Group] gi|75322979|sp|Q69V23.1|CESA3_ORYSJ RecName: Full=Probable cellulose synthase A catalytic subunit 3 [UDP-forming]; AltName: Full=OsCesA3 gi|50509283|dbj|BAD30574.1| putative cellulose synthase [Oryza sativa Japonica Group] gi|113611023|dbj|BAF21401.1| Os07g042…	60.29	2085	42	0
	c186483_g1	gi|413948739|gb|AFW81388.1| cellulose synthase1 [Zea mays]	96.28	3132	40.41	2.2624e-148
	c186781_g1	gi|22539080|gb|AAN01252.1| Unknown protein similar to putative cellulose synthase [Oryza sativa Japonica Group]	18.29	510	51.46	1.16072e-83
	c187503_g1	gi|270486538|gb|ACZ82299.1| cellulose synthase [Phyllostachys edulis]	92.57	2703	60.92	0
	c189721_g1	gi|514731163|ref|XP_004957117.1| PREDICTED: cellulose synthase-like protein E6 [Setaria italica] gi|944260686|gb|KQL24943.1| hypothetical protein SETIT_029066mg [Setaria italica]	83.91	1833	40.55	1.1714e-118
	c190424_g1	gi|530278703|gb|AGT16647.1| cellulose synthase [Saccharum hybrid cultivar R570]	46.51	1539	42.48	3.75173e-145
	c191242_g1	gi|1008264370|gb|AMQ81244.1| cellulose synthase catalytic subunit 4 [Miscanthus x giganteus]	83.53	2865	41.79	1.11125e-127
	c193814_g1	gi|1008264376|gb|AMQ81247.1| cellulose synthase catalytic subunit 7 [Miscanthus x giganteus]	99.45	3267	49.27	0
	c196496_g1	gi|1008264368|gb|AMQ81243.1| cellulose synthase catalytic subunit 3 [Miscanthus x giganteus]	99.44	3252	45.06	0
	c198083_g1	gi|66269690|gb|AAY43222.1| cellulose synthase BoCesA5 [Bambusa oldhamii]	19.35	618	73.02	0
	c198374_g1	gi|251766023|gb|ACT16002.1| cellulose synthase [Phyllostachys edulis]	44.22	1722	38.16	2.67041e-54
	c198536_g1	gi|514731163|ref|XP_004957117.1| PREDICTED: cellulose synthase-like protein E6 [Setaria italica] gi|944260686|gb|KQL24943.1| hypothetical protein SETIT_029066mg [Setaria italica]	96.95	2154	37.3	1.19824e-90
	c201888_g1	gi|1002278054|ref|XP_015643356.1| PREDICTED: cellulose synthase-like protein D2 [Oryza sativa Japonica Group] gi|1002278056|ref|XP_015643357.1| PREDICTED: cellulose synthase-like protein D2 [Oryza sativa Japonica Group] gi|75174372|sp|Q9LHZ7.1|CSLD2_ORYSJ RecName: Full=Cellulose synthase-like protein D2; AltName: Full=OsCslD2 gi|7363283|dbj|BAA93027.1| putative cellulose synthase [Oryza sativa Ja…	39.74	1461	46.31	4.68958e-149
	c202473_g1	gi|162460995|ref|NP_001104959.1| cellulose synthase-9 [Zea mays] gi|9622890|gb|AAF89969.1|AF200533_1 cellulose synthase-9 [Zea mays]	53.38	1842	40.03	3.82635e-128
	c202530_g1	gi|960456721|ref|XP_014752441.1| PREDICTED: probable cellulose synthase A catalytic subunit 3 [UDP-forming] isoform X1 [Brachypodium distachyon] gi|944081149|gb|KQK16501.1| hypothetical protein BRADI_1g29060 [Brachypodium distachyon] gi|944081150|gb|KQK16502.1| hypothetical protein BRADI_1g29060 [Brachypodium distachyon]	84.1	2547	56.93	0
	c204252_g1	gi|162460818|ref|NP_001104957.1| cellulose synthase 7 [Zea mays] gi|9622886|gb|AAF89967.1|AF200531_1 cellulose synthase-7 [Zea mays] gi|414884380|tpg|DAA60394.1| TPA: cellulose synthase7 [Zea mays]	97.79	3282	39.35	8.84745e-148
	c204355_g1	gi|37725361|gb|AAO25536.1| cellulose synthase [Populus tremuloides]	41.83	1356	62.71	0
	c205243_g1	gi|721640076|ref|XP_003568832.2| PREDICTED: probable cellulose synthase A catalytic subunit 1 [UDP-forming] [Brachypodium distachyon] gi|944071787|gb|KQK07271.1| hypothetical protein BRADI_2g34240 [Brachypodium distachyon]	59.83	1935	57.29	0
	c206682_g1	gi|672125988|ref|XP_008786432.1| PREDICTED: cellulose synthase-like protein D2 [Phoenix dactylifera] gi|672125990|ref|XP_008786433.1| PREDICTED: cellulose synthase-like protein D2 [Phoenix dactylifera] gi|672125992|ref|XP_008786434.1| PREDICTED: cellulose synthase-like protein D2 [Phoenix dactylifera]	43.21	1488	50.76	0
	c211045_g1	gi|66269686|gb|AAY43220.1| cellulose synthase BoCesA4 [Bambusa oldhamii]	61.17	2058	37.34	1.3427e-105
	c212418_g1	gi|226502156|ref|NP_001147894.1| CSLE6 - cellulose synthase-like family E [Zea mays] gi|195614436|gb|ACG29048.1| CSLE6 - cellulose synthase-like family E [Zea mays]	42.42	963	37.96	2.29103e-72
	c213839_g1	gi|670421874|ref|XP_008651867.1| PREDICTED: cellulose synthase-4 isoform X1 [Zea mays]	85.06	2316	40.7	2.94168e-95
	c213872_g1	gi|514731163|ref|XP_004957117.1| PREDICTED: cellulose synthase-like protein E6 [Setaria italica] gi|944260686|gb|KQL24943.1| hypothetical protein SETIT_029066mg [Setaria italica]	97.92	2220	33.38	5.25366e-69
	c214082_g1	gi|1035943042|gb|OAY68529.1| Cellulose synthase-like protein D2 [Ananas comosus]	46.72	1626	75.88	0
	c214580_g1	gi|514731163|ref|XP_004957117.1| PREDICTED: cellulose synthase-like protein E6 [Setaria italica] gi|944260686|gb|KQL24943.1| hypothetical protein SETIT_029066mg [Setaria italica]	63.8	1386	80.13	0
	c217362_g1	gi|1008264368|gb|AMQ81243.1| cellulose synthase catalytic subunit 3 [Miscanthus x giganteus]	59.4	1914	98.43	0
	c217419_g1	gi|772311348|gb|AJW81204.1| putative cellulose synthase-like protein D2 [Hordeum vulgare subsp. vulgare]	78.62	2976	34.95	3.67783e-104
	c218978_g1	gi|670410031|ref|XP_008646189.1| PREDICTED: cellulose synthase-like protein E2 isoform X3 [Zea mays]	38.07	732	90.98	0
	c221226_g1	gi|743809303|ref|XP_011018474.1| PREDICTED: cellulose synthase-like protein D3 [Populus euphratica] gi|743809307|ref|XP_011018475.1| PREDICTED: cellulose synthase-like protein D3 [Populus euphratica] gi|743809311|ref|XP_011018476.1| PREDICTED: cellulose synthase-like protein D3 [Populus euphratica] gi|743809315|ref|XP_011018477.1| PREDICTED: cellulose synthase-like protein D3 [Populus euphratica]…	27.8	942	37.3	7.57532e-117
	c221273_g1	gi|670410031|ref|XP_008646189.1| PREDICTED: cellulose synthase-like protein E2 isoform X3 [Zea mays]	46.49	1044	50.84	3.50068e-76
	c222434_g1	gi|514771227|ref|XP_004967197.1| PREDICTED: putative cellulose synthase A catalytic subunit 11 [UDP-forming], partial [Setaria italica]	23.38	825	46.55	7.17849e-71
	c222762_g1	gi|731356227|ref|XP_010689561.1| PREDICTED: cellulose synthase A catalytic subunit 1 [UDP-forming] [Beta vulgaris subsp. vulgaris] gi|870849891|gb|KMT02076.1| hypothetical protein BVRB_9g208050 [Beta vulgaris subsp. vulgaris]	69.24	2373	36.5	2.20074e-79
	c222948_g1	gi|514731163|ref|XP_004957117.1| PREDICTED: cellulose synthase-like protein E6 [Setaria italica] gi|944260686|gb|KQL24943.1| hypothetical protein SETIT_029066mg [Setaria italica]	36.34	894	72.15	0
	c225180_g1	gi|475492890|gb|EMT03676.1| Putative cellulose synthase A catalytic subunit 1 (UDP-forming) [Aegilops tauschii]	38.7	1329	37.82	1.96264e-71
	c225774_g1	gi|514731163|ref|XP_004957117.1| PREDICTED: cellulose synthase-like protein E6 [Setaria italica] gi|944260686|gb|KQL24943.1| hypothetical protein SETIT_029066mg [Setaria italica]	60.06	1491	70.62	0
	c226359_g1	gi|223975687|gb|ACN32031.1| unknown [Zea mays] gi|414885929|tpg|DAA61943.1| TPA: CSLE6-cellulose synthase-like family E [Zea mays]	74	1692	33.9	9.95926e-61
	c226499_g1	gi|1008264376|gb|AMQ81247.1| cellulose synthase catalytic subunit 7 [Miscanthus x giganteus]	98.71	3201	46.73	0
	c227919_g1	gi|719981152|ref|XP_010250039.1| PREDICTED: probable cellulose synthase A catalytic subunit 1 [UDP-forming] [Nelumbo nucifera]	78.62	2610	35.41	1.76852e-99
	c228985_g1	gi|502136908|ref|XP_004502891.1| PREDICTED: cellulose synthase A catalytic subunit 2 [UDP-forming]-like [Cicer arietinum]	36.16	1218	46.67	3.62416e-137
	c229645_g1	gi|960456721|ref|XP_014752441.1| PREDICTED: probable cellulose synthase A catalytic subunit 3 [UDP-forming] isoform X1 [Brachypodium distachyon] gi|944081149|gb|KQK16501.1| hypothetical protein BRADI_1g29060 [Brachypodium distachyon] gi|944081150|gb|KQK16502.1| hypothetical protein BRADI_1g29060 [Brachypodium distachyon]	92.25	2904	52.21	0
	c232665_g1	gi|720033101|ref|XP_010266321.1| PREDICTED: probable cellulose synthase A catalytic subunit 3 [UDP-forming] isoform X1 [Nelumbo nucifera]	41	1431	38.73	1.4098e-102
	c234662_g1	gi|1008264376|gb|AMQ81247.1| cellulose synthase catalytic subunit 7 [Miscanthus x giganteus]	67.53	2223	48.03	0
	c234702_g1	gi|475350006|gb|EMT00418.1| Putative cellulose synthase A catalytic subunit 2 (UDP-forming) [Aegilops tauschii]	56.01	2076	39.37	1.82742e-131
	c234904_g1	gi|1008264372|gb|AMQ81245.1| cellulose synthase catalytic subunit 5 [Miscanthus x giganteus]	35.56	1152	98.96	0
	c235692_g1	gi|1008264372|gb|AMQ81245.1| cellulose synthase catalytic subunit 5 [Miscanthus x giganteus]	43.15	1398	86.2	0
	c236035_g1	gi|924442995|gb|ALB78129.1| cellulose synthase catalytic subunit 1 [Miscanthus x giganteus]	77.87	2508	56.28	0
	c236099_g1	gi|1002285018|ref|XP_015646807.1| PREDICTED: probable cellulose synthase A catalytic subunit 3 [UDP-forming] [Oryza sativa Japonica Group] gi|75322979|sp|Q69V23.1|CESA3_ORYSJ RecName: Full=Probable cellulose synthase A catalytic subunit 3 [UDP-forming]; AltName: Full=OsCesA3 gi|50509283|dbj|BAD30574.1| putative cellulose synthase [Oryza sativa Japonica Group] gi|113611023|dbj|BAF21401.1| Os07g042…	18.85	711	63.6	0
	c238639_g1	gi|721605072|ref|XP_010228012.1| PREDICTED: probable cellulose synthase A catalytic subunit 2 [UDP-forming] isoform X1 [Brachypodium distachyon] gi|944077220|gb|KQK12572.1| hypothetical protein BRADI_1g04597 [Brachypodium distachyon]	95.64	3375	35.07	1.60775e-109
	c239289_g1	gi|475578621|gb|EMT18146.1| Cellulose synthase-like protein E6 [Aegilops tauschii]	46.62	927	41.56	1.13605e-84
	c239691_g1	gi|225690808|gb|ACO06090.1| cellulose synthase, partial [Phyllostachys edulis]	18.5	603	42.79	7.53224e-43
	c245794_g1	gi|219810303|gb|ACL36368.1| cellulose synthase CesA10, partial [Bambusa oldhamii]	25.28	201	83.58	8.08546e-30
	c250243_g1	gi|694327796|ref|XP_009354747.1| PREDICTED: cellulose synthase A catalytic subunit 3 [UDP-forming]-like [Pyrus x bretschneideri] gi|694327798|ref|XP_009354748.1| PREDICTED: cellulose synthase A catalytic subunit 3 [UDP-forming]-like [Pyrus x bretschneideri]	6.93	225	100	4.93912e-42
	c251454_g1	gi|670419356|ref|XP_008650453.1| PREDICTED: putative cellulose synthase A catalytic subunit 11 [UDP-forming] [Zea mays]	10.19	258	94.19	9.74265e-33
	c252194_g1	gi|541135559|gb|AGV22109.1| cellulose synthase 7 [Betula luminifera]	6.45	210	97.14	2.4464e-40
	c252897_g1	gi|66269678|gb|AAY43216.1| cellulose synthase BoCesA8 [Bambusa oldhamii]	3.06	99	84.85	1.45043e-11
	c254335_g1	gi|695077257|ref|XP_009385959.1| PREDICTED: probable cellulose synthase A catalytic subunit 5 [UDP-forming] [Musa acuminata subsp. malaccensis]	6.32	207	65.22	6.43667e-14
	c257987_g1	gi|976913540|gb|KVH99793.1| Cellulose synthase [Cynara cardunculus var. scolymus]	8.35	255	69.41	1.43452e-25
	c259870_g1	gi|381354084|gb|AFG25777.1| cellulose synthase 3 [Bambusa emeiensis]	4.9	159	86.79	5.35523e-42
	c264847_g1	gi|357111188|ref|XP_003557396.1| PREDICTED: probable cellulose synthase A catalytic subunit 8 [UDP-forming] isoform X1 [Brachypodium distachyon] gi|944085040|gb|KQK20392.1| hypothetical protein BRADI_1g54250 [Brachypodium distachyon]	2.68	87	100	1.97474e-17
	c267934_g1	gi|657949205|ref|XP_008341815.1| PREDICTED: cellulose synthase-like protein G3 [Malus domestica]	22.86	504	95.83	1.80251e-110
	c271733_g1	gi|413917326|gb|AFW57258.1| putative cellulose synthase-like family protein, partial [Zea mays]	5.77	93	100	1.0924e-13
	c274793_g1	gi|721605075|ref|XP_010228016.1| PREDICTED: probable cellulose synthase A catalytic subunit 2 [UDP-forming] isoform X2 [Brachypodium distachyon]	4.12	132	90.91	2.14871e-17
	c274826_g1	gi|213522387|gb|AAY43223.2| cellulose synthase BoCesA6, partial [Bambusa oldhamii]	4.8	141	95.74	1.07398e-25
	c276530_g1	gi|657990872|ref|XP_008387657.1| PREDICTED: cellulose synthase A catalytic subunit 1 [UDP-forming]-like [Malus domestica]	15.95	366	98.36	1.46403e-78
	c279133_g1	gi|670425084|ref|XP_008653203.1| PREDICTED: probable mixed-linked glucan synthase 8 isoform X1 [Zea mays] gi|414887051|tpg|DAA63065.1| TPA: putative cellulose synthase-like family protein [Zea mays]	7.55	201	82.35	1.02732e-17
	c279609_g1	gi|296279098|gb|ADH04381.1| cellulose synthase 1B [Salix miyabeana]	24.08	315	100	4.03493e-75
	c279610_g1	gi|658000156|ref|XP_008392524.1| PREDICTED: LOW QUALITY PROTEIN: cellulose synthase A catalytic subunit 1 [UDP-forming]-like, partial [Malus domestica]	10.28	222	100	2.36926e-48
	c280207_g1	gi|1008264376|gb|AMQ81247.1| cellulose synthase catalytic subunit 7 [Miscanthus x giganteus]	3.22	105	100	2.32526e-18
	c283287_g1	gi|573939122|ref|XP_006651997.1| PREDICTED: probable cellulose synthase A catalytic subunit 5 [UDP-forming] [Oryza brachyantha]	4.09	135	93.33	1.50861e-19
	c283288_g1	gi|414589170|tpg|DAA39741.1| TPA: putative cellulose synthase family protein [Zea mays]	5.92	159	94.34	4.30705e-29
	c283289_g1	gi|414884379|tpg|DAA60393.1| TPA: cellulose synthase7 [Zea mays]	4.49	105	100	1.01454e-14
	c286990_g1	gi|657990872|ref|XP_008387657.1| PREDICTED: cellulose synthase A catalytic subunit 1 [UDP-forming]-like [Malus domestica]	15.56	357	99.16	5.17063e-68
	c287059_g1	gi|976913540|gb|KVH99793.1| Cellulose synthase [Cynara cardunculus var. scolymus]	7.06	225	64.1	1.05721e-21
	c288825_g1	gi|1008264374|gb|AMQ81246.1| cellulose synthase catalytic subunit 6 [Miscanthus x giganteus]	5.23	171	96.49	6.74214e-30
	c289505_g1	gi|670376400|ref|XP_008669410.1| PREDICTED: cellulose synthase-like protein H1 isoform X1 [Zea mays]	7.27	177	66.1	6.71874e-25
	c290698_g1	gi|1009174637|ref|XP_015868444.1| PREDICTED: probable cellulose synthase A catalytic subunit 1 [UDP-forming] [Ziziphus jujuba]	96.55	504	93.45	8.49767e-112
	c294776_g1	gi|530279490|gb|AGT17297.1| cellulose synthase [Saccharum hybrid cultivar R570]	9.77	192	95.52	3.64837e-16
	c296853_g1	gi|747069559|ref|XP_011081578.1| PREDICTED: cellulose synthase A catalytic subunit 1 [UDP-forming] [Sesamum indicum]	3.6	117	61.54	1.01674e-06
	c296854_g1	gi|747069559|ref|XP_011081578.1| PREDICTED: cellulose synthase A catalytic subunit 1 [UDP-forming] [Sesamum indicum]	3.6	117	61.54	1.26409e-06
	c300142_g1	gi|924442995|gb|ALB78129.1| cellulose synthase catalytic subunit 1 [Miscanthus x giganteus]	2.8	90	96.67	1.55903e-11
	c300771_g1	gi|514781896|ref|XP_004969957.1| PREDICTED: cellulose synthase A catalytic subunit 4 [UDP-forming] [Setaria italica] gi|944242682|gb|KQL06990.1| hypothetical protein SETIT_000179mg [Setaria italica]	5.09	150	94	8.69107e-32
	c312113_g1	gi|413934604|gb|AFW69155.1| putative cellulose synthase family protein [Zea mays]	13.25	390	98.46	1.41479e-77
	c312115_g1	gi|514730090|ref|XP_004956855.1| PREDICTED: cellulose synthase A catalytic subunit 9 [UDP-forming] [Setaria italica]	2.57	81	100	2.84215e-09
	c319148_g1	gi|670367123|ref|XP_008664938.1| PREDICTED: probable mixed-linked glucan synthase 7 [Zea mays] gi|414871343|tpg|DAA49900.1| TPA: putative cellulose synthase-like family protein [Zea mays]	7.99	201	86.57	7.19677e-36
	c319381_g1	gi|702333208|ref|XP_010054929.1| PREDICTED: probable cellulose synthase A catalytic subunit 1 [UDP-forming], partial [Eucalyptus grandis]	13.54	135	76.6	2.6405e-14
	c320249_g1	gi|694327796|ref|XP_009354747.1| PREDICTED: cellulose synthase A catalytic subunit 3 [UDP-forming]-like [Pyrus x bretschneideri] gi|694327798|ref|XP_009354748.1| PREDICTED: cellulose synthase A catalytic subunit 3 [UDP-forming]-like [Pyrus x bretschneideri]	14.7	477	99.37	2.8374e-83
	c320251_g1	gi|10643648|gb|AAG21097.1|AF233892_1 cellulose synthase [Nicotiana tabacum]	47.09	315	96.19	1.15846e-69
	c320252_g1	gi|734415210|gb|KHN37622.1| Cellulose synthase A catalytic subunit 3 [UDP-forming] [Glycine soja]	5.5	291	51.55	3.16921e-19
	c320255_g1	gi|734415210|gb|KHN37622.1| Cellulose synthase A catalytic subunit 3 [UDP-forming] [Glycine soja]	4.12	246	46.34	2.28561e-10
	c320258_g1	gi|923748489|ref|XP_013673513.1| PREDICTED: cellulose synthase A catalytic subunit 3 [UDP-forming]-like [Brassica napus]	4.45	192	65.62	6.56117e-26
	c320259_g1	gi|42565422|gb|AAS20984.1| cellulose synthase protein [Hyacinthus orientalis]	34.04	237	97.5	3.72284e-46
	c320724_g1	gi|1008264372|gb|AMQ81245.1| cellulose synthase catalytic subunit 5 [Miscanthus x giganteus]	3.24	105	97.14	1.61081e-14
	c324758_g1	gi|670438729|ref|XP_008659811.1| PREDICTED: cellulose synthase A catalytic subunit 5 [UDP-forming]-like isoform X2 [Zea mays]	42.74	1263	97.62	0
	c326991_g1	gi|702314783|ref|XP_010051648.1| PREDICTED: probable cellulose synthase A catalytic subunit 3 [UDP-forming] [Eucalyptus grandis]	28.16	234	94.87	2.59772e-44
	c326992_g1	gi|922372861|ref|XP_013458587.1| cellulose synthase-like protein [Medicago truncatula] gi|657391346|gb|KEH32618.1| cellulose synthase-like protein [Medicago truncatula]	7.37	228	58.02	1.75356e-18
	c326993_g1	gi|573939122|ref|XP_006651997.1| PREDICTED: probable cellulose synthase A catalytic subunit 5 [UDP-forming] [Oryza brachyantha]	2.91	96	100	2.3648e-19
	c326994_g1	gi|702314783|ref|XP_010051648.1| PREDICTED: probable cellulose synthase A catalytic subunit 3 [UDP-forming] [Eucalyptus grandis]	28.88	240	90	5.29563e-45
	c326995_g1	gi|414884379|tpg|DAA60393.1| TPA: cellulose synthase7 [Zea mays]	10	234	94.87	8.10165e-45
	c326996_g1	gi|414884379|tpg|DAA60393.1| TPA: cellulose synthase7 [Zea mays]	10	234	94.87	2.89224e-44
	c363022_g1	gi|670436479|ref|XP_008658883.1| PREDICTED: uncharacterized protein LOC100383550 isoform X1 [Zea mays] gi|413953515|gb|AFW86164.1| putative cellulose synthase-like family protein [Zea mays]	2.29	81	96.3	3.01342e-10
	c365025_g1	gi|530279490|gb|AGT17297.1| cellulose synthase [Saccharum hybrid cultivar R570]	85.57	1761	98.47	0
	c365029_g1	gi|530279490|gb|AGT17297.1| cellulose synthase [Saccharum hybrid cultivar R570]	82.36	1695	98.76	0
	c370498_g1	gi|1002282331|ref|XP_015645457.1| PREDICTED: probable mixed-linked glucan synthase 3 [Oryza sativa Japonica Group] gi|75135501|sp|Q6ZF85.1|CSLF3_ORYSJ RecName: Full=Probable mixed-linked glucan synthase 3; AltName: Full=1,3;1,4-beta-D-glucan synthase 3; AltName: Full=Cellulose synthase-like protein F3; AltName: Full=OsCslF3 gi|16519233|gb|AAL25133.1|AF432504_1 cellulose synthase-like protein OsCs…	41.47	1119	68.9	1.03498e-178
	c372496_g1	gi|414885515|tpg|DAA61529.1| TPA: putative cellulose synthase family protein [Zea mays]	13.92	423	91.16	8.92793e-73
	c372501_g1	gi|162464424|ref|NP_001105672.1| cellulose synthase10 [Zea mays] gi|38532100|gb|AAR23310.1| cellulose synthase catalytic subunit 10 [Zea mays]	36.73	1188	96.21	0
	c378688_g1	gi|802627222|ref|XP_012076601.1| PREDICTED: cellulose synthase A catalytic subunit 1 [UDP-forming] [Jatropha curcas] gi|643724411|gb|KDP33612.1| hypothetical protein JCGZ_07183 [Jatropha curcas]	8.3	270	96.67	9.18614e-55
	c378883_g1	gi|226507394|ref|NP_001147926.1| CSLF3 - cellulose synthase-like family F; beta1,3;1,4 glucan synthase [Zea mays] gi|195614638|gb|ACG29149.1| CSLF3 - cellulose synthase-like family F; beta1,3;1,4 glucan synthase [Zea mays] gi|238009780|gb|ACR35925.1| unknown [Zea mays] gi|414887056|tpg|DAA63070.1| TPA: putative cellulose synthase-like family protein [Zea mays]	9.45	243	100	4.23453e-49
	c381892_g1	gi|1009174637|ref|XP_015868444.1| PREDICTED: probable cellulose synthase A catalytic subunit 1 [UDP-forming] [Ziziphus jujuba]	61.49	318	95.33	1.53616e-63
	c388028_g1	gi|657949205|ref|XP_008341815.1| PREDICTED: cellulose synthase-like protein G3 [Malus domestica]	9.39	207	92.75	4.59568e-37
	c389338_g1	gi|1035952998|gb|OAY75338.1| Cellulose synthase-like protein D2, partial [Ananas comosus]	11.79	276	61.96	5.15375e-27
	c389741_g1	gi|694364012|ref|XP_009361165.1| PREDICTED: cellulose synthase-like protein D3 [Pyrus x bretschneideri] gi|694364015|ref|XP_009361166.1| PREDICTED: cellulose synthase-like protein D3 [Pyrus x bretschneideri]	6.98	240	98.75	1.56214e-47
	c390392_g1	gi|414876094|tpg|DAA53225.1| TPA: cellulose synthase3 [Zea mays]	3.73	120	97.5	4.71414e-08
	c396436_g1	gi|694327796|ref|XP_009354747.1| PREDICTED: cellulose synthase A catalytic subunit 3 [UDP-forming]-like [Pyrus x bretschneideri] gi|694327798|ref|XP_009354748.1| PREDICTED: cellulose synthase A catalytic subunit 3 [UDP-forming]-like [Pyrus x bretschneideri]	5.36	174	96.55	8.48391e-33
	c401630_g1	gi|657966953|ref|XP_008375180.1| PREDICTED: cellulose synthase A catalytic subunit 3 [UDP-forming] [Malus domestica]	7.12	231	96.1	6.21603e-36
	c405258_g1	gi|922403033|ref|XP_013468652.1| cellulose synthase-like protein D3 [Medicago truncatula] gi|657403888|gb|KEH42689.1| cellulose synthase-like protein D3 [Medicago truncatula]	9.19	210	68.57	7.31883e-28
	c405305_g1	gi|657966953|ref|XP_008375180.1| PREDICTED: cellulose synthase A catalytic subunit 3 [UDP-forming] [Malus domestica]	4.99	162	100	1.29739e-32
	c407480_g1	gi|728847256|gb|KHG26699.1| putative cellulose synthase A catalytic subunit 8 [UDP-forming] [Gossypium arboreum]	42.86	198	95.45	9.38447e-39
Cellulase	c381_g1	gi|673921658|ref|NP_001288466.1| endoglucanase 12-like [Zea mays] gi|195616232|gb|ACG29946.1| glycoside transferase, six-hairpin, subgroup [Zea mays] gi|413920119|gb|AFW60051.1| glycoside transferase, six-hairpin, subgroup [Zea mays] gi|452891045|gb|AGG19096.1| cellulase [Zea mays]	100	1869	97.43	0
	c11582_g1	gi|673921445|ref|NP_001288403.1| endoglucanase 16-like precursor [Zea mays] gi|452891035|gb|AGG19091.1| cellulase [Zea mays]	89.3	1461	93.25	0
	c31013_g1	gi|673921445|ref|NP_001288403.1| endoglucanase 16-like precursor [Zea mays] gi|452891035|gb|AGG19091.1| cellulase [Zea mays]	28.6	465	72.26	7.0715e-124
	c31130_g1	gi|673921445|ref|NP_001288403.1| endoglucanase 16-like precursor [Zea mays] gi|452891035|gb|AGG19091.1| cellulase [Zea mays]	99.26	1608	90.24	0
	c173794_g1	gi|673921445|ref|NP_001288403.1| endoglucanase 16-like precursor [Zea mays] gi|452891035|gb|AGG19091.1| cellulase [Zea mays]	75.28	1311	43.71	1.2697e-51
	c253884_g1	gi|403326380|gb|AFR40578.1| cellulase, partial [Populus fremontii] gi|403326382|gb|AFR40579.1| cellulase, partial [Populus fremontii] gi|403326384|gb|AFR40580.1| cellulase, partial [Populus fremontii]	47.33	186	93.55	2.26155e-22
	c260924_g1	gi|393704375|gb|AFN16435.1| cellulase-like protein, partial [Panicum elephantipes]	28.68	111	94.59	9.35456e-17
	c295341_g1	gi|673921445|ref|NP_001288403.1| endoglucanase 16-like precursor [Zea mays] gi|452891035|gb|AGG19091.1| cellulase [Zea mays]	5.9	99	90.91	5.00064e-09
	c403684_g1	gi|673921658|ref|NP_001288466.1| endoglucanase 12-like [Zea mays] gi|195616232|gb|ACG29946.1| glycoside transferase, six-hairpin, subgroup [Zea mays] gi|413920119|gb|AFW60051.1| glycoside transferase, six-hairpin, subgroup [Zea mays] gi|452891045|gb|AGG19096.1| cellulase [Zea mays]	4.82	90	73.33	8.35975e-06
	c405842_g1	gi|393705329|gb|AFN16911.1| cellulase-like protein, partial [Panicum racemosum] gi|393705332|gb|AFN16912.1| cellulase-like protein, partial [Panicum racemosum]	31.78	102	67.65	1.78952e-06
	c38850_g1	gi|1002271507|ref|XP_015640087.1| PREDICTED: LOW QUALITY PROTEIN: COBRA-like protein 3 [Oryza sativa Japonica Group]	30.31	468	70.51	1.06808e-166
COBRA	c119872_g1	gi|1002271507|ref|XP_015640087.1| PREDICTED: LOW QUALITY PROTEIN: COBRA-like protein 3 [Oryza sativa Japonica Group]	23.82	366	90.16	2.42444e-166
	c143656_g1	gi|1002271507|ref|XP_015640087.1| PREDICTED: LOW QUALITY PROTEIN: COBRA-like protein 3 [Oryza sativa Japonica Group]	86.22	1317	44.78	6.36774e-92
	c161225_g1	gi|514735773|ref|XP_004958241.1| PREDICTED: COBRA-like protein 1 [Setaria italica]	56.42	765	68.22	5.18155e-158
	c215667_g1	gi|836026971|ref|XP_012698260.1| PREDICTED: LOW QUALITY PROTEIN: COBRA-like protein 7, partial [Setaria italica]	57.25	1137	41.41	4.67849e-56
	c225991_g1	gi|514813909|ref|XP_004981735.1| PREDICTED: COBRA-like protein 3 [Setaria italica] gi|944222651|gb|KQK87055.1| hypothetical protein SETIT_035669mg [Setaria italica]	71.49	1023	37.43	1.70089e-54
	c321796_g1	gi|514735773|ref|XP_004958241.1| PREDICTED: COBRA-like protein 1 [Setaria italica]	6.64	90	90	2.36999e-08
	c363425_g1	gi|162459408|ref|NP_001104946.1| brittle stalk-2-like protein 3 precursor [Zea mays] gi|119034638|gb|ABL59983.1| brittle stalk-2-like protein 3 [Zea mays] gi|414872882|tpg|DAA51439.1| TPA: COBRA-like protein 4 [Zea mays]	12.95	174	79.31	1.45025e-22
	c363426_g1	gi|670365793|ref|XP_008663686.1| PREDICTED: COBRA-like protein 3 [Zea mays]	26.5	159	96.23	2.2847e-28
	c379359_g1	gi|694317373|ref|XP_009338021.1| PREDICTED: protein COBRA-like [Pyrus x bretschneideri]	13.82	189	90.48	9.32103e-33
	c381290_g1	gi|694317373|ref|XP_009338021.1| PREDICTED: protein COBRA-like [Pyrus x bretschneideri]	19.3	264	98.86	1.63398e-54
	c397227_g1	gi|658032778|ref|XP_008351897.1| PREDICTED: COBRA-like protein 1 [Malus domestica]	40.66	333	100	3.95291e-76
	c405212_g1	gi|658001553|ref|XP_008393240.1| PREDICTED: protein COBRA-like [Malus domestica]	38.6	528	99.43	1.1976e-122
UDP-glycosyltransferase	c9249_g1	gi|1002274474|ref|XP_015641557.1| PREDICTED: UDP-glycosyltransferase TURAN isoform X2 [Oryza sativa Japonica Group]	44.61	636	79.25	5.78111e-179
	c21656_g1	gi|514723207|ref|XP_004955186.1| PREDICTED: UDP-glycosyltransferase 89B2-like [Setaria italica] gi|944267077|gb|KQL31317.1| hypothetical protein SETIT_019365mg [Setaria italica]	95.74	1380	62.26	8.52813e-143
	c22514_g1	gi|1002866014|ref|XP_006660236.2| PREDICTED: UDP-glycosyltransferase 89B2-like [Oryza brachyantha]	25.64	399	39.85	7.96143e-11
	c29022_g1	gi|514821623|ref|XP_004985489.1| PREDICTED: UDP-glycosyltransferase TURAN [Setaria italica] gi|944227895|gb|KQK92299.1| hypothetical protein SETIT_035510mg [Setaria italica]	24.36	507	48.54	8.17936e-71
	c30777_g1	gi|514809846|ref|XP_004979740.1| PREDICTED: UDP-glycosyltransferase 91C1-like [Setaria italica] gi|836014144|ref|XP_012703803.1| PREDICTED: UDP-glycosyltransferase 91C1-like [Setaria italica] gi|836014148|ref|XP_012703804.1| PREDICTED: UDP-glycosyltransferase 91C1-like [Setaria italica] gi|836014151|ref|XP_012703805.1| PREDICTED: UDP-glycosyltransferase 91C1-like [Setaria italica] gi|836014154|re…	97.29	1401	62.55	3.8568e-175
	c31889_g1	gi|670406532|ref|XP_008644820.1| PREDICTED: UDP-glycosyltransferase 86A1 [Zea mays] gi|413934136|gb|AFW68687.1| hypothetical protein ZEAMMB73_327986 [Zea mays]	77.33	1146	90.84	0
	c38974_g1	gi|357120552|ref|XP_003561991.1| PREDICTED: UDP-glycosyltransferase TURAN isoform X1 [Brachypodium distachyon] gi|944087960|gb|KQK23312.1| hypothetical protein BRADI_1g72620 [Brachypodium distachyon]	78.98	1164	37.25	2.3888e-45
	c54420_g1	gi|514809850|ref|XP_004979742.1| PREDICTED: UDP-glycosyltransferase 91C1-like [Setaria italica] gi|944231031|gb|KQK95417.1| hypothetical protein SETIT_026288mg [Setaria italica]	47.22	711	34.8	5.22544e-18
	c56244_g1	gi|357124717|ref|XP_003564044.1| PREDICTED: UDP-glycosyltransferase 73C5-like [Brachypodium distachyon] gi|944083492|gb|KQK18844.1| hypothetical protein BRADI_1g45090 [Brachypodium distachyon]	14.91	234	71.25	9.60241e-77
	c59938_g1	gi|960489916|ref|XP_003577390.2| PREDICTED: UDP-glycosyltransferase 72B1-like [Brachypodium distachyon] gi|944052304|gb|KQJ87942.1| hypothetical protein BRADI_4g14500 [Brachypodium distachyon]	82.75	1215	43.22	1.29141e-55
	c66449_g1	gi|1002252240|ref|XP_015630353.1| PREDICTED: UDP-glycosyltransferase TURAN isoform X1 [Oryza sativa Japonica Group] gi|1002252242|ref|XP_015630354.1| PREDICTED: UDP-glycosyltransferase TURAN isoform X2 [Oryza sativa Japonica Group] gi|108706513|gb|ABF94308.1| glycosyl transferase, group 1 family protein, expressed [Oryza sativa Japonica Group] gi|113547636|dbj|BAF11079.1| Os03g0180700 [Oryza sati…	44.4	630	62.74	2.02616e-161
	c71169_g1	gi|514800509|ref|XP_004975179.1| PREDICTED: UDP-glycosyltransferase 74F2-like [Setaria italica] gi|944232198|gb|KQK96560.1| hypothetical protein SETIT_010049mg [Setaria italica]	27.83	396	63.64	1.20497e-96
	c72285_g1	gi|514726262|ref|XP_004955936.1| PREDICTED: UDP-glycosyltransferase 91C1-like [Setaria italica] gi|944258953|gb|KQL23210.1| hypothetical protein SETIT_029576mg [Setaria italica]	96.02	1485	70.08	0
	c77943_g1	gi|357118238|ref|XP_003560863.1| PREDICTED: UDP-glycosyltransferase 708A6-like [Brachypodium distachyon] gi|944083425|gb|KQK18777.1| hypothetical protein BRADI_1g44630 [Brachypodium distachyon]	28.34	468	36.48	2.33453e-18
	c79159_g1	gi|836030901|ref|XP_004982120.2| PREDICTED: UDP-glycosyltransferase 91D1-like [Setaria italica] gi|944223229|gb|KQK87633.1| hypothetical protein SETIT_035772mg [Setaria italica]	85.98	1179	36.59	1.95943e-44
	c80903_g1	gi|514726262|ref|XP_004955936.1| PREDICTED: UDP-glycosyltransferase 91C1-like [Setaria italica] gi|944258953|gb|KQL23210.1| hypothetical protein SETIT_029576mg [Setaria italica]	95.63	1479	69.96	0
	c84819_g1	gi|836030901|ref|XP_004982120.2| PREDICTED: UDP-glycosyltransferase 91D1-like [Setaria italica] gi|944223229|gb|KQK87633.1| hypothetical protein SETIT_035772mg [Setaria italica]	97.47	1314	64.09	5.39031e-166
	c85458_g1	gi|960457667|ref|XP_014752582.1| PREDICTED: UDP-glycosyltransferase 88B1-like [Brachypodium distachyon] gi|944080752|gb|KQK16104.1| hypothetical protein BRADI_1g26760 [Brachypodium distachyon]	24.32	348	69.83	1.5847e-74
	c91456_g1	gi|514726262|ref|XP_004955936.1| PREDICTED: UDP-glycosyltransferase 91C1-like [Setaria italica] gi|944258953|gb|KQL23210.1| hypothetical protein SETIT_029576mg [Setaria italica]	96.02	1503	69.25	0
	c106930_g1	gi|514723207|ref|XP_004955186.1| PREDICTED: UDP-glycosyltransferase 89B2-like [Setaria italica] gi|944267077|gb|KQL31317.1| hypothetical protein SETIT_019365mg [Setaria italica]	44.47	627	70.81	1.66859e-128
	c109133_g1	gi|573960415|ref|XP_006662391.1| PREDICTED: UDP-glycosyltransferase 86A1 [Oryza brachyantha]	14.08	246	54.65	4.40928e-41
	c109500_g1	gi|514783224|ref|XP_004970291.1| PREDICTED: UDP-glycosyltransferase 87A2-like [Setaria italica] gi|944243073|gb|KQL07381.1| hypothetical protein SETIT_004951mg [Setaria italica]	54.64	792	46.15	8.83851e-96
	c125514_g1	gi|670424527|ref|XP_008652961.1| PREDICTED: UDP-glycosyltransferase 85A2-like isoform X2 [Zea mays]	35.96	495	53.49	3.80887e-66
	c129587_g1	gi|670378826|ref|XP_008670324.1| PREDICTED: UDP-glycosyltransferase 74F2-like [Zea mays] gi|414589987|tpg|DAA40558.1| TPA: hypothetical protein ZEAMMB73_121977 [Zea mays]	79.37	1227	38.52	6.26112e-34
	c136588_g1	gi|514723207|ref|XP_004955186.1| PREDICTED: UDP-glycosyltransferase 89B2-like [Setaria italica] gi|944267077|gb|KQL31317.1| hypothetical protein SETIT_019365mg [Setaria italica]	36.17	534	51.4	7.44892e-42
	c148703_g1	gi|514723207|ref|XP_004955186.1| PREDICTED: UDP-glycosyltransferase 89B2-like [Setaria italica] gi|944267077|gb|KQL31317.1| hypothetical protein SETIT_019365mg [Setaria italica]	33.19	462	45.66	9.58869e-29
	c151778_g1	gi|226495389|ref|NP_001148083.1| UDP-glycosyltransferase/ transferase, transferring glycosyl groups [Zea mays] gi|195615684|gb|ACG29672.1| UDP-glycosyltransferase/ transferase, transferring glycosyl groups [Zea mays] gi|413946235|gb|AFW78884.1| UDP-glycosyltransferase/ transferase [Zea mays]	98.55	1425	93.26	0
	c155643_g1	gi|670406532|ref|XP_008644820.1| PREDICTED: UDP-glycosyltransferase 86A1 [Zea mays] gi|413934136|gb|AFW68687.1| hypothetical protein ZEAMMB73_327986 [Zea mays]	47.17	699	92.7	0
	c164544_g1	gi|573949190|ref|XP_006656895.1| PREDICTED: UDP-glycosyltransferase 708A6-like [Oryza brachyantha]	31.09	492	40.24	6.32996e-35
	c176785_g1	gi|514723207|ref|XP_004955186.1| PREDICTED: UDP-glycosyltransferase 89B2-like [Setaria italica] gi|944267077|gb|KQL31317.1| hypothetical protein SETIT_019365mg [Setaria italica]	58.72	843	65.6	2.11593e-115
	c178134_g1	gi|670417042|ref|XP_008649392.1| PREDICTED: UDP-glycosyltransferase 73C3-like [Zea mays] gi|413944669|gb|AFW77318.1| hypothetical protein ZEAMMB73_777124 [Zea mays]	53.71	846	50.86	7.66936e-68
	c185135_g1	gi|672185124|ref|XP_008812736.1| PREDICTED: UDP-glycosyltransferase 73D1-like [Phoenix dactylifera]	22.68	339	39.17	2.77712e-18
	c188948_g1	gi|514809318|ref|XP_004979486.1| PREDICTED: UDP-glycosyltransferase 72B1-like [Setaria italica] gi|944230574|gb|KQK94960.1| hypothetical protein SETIT_026310mg [Setaria italica]	82.14	1272	31.19	5.75474e-21
	c196923_g1	gi|672175881|ref|XP_008808008.1| PREDICTED: UDP-glycosyltransferase 85A2-like [Phoenix dactylifera]	28.93	429	57.34	2.1597e-78
	c200462_g1	gi|514802770|ref|XP_004976277.1| PREDICTED: UDP-glycosyltransferase 73D1-like [Setaria italica] gi|944233785|gb|KQK98147.1| hypothetical protein SETIT_009942mg [Setaria italica]	77.73	1182	52.83	1.56615e-97
	c201055_g1	gi|474377084|gb|EMS64262.1| UDP-glycosyltransferase 85A2 [Triticum urartu]	43.81	633	33.48	3.62999e-42
	c217181_g1	gi|1002867618|ref|XP_015696423.1| PREDICTED: UDP-glycosyltransferase 74F2-like [Oryza brachyantha]	38.9	441	62	1.59503e-67
	c218702_g1	gi|514732208|ref|XP_004957373.1| PREDICTED: UDP-glycosyltransferase 74F1-like [Setaria italica]	51.52	717	83.68	6.55504e-143
	c218864_g1	gi|226495389|ref|NP_001148083.1| UDP-glycosyltransferase/ transferase, transferring glycosyl groups [Zea mays] gi|195615684|gb|ACG29672.1| UDP-glycosyltransferase/ transferase, transferring glycosyl groups [Zea mays] gi|413946235|gb|AFW78884.1| UDP-glycosyltransferase/ transferase [Zea mays]	66.18	963	39.46	6.11856e-62
	c227202_g1	gi|514723207|ref|XP_004955186.1| PREDICTED: UDP-glycosyltransferase 89B2-like [Setaria italica] gi|944267077|gb|KQL31317.1| hypothetical protein SETIT_019365mg [Setaria italica]	54.47	783	66.67	1.3186e-119
	c227270_g1	gi|187373038|gb|ACD03253.1| UDP-glycosyltransferase UGT85F13 [Avena strigosa]	42.65	636	51.42	3.44412e-72
	c227482_g1	gi|670417042|ref|XP_008649392.1| PREDICTED: UDP-glycosyltransferase 73C3-like [Zea mays] gi|413944669|gb|AFW77318.1| hypothetical protein ZEAMMB73_777124 [Zea mays]	49.22	762	55.91	3.36446e-104
	c229815_g1	gi|670441320|ref|XP_008660951.1| PREDICTED: UDP-glycosyltransferase 90A2-like [Zea mays]	83.66	1404	85.38	0
	c239078_g1	gi|357146397|ref|XP_003573977.1| PREDICTED: UDP-glycosyltransferase 86A1 isoform X1 [Brachypodium distachyon] gi|944061294|gb|KQJ96884.1| hypothetical protein BRADI_3g27610 [Brachypodium distachyon]	17.01	258	66.28	1.11218e-49
	c242084_g1	gi|359477998|ref|XP_003632051.1| PREDICTED: UDP-glycosyltransferase 92A1-like [Vitis vinifera]	16.53	246	58.54	1.73741e-18
	c242974_g1	gi|731323536|ref|XP_010672483.1| PREDICTED: UDP-glycosyltransferase 74E2-like [Beta vulgaris subsp. vulgaris] gi|870864447|gb|KMT15549.1| hypothetical protein BVRB_3g059010 [Beta vulgaris subsp. vulgaris]	13.97	192	81.25	6.68103e-32
	c244502_g1	gi|694310673|ref|XP_009354320.1| PREDICTED: UDP-glycosyltransferase 87A1-like [Pyrus x bretschneideri]	16.78	231	97.4	4.85629e-44
	c244921_g1	gi|590675064|ref|XP_007039341.1| UDP-Glycosyltransferase superfamily protein isoform 1 [Theobroma cacao] gi|508776586|gb|EOY23842.1| UDP-Glycosyltransferase superfamily protein isoform 1 [Theobroma cacao]	20.33	384	68.22	5.69948e-42
	c246970_g1	gi|514732208|ref|XP_004957373.1| PREDICTED: UDP-glycosyltransferase 74F1-like [Setaria italica]	8.44	117	87.18	4.01614e-14
	c279798_g1	gi|514816502|ref|XP_004982991.1| PREDICTED: UDP-glycosyltransferase 88B1-like [Setaria italica] gi|944224483|gb|KQK88887.1| hypothetical protein SETIT_039984mg [Setaria italica]	46.93	687	76.96	4.5097e-87
	c281713_g1	gi|514824466|ref|XP_004986891.1| PREDICTED: UDP-glycosyltransferase 73C5-like [Setaria italica] gi|944225963|gb|KQK90367.1| hypothetical protein SETIT_035284mg [Setaria italica]	48.03	738	76.92	3.04598e-126
	c294928_g1	gi|225464653|ref|XP_002276715.1| PREDICTED: UDP-glycosyltransferase 88A1-like [Vitis vinifera]	65.11	915	64.05	2.39898e-119
	c312799_g1	gi|514726262|ref|XP_004955936.1| PREDICTED: UDP-glycosyltransferase 91C1-like [Setaria italica] gi|944258953|gb|KQL23210.1| hypothetical protein SETIT_029576mg [Setaria italica]	6.36	96	78.12	6.0832e-10
	c322068_g1	gi|573923859|ref|XP_006649500.1| PREDICTED: UDP-glycosyltransferase TURAN [Oryza brachyantha]	6.34	90	86.67	2.44612e-11
	c360072_g1	gi|1002275283|ref|XP_015641956.1| PREDICTED: UDP-glycosyltransferase 89B2 [Oryza sativa Japonica Group] gi|55297301|dbj|BAD69131.1| putative UDP-glycosyltransferase [Oryza sativa Japonica Group] gi|125554919|gb|EAZ00525.1| hypothetical protein OsI_22543 [Oryza sativa Indica Group] gi|125596854|gb|EAZ36634.1| hypothetical protein OsJ_20980 [Oryza sativa Japonica Group] gi|215769480|dbj|BAH01709.1|…	8.3	120	87.5	5.07883e-14
	c380008_g1	gi|952950744|gb|ALO19890.1| UDP-glycosyltransferase 84A22 [Camellia sinensis]	15.81	231	90.91	1.57246e-43
	c382096_g1	gi|502127977|ref|XP_004499897.1| PREDICTED: anthocyanidin 3-O-glucoside 2&apos;&apos;-O-glucosyltransferase [Cicer arietinum] gi|533214754|gb|AGU14119.1| UDP-glycosyltransferase [Cicer arietinum]	15.07	207	71.01	4.11401e-28
	c383752_g1	gi|474033404|gb|EMS53033.1| UDP-glycosyltransferase 71B1 [Triticum urartu]	12.59	105	88.57	2.32408e-13
	c388522_g1	gi|658065272|ref|XP_008368591.1| PREDICTED: LOW QUALITY PROTEIN: UDP-glycosyltransferase 85A3-like [Malus domestica]	17.56	255	94.12	2.12079e-49
	c393446_g1	gi|514802794|ref|XP_004976289.1| PREDICTED: UDP-glycosyltransferase 82A1-like [Setaria italica] gi|944233803|gb|KQK98165.1| hypothetical protein SETIT_009868mg [Setaria italica]	21.44	318	81.58	1.08775e-51
	c394231_g1	gi|670396248|ref|XP_008678426.1| PREDICTED: UDP-glycosyltransferase 83A1-like [Zea mays] gi|413921755|gb|AFW61687.1| hypothetical protein ZEAMMB73_171555 [Zea mays]	19.07	264	78.02	9.9225e-32
	c398244_g1	gi|694399974|ref|XP_009375093.1| PREDICTED: UDP-glycosyltransferase 90A1-like [Pyrus x bretschneideri]	18.28	267	100	5.60653e-57
	c398363_g1	gi|514725564|ref|XP_004955765.1| PREDICTED: UDP-glycosyltransferase 91B1-like [Setaria italica] gi|944258660|gb|KQL22917.1| hypothetical protein SETIT_029677mg [Setaria italica]	17.43	255	69.41	1.98402e-27
	c399461_g1	gi|694414241|ref|XP_009335348.1| PREDICTED: UDP-glycosyltransferase 74E1-like [Pyrus x bretschneideri]	8.91	123	82.93	1.15214e-13
	c403642_g1	gi|514761907|ref|XP_004964903.1| PREDICTED: UDP-glycosyltransferase 73C3-like [Setaria italica]	14.46	219	87.67	2.99539e-39
	c109594_g1	gi|474390798|gb|EMS65289.1| UDP-sugar-dependent glycosyltransferase 52 [Triticum urartu]	39.97	777	64.86	6.18284e-147
	c182986_g1	gi|475521428|gb|EMT06624.1| UDP-sugar-dependent glycosyltransferase 52 [Aegilops tauschii]	22.74	399	90.98	1.50955e-165
KOBITO	c44445_g1	gi|835981031|ref|XP_004967383.2| PREDICTED: glycosyltransferase-like KOBITO 1 [Setaria italica] gi|944238922|gb|KQL03230.1| hypothetical protein SETIT_000927mg [Setaria italica]	72.01	1188	43.75	2.14752e-73
	c163052_g1	gi|1002871355|ref|XP_015697490.1| PREDICTED: glycosyltransferase-like KOBITO 1 [Oryza brachyantha]	20.82	291	90.72	4.71421e-139

## Sheet: Hemicellulose related genes
Additional file 2: Identification of the cell wall related genes and their representitive transcripts
Cell wall related gene family	Transcript ID	NR annotation	Query coverage (%)	Align Length	Identity	E-value
Xyloglucan endo-transglycosylase (XTH)	c568_g1	gi|413934723|gb|AFW69274.1| Xyloglucan endo-transglycosylase Xyloglucan endotransglucosylase/hydrolase protein 23 [Zea mays]	81.96	957	84.74	0
	c13470_g1	gi|514812407|ref|XP_004980998.1| PREDICTED: probable xyloglucan endotransglucosylase/hydrolase protein 30 [Setaria italica]	85.47	954	39.51	5.00608e-34
	c40193_g1	gi|530279254|gb|AGT17107.1| xyloglucan endotransglucosylase/hydrolase protein [Saccharum hybrid cultivar R570]	75.85	792	43.54	3.58492e-44
	c63834_g1	gi|578003863|gb|AHI04507.1| xyloglucan endotransglucosylase/hydrolase [Saccharum hybrid cultivar ROC22]	41.2	354	74.58	1.11458e-74
	c83145_g1	gi|573926797|ref|XP_006650922.1| PREDICTED: probable xyloglucan endotransglucosylase/hydrolase protein 30 [Oryza brachyantha]	25.62	282	85.11	1.06308e-77
	c105528_g1	gi|414867609|tpg|DAA46166.1| TPA: xyloglucan endotransglucosylase/hydrolase protein 32 [Zea mays]	38.12	384	89.23	8.79389e-120
	c109889_g1	gi|578003863|gb|AHI04507.1| xyloglucan endotransglucosylase/hydrolase [Saccharum hybrid cultivar ROC22]	90.14	768	96.88	0
	c173622_g1	gi|670364394|ref|XP_008658729.1| PREDICTED: probable xyloglucan endotransglucosylase/hydrolase protein 27 [Zea mays] gi|414867921|tpg|DAA46478.1| TPA: hypothetical protein ZEAMMB73_030943 [Zea mays]	38.33	399	91.73	7.60513e-139
	c192376_g1	gi|530279254|gb|AGT17107.1| xyloglucan endotransglucosylase/hydrolase protein [Saccharum hybrid cultivar R570]	88.24	858	93.71	9.30229e-179
	c198493_g1	gi|226503369|ref|NP_001150346.1| xyloglucan endotransglucosylase/hydrolase protein 5 [Zea mays] gi|195638572|gb|ACG38754.1| xyloglucan endotransglucosylase/hydrolase protein 5 precursor [Zea mays] gi|414864391|tpg|DAA42948.1| TPA: xyloglucan endotransglucosylase/hydrolase protein 5 [Zea mays]	87.6	657	89.5	8.60631e-117
	c210561_g1	gi|474404616|gb|EMS66374.1| putative xyloglucan endotransglucosylase/hydrolase protein 30 [Triticum urartu]	9.7	105	68.57	4.28239e-26
	c245625_g1	gi|694327449|ref|XP_009354593.1| PREDICTED: probable xyloglucan endotransglucosylase/hydrolase protein 6 [Pyrus x bretschneideri] gi|694327456|ref|XP_009354596.1| PREDICTED: probable xyloglucan endotransglucosylase/hydrolase protein 6 [Pyrus x bretschneideri]	15.99	141	100	1.00699e-25
	c249945_g1	gi|694327449|ref|XP_009354593.1| PREDICTED: probable xyloglucan endotransglucosylase/hydrolase protein 6 [Pyrus x bretschneideri] gi|694327456|ref|XP_009354596.1| PREDICTED: probable xyloglucan endotransglucosylase/hydrolase protein 6 [Pyrus x bretschneideri]	44.9	396	99.24	6.81511e-76
	c268892_g1	gi|734380107|gb|KHN22712.1| Putative xyloglucan endotransglucosylase/hydrolase protein 23 [Glycine soja]	99.65	843	71.83	1.63142e-151
	c271817_g1	gi|657993695|ref|XP_008389143.1| PREDICTED: LOW QUALITY PROTEIN: probable xyloglucan endotransglucosylase/hydrolase protein 28 [Malus domestica]	73.81	744	97.58	1.10746e-180
	c277520_g1	gi|658049038|ref|XP_008360204.1| PREDICTED: xyloglucan endotransglucosylase/hydrolase protein A-like [Malus domestica] gi|187372982|gb|ACD03225.1| xyloglucan endotransglucosylase/hydrolase 1 [Malus domestica]	63.27	558	98.92	1.25373e-135
	c287399_g1	gi|658309802|ref|NP_001280925.1| xyloglucan endotransglucosylase/hydrolase protein 9 precursor [Malus domestica] gi|187372990|gb|ACD03229.1| xyloglucan endotransglucosylase/hydrolase 5 [Malus domestica]	94.59	783	78.57	3.26915e-142
	c324621_g1	gi|473870110|gb|EMS47743.1| putative xyloglucan endotransglucosylase/hydrolase protein 32 [Triticum urartu]	29.65	201	95.52	4.01248e-37
	c324623_g1	gi|930945587|ref|NP_001151883.2| uncharacterized protein LOC100285520 precursor [Zea mays] gi|414886682|tpg|DAA62696.1| TPA: xyloglucan endotransglucosylase/hydrolase protein 32 [Zea mays]	37.26	351	96.58	1.27095e-74
	c324629_g1	gi|930945587|ref|NP_001151883.2| uncharacterized protein LOC100285520 precursor [Zea mays] gi|414886682|tpg|DAA62696.1| TPA: xyloglucan endotransglucosylase/hydrolase protein 32 [Zea mays]	37.58	354	95.76	5.15129e-75
	c324631_g1	gi|195650565|gb|ACG44750.1| xyloglucan endotransglucosylase/hydrolase protein 32 precursor [Zea mays]	16.72	159	92.45	9.54736e-26
	c342376_g1	gi|514767010|ref|XP_004966138.1| PREDICTED: probable xyloglucan endotransglucosylase/hydrolase protein 25 [Setaria italica]	92.1	819	91.58	1.88506e-178
	c342379_g1	gi|514767010|ref|XP_004966138.1| PREDICTED: probable xyloglucan endotransglucosylase/hydrolase protein 25 [Setaria italica]	92.1	819	90.84	8.27062e-179
	c391936_g1	gi|694327495|ref|XP_009354613.1| PREDICTED: probable xyloglucan endotransglucosylase/hydrolase protein 6 [Pyrus x bretschneideri]	34.01	300	99	3.32829e-68
	c392115_g1	gi|694351009|ref|XP_009357408.1| PREDICTED: probable xyloglucan endotransglucosylase/hydrolase protein 8 [Pyrus x bretschneideri] gi|694351012|ref|XP_009357409.1| PREDICTED: probable xyloglucan endotransglucosylase/hydrolase protein 8 [Pyrus x bretschneideri] gi|694426531|ref|XP_009340941.1| PREDICTED: probable xyloglucan endotransglucosylase/hydrolase protein 8 [Pyrus x bretschneideri] gi|752273…	23	207	100	1.42889e-42
	c396258_g1	gi|658027722|ref|XP_008349290.1| PREDICTED: probable xyloglucan endotransglucosylase/hydrolase protein 8 [Malus domestica]	28.33	255	98.82	4.128e-56
	c402907_g1	gi|514822771|ref|XP_004986046.1| PREDICTED: probable xyloglucan endotransglucosylase/hydrolase protein 32 [Setaria italica] gi|944228625|gb|KQK93029.1| hypothetical protein SETIT_038925mg [Setaria italica]	24.67	237	88.61	4.18922e-40
	c403500_g1	gi|670423849|ref|XP_008652681.1| PREDICTED: probable xyloglucan endotransglucosylase/hydrolase protein 28 [Zea mays] gi|414885325|tpg|DAA61339.1| TPA: hypothetical protein ZEAMMB73_897061 [Zea mays] gi|414885326|tpg|DAA61340.1| TPA: hypothetical protein ZEAMMB73_897061 [Zea mays]	21.64	222	97.3	4.37698e-44
	c117818_g1	gi|413917142|gb|AFW57074.1| xyloglucan endo-transglycosylase/hydrolase Precursor [Zea mays]	45.75	498	80.24	1.23089e-117
	c287708_g1	gi|194702166|gb|ACF85167.1| unknown [Zea mays] gi|238013188|gb|ACR37629.1| unknown [Zea mays] gi|413916818|gb|AFW56750.1| xyloglucan endotransglycosylase/hydrolase protein 8 [Zea mays]	14.63	126	95.24	8.0111e-21
	c22639_g1	gi|514792182|ref|XP_004972510.1| PREDICTED: xyloglucan endotransglycosylase/hydrolase protein 8-like [Setaria italica] gi|944235950|gb|KQL00288.1| hypothetical protein SETIT_014215mg [Setaria italica]	28.98	255	52.94	1.01145e-25
	c272936_g1	gi|195640132|gb|ACG39534.1| xyloglucan endotransglycosylase/hydrolase protein 8 precursor [Zea mays]	29.31	255	96.47	1.47495e-49
Xyloglucan 6-xylosyltransferase (XXT)	c165903_g1	gi|1012003691|ref|XP_015938535.1| PREDICTED: xyloglucan 6-xylosyltransferase 2-like [Arachis duranensis]	99.12	1338	64.44	0
	c385430_g1	gi|1029003000|ref|XP_016665433.1| PREDICTED: probable xyloglucan 6-xylosyltransferase 5 isoform X1 [Gossypium hirsutum] gi|1029003002|ref|XP_016665434.1| PREDICTED: probable xyloglucan 6-xylosyltransferase 5 isoform X2 [Gossypium hirsutum]	16.34	204	54.67	1.32596e-14
Xyloglucan glycosyltransferase (XGT)	c18305_g1	gi|586773722|ref|XP_006857056.1| PREDICTED: probable xyloglucan glycosyltransferase 12 [Amborella trichopoda] gi|548861139|gb|ERN18523.1| hypothetical protein AMTR_s00065p00054150 [Amborella trichopoda]	37.13	810	50.36	1.65601e-65
	c42557_g1	gi|530278346|gb|AGT16344.1| xyloglucan glycosyltransferase [Saccharum hybrid cultivar R570] gi|530278349|gb|AGT16347.1| xyloglucan glycosyltransferase [Saccharum hybrid cultivar R570]	43.62	912	82.03	0
	c178397_g1	gi|729372247|ref|XP_010548551.1| PREDICTED: probable xyloglucan glycosyltransferase 5 [Tarenaya hassleriana]	35.39	723	88.8	0
	c185846_g1	gi|743766734|ref|XP_010913613.1| PREDICTED: probable xyloglucan glycosyltransferase 5 [Elaeis guineensis]	50.71	1089	40.31	3.02887e-109
	c205800_g1	gi|530278346|gb|AGT16344.1| xyloglucan glycosyltransferase [Saccharum hybrid cultivar R570] gi|530278349|gb|AGT16347.1| xyloglucan glycosyltransferase [Saccharum hybrid cultivar R570]	47.92	1002	99.1	0
	c229058_g1	gi|530278346|gb|AGT16344.1| xyloglucan glycosyltransferase [Saccharum hybrid cultivar R570] gi|530278349|gb|AGT16347.1| xyloglucan glycosyltransferase [Saccharum hybrid cultivar R570]	50.07	1041	54.59	7.53225e-148
	c263436_g1	gi|694434671|ref|XP_009344546.1| PREDICTED: xyloglucan glycosyltransferase 4-like [Pyrus x bretschneideri] gi|694434692|ref|XP_009344556.1| PREDICTED: xyloglucan glycosyltransferase 4-like [Pyrus x bretschneideri]	14.48	288	100	4.92449e-58
	c365027_g1	gi|747070435|ref|XP_011082040.1| PREDICTED: probable xyloglucan glycosyltransferase 5 [Sesamum indicum]	11.4	237	97.47	2.06645e-49
	c139083_g1	gi|530278812|gb|AGT16737.1| xyloglucan galactosyltransferase [Saccharum hybrid cultivar R570] gi|530278813|gb|AGT16738.1| xyloglucan galactosyltransferase [Saccharum hybrid cultivar R570] gi|530278814|gb|AGT16739.1| xyloglucan galactosyltransferase [Saccharum hybrid cultivar R570]	100	1488	94.78	0
	c203414_g1	gi|530278812|gb|AGT16737.1| xyloglucan galactosyltransferase [Saccharum hybrid cultivar R570] gi|530278813|gb|AGT16738.1| xyloglucan galactosyltransferase [Saccharum hybrid cultivar R570] gi|530278814|gb|AGT16739.1| xyloglucan galactosyltransferase [Saccharum hybrid cultivar R570]	63.45	954	60.19	5.64191e-124
	c235671_g1	gi|514817999|ref|XP_004983711.1| PREDICTED: xyloglucan galactosyltransferase KATAMARI1 homolog [Setaria italica] gi|944225592|gb|KQK89996.1| hypothetical protein SETIT_035637mg [Setaria italica]	51.1	702	70.59	3.03429e-143
	c324709_g1	gi|743781139|ref|XP_010920782.1| PREDICTED: xyloglucan galactosyltransferase KATAMARI1 homolog [Elaeis guineensis]	7.89	126	64.29	2.90646e-07
	c351584_g1	gi|414871217|tpg|DAA49774.1| TPA: xyloglucan galactosyltransferase KATAMARI 1 [Zea mays]	7.8	126	71.43	5.43568e-14
	c351585_g1	gi|414871217|tpg|DAA49774.1| TPA: xyloglucan galactosyltransferase KATAMARI 1 [Zea mays]	7.8	126	71.43	5.38157e-14
	c351587_g1	gi|414871217|tpg|DAA49774.1| TPA: xyloglucan galactosyltransferase KATAMARI 1 [Zea mays]	7.8	126	71.43	1.70534e-13
	c351588_g1	gi|414871217|tpg|DAA49774.1| TPA: xyloglucan galactosyltransferase KATAMARI 1 [Zea mays]	7.8	126	71.43	3.37775e-06
	c387098_g1	gi|670387035|ref|XP_008674142.1| PREDICTED: xyloglucan galactosyltransferase KATAMARI1 homolog [Zea mays] gi|414877685|tpg|DAA54816.1| TPA: hypothetical protein ZEAMMB73_215549 [Zea mays]	17.42	258	85.87	2.31688e-46
Xylosyltransferase (XT)	c19310_g1	gi|226528998|ref|NP_001147601.1| xylosyltransferase 2 [Zea mays] gi|195612442|gb|ACG28051.1| xylosyltransferase 2 [Zea mays] gi|223974179|gb|ACN31277.1| unknown [Zea mays]	93.36	1350	90.67	0
	c62545_g1	gi|195615636|gb|ACG29648.1| xylosyltransferase oxt [Zea mays]	46.03	708	44.44	4.49596e-44
	c64472_g1	gi|83715783|emb|CAJ47422.1| Beta-1,2-xylosyltransferase, partial [Sorghum bicolor]	50.55	687	96.51	0
	c65895_g1	gi|226528998|ref|NP_001147601.1| xylosyltransferase 2 [Zea mays] gi|195612442|gb|ACG28051.1| xylosyltransferase 2 [Zea mays] gi|223974179|gb|ACN31277.1| unknown [Zea mays]	69.5	1008	73.43	6.03229e-177
	c76622_g1	gi|806638546|ref|NP_001105845.2| beta-1,2-xylosyltransferase [Zea mays] gi|414869360|tpg|DAA47917.1| TPA: beta-1,2-xylosyltransferase [Zea mays]	71.4	1107	41.49	2.44059e-65
	c78021_g1	gi|728820195|gb|KHG03625.1| putative beta-1,4-xylosyltransferase IRX10L [Gossypium arboreum]	25.48	441	81.63	0
	c88095_g1	gi|66393903|gb|AAY46028.1| beta 1,2-xylosyltransferase, partial [Zea mays]	83.17	804	44.64	5.37799e-44
	c97586_g1	gi|672195121|ref|XP_008776467.1| PREDICTED: probable beta-1,4-xylosyltransferase IRX10 isoform X1 [Phoenix dactylifera]	18.71	234	92.31	2.98116e-120
	c120886_g1	gi|226528998|ref|NP_001147601.1| xylosyltransferase 2 [Zea mays] gi|195612442|gb|ACG28051.1| xylosyltransferase 2 [Zea mays] gi|223974179|gb|ACN31277.1| unknown [Zea mays]	100	1446	95.23	0
	c165903_g1	gi|1012003691|ref|XP_015938535.1| PREDICTED: xyloglucan 6-xylosyltransferase 2-like [Arachis duranensis]	99.12	1338	64.44	0
	c168473_g1	gi|195615936|gb|ACG29798.1| beta-2-xylosyltransferase [Zea mays]	62.08	906	55.34	1.27435e-72
	c172612_g1	gi|226528998|ref|NP_001147601.1| xylosyltransferase 2 [Zea mays] gi|195612442|gb|ACG28051.1| xylosyltransferase 2 [Zea mays] gi|223974179|gb|ACN31277.1| unknown [Zea mays]	88.38	1278	96.95	0
	c175789_g1	gi|670386047|ref|XP_008673786.1| PREDICTED: xylosyltransferase 1 [Zea mays] gi|414876568|tpg|DAA53699.1| TPA: hypothetical protein ZEAMMB73_714327 [Zea mays]	69.65	837	87.5	1.41607e-160
	c177032_g1	gi|226528998|ref|NP_001147601.1| xylosyltransferase 2 [Zea mays] gi|195612442|gb|ACG28051.1| xylosyltransferase 2 [Zea mays] gi|223974179|gb|ACN31277.1| unknown [Zea mays]	76.76	1134	66.67	3.73958e-121
	c183595_g1	gi|924442887|ref|NP_001148073.2| xylosyltransferase oxt [Zea mays] gi|194706228|gb|ACF87198.1| unknown [Zea mays] gi|414875808|tpg|DAA52939.1| TPA: xylosyltransferase oxt [Zea mays]	26.57	372	58.65	2.14889e-53
	c193993_g1	gi|1028973867|ref|XP_016730398.1| PREDICTED: probable beta-1,4-xylosyltransferase IRX10 [Gossypium hirsutum]	34.54	429	86.01	1.05892e-121
	c223669_g1	gi|225460797|ref|XP_002275353.1| PREDICTED: beta-(1,2)-xylosyltransferase isoform X1 [Vitis vinifera]	96.12	1464	41.39	3.27387e-82
	c226246_g1	gi|823185558|ref|XP_012489571.1| PREDICTED: xylosyltransferase 1-like [Gossypium raimondii] gi|763773696|gb|KJB40819.1| hypothetical protein B456_007G078400 [Gossypium raimondii]	24.02	312	70.19	7.36715e-57
	c286172_g1	gi|83715783|emb|CAJ47422.1| Beta-1,2-xylosyltransferase, partial [Sorghum bicolor]	5.96	81	96.3	4.34609e-08
	c340876_g1	gi|670386047|ref|XP_008673786.1| PREDICTED: xylosyltransferase 1 [Zea mays] gi|414876568|tpg|DAA53699.1| TPA: hypothetical protein ZEAMMB73_714327 [Zea mays]	12.44	141	84	4.50872e-26
	c340878_g1	gi|670386047|ref|XP_008673786.1| PREDICTED: xylosyltransferase 1 [Zea mays] gi|414876568|tpg|DAA53699.1| TPA: hypothetical protein ZEAMMB73_714327 [Zea mays]	12.44	141	84	7.24744e-26
	c379634_g1	gi|694407159|ref|XP_009378336.1| PREDICTED: xylosyltransferase 1-like [Pyrus x bretschneideri]	16.27	204	100	1.04779e-40
	c384991_g1	gi|694401109|ref|XP_009375622.1| PREDICTED: UDP-D-xylose:L-fucose alpha-1,3-D-xylosyltransferase 2-like [Pyrus x bretschneideri]	14.65	189	100	3.81171e-36
	c385430_g1	gi|1029003000|ref|XP_016665433.1| PREDICTED: probable xyloglucan 6-xylosyltransferase 5 isoform X1 [Gossypium hirsutum] gi|1029003002|ref|XP_016665434.1| PREDICTED: probable xyloglucan 6-xylosyltransferase 5 isoform X2 [Gossypium hirsutum]	16.34	204	54.67	1.32596e-14
	c391554_g1	gi|694430499|ref|XP_009342725.1| PREDICTED: UDP-D-xylose:L-fucose alpha-1,3-D-xylosyltransferase 2-like [Pyrus x bretschneideri]	16.24	210	95.71	1.78481e-36
Glucan synthase (GS)	c1019_g1	gi|670373576|ref|XP_008668126.1| PREDICTED: alpha-1,4-glucan-protein synthase isoform X1 [Zea mays] gi|670373578|ref|XP_008668127.1| PREDICTED: alpha-1,4-glucan-protein synthase isoform X1 [Zea mays] gi|194705168|gb|ACF86668.1| unknown [Zea mays] gi|223947713|gb|ACN27940.1| unknown [Zea mays] gi|224029933|gb|ACN34042.1| unknown [Zea mays] gi|414584987|tpg|DAA35558.1| TPA: alpha-1,4-glucan-protein…	99.43	1053	53.24	7.38469e-95
	c11684_g1	gi|670373580|ref|XP_008668128.1| PREDICTED: alpha-1,4-glucan-protein synthase isoform X2 [Zea mays]	88.76	1302	34.6	2.19173e-37
	c27154_g1	gi|20330757|gb|AAM19120.1|AC104427_18 Putative glucan synthase [Oryza sativa Japonica Group] gi|108705978|gb|ABF93773.1| 1,3-beta-glucan synthase component family protein, expressed [Oryza sativa Japonica Group]	34.29	1614	52.36	0
	c75270_g1	gi|670373580|ref|XP_008668128.1| PREDICTED: alpha-1,4-glucan-protein synthase isoform X2 [Zea mays]	89.23	1251	38.46	9.47444e-46
	c96978_g1	gi|590669746|ref|XP_007037863.1| Glucan synthase-like 8 isoform 3 [Theobroma cacao] gi|508775108|gb|EOY22364.1| Glucan synthase-like 8 isoform 3 [Theobroma cacao]	4.95	276	84.78	4.62066e-115
	c118139_g1	gi|20330757|gb|AAM19120.1|AC104427_18 Putative glucan synthase [Oryza sativa Japonica Group] gi|108705978|gb|ABF93773.1| 1,3-beta-glucan synthase component family protein, expressed [Oryza sativa Japonica Group]	47.75	2403	37.59	1.67995e-109
	c142757_g1	gi|239948900|gb|ACS36248.1| glucan synthase-like 2, partial [Hordeum vulgare]	99.07	4956	36.86	4.96374e-180
	c143862_g1	gi|731366792|ref|XP_010695260.1| PREDICTED: alpha-1,4-glucan-protein synthase [UDP-forming] 2 [Beta vulgaris subsp. vulgaris] gi|870844990|gb|KMS97832.1| hypothetical protein BVRB_5g123920 [Beta vulgaris subsp. vulgaris]	47.77	510	60.45	9.96181e-71
	c178078_g1	gi|670373576|ref|XP_008668126.1| PREDICTED: alpha-1,4-glucan-protein synthase isoform X1 [Zea mays] gi|670373578|ref|XP_008668127.1| PREDICTED: alpha-1,4-glucan-protein synthase isoform X1 [Zea mays] gi|194705168|gb|ACF86668.1| unknown [Zea mays] gi|223947713|gb|ACN27940.1| unknown [Zea mays] gi|224029933|gb|ACN34042.1| unknown [Zea mays] gi|414584987|tpg|DAA35558.1| TPA: alpha-1,4-glucan-protein…	93.41	990	46.2	3.32912e-70
	c189077_g1	gi|1002230819|ref|XP_015650712.1| PREDICTED: callose synthase 12 [Oryza sativa Japonica Group] gi|1002230821|ref|XP_015650719.1| PREDICTED: callose synthase 12 [Oryza sativa Japonica Group] gi|18461174|dbj|BAB84371.1| 1,3-beta-glucan synthase component-like [Oryza sativa Japonica Group] gi|21644609|dbj|BAC01168.1| 1,3-beta-glucan synthase component-like [Oryza sativa Japonica Group]	61.22	3423	37.09	0
	c214997_g1	gi|670373580|ref|XP_008668128.1| PREDICTED: alpha-1,4-glucan-protein synthase isoform X2 [Zea mays]	70.49	942	51.27	1.78377e-65
	c245310_g1	gi|901794554|gb|KMZ57734.1| 1,3-beta-glucan synthase [Zostera marina]	31.34	189	58.73	4.64868e-15
	c250321_g1	gi|976901290|gb|KVH89360.1| 1,3-beta-glucan synthase subunit FKS1-like, domain-1 [Cynara cardunculus var. scolymus]	20.79	267	67.78	4.01179e-34
	c259738_g1	gi|21070389|gb|AAM34285.1| beta-1,3 glucan synthase, partial [Cenchrus americanus]	38.19	417	93.53	4.85386e-89
	c264722_g1	gi|694317371|ref|XP_009338011.1| PREDICTED: alpha-1,4-glucan-protein synthase [UDP-forming] 2 [Pyrus x bretschneideri]	39.23	426	99.3	4.05387e-98
	c279133_g1	gi|670425084|ref|XP_008653203.1| PREDICTED: probable mixed-linked glucan synthase 8 isoform X1 [Zea mays] gi|414887051|tpg|DAA63065.1| TPA: putative cellulose synthase-like family protein [Zea mays]	7.55	201	82.35	1.02732e-17
	c291298_g1	gi|670373576|ref|XP_008668126.1| PREDICTED: alpha-1,4-glucan-protein synthase isoform X1 [Zea mays] gi|670373578|ref|XP_008668127.1| PREDICTED: alpha-1,4-glucan-protein synthase isoform X1 [Zea mays] gi|194705168|gb|ACF86668.1| unknown [Zea mays] gi|223947713|gb|ACN27940.1| unknown [Zea mays] gi|224029933|gb|ACN34042.1| unknown [Zea mays] gi|414584987|tpg|DAA35558.1| TPA: alpha-1,4-glucan-protein…	13.47	141	95.74	1.3632e-31
	c319148_g1	gi|670367123|ref|XP_008664938.1| PREDICTED: probable mixed-linked glucan synthase 7 [Zea mays] gi|414871343|tpg|DAA49900.1| TPA: putative cellulose synthase-like family protein [Zea mays]	7.99	201	86.57	7.19677e-36
	c335655_g1	gi|239948900|gb|ACS36248.1| glucan synthase-like 2, partial [Hordeum vulgare]	2.35	114	86.84	1.96683e-27
	c343402_g1	gi|474299521|gb|EMS61564.1| putative mixed-linked glucan synthase 8 [Triticum urartu]	6.67	165	67.27	4.2501e-09
	c361431_g1	gi|34582500|sp|Q9SC19.2|UPTG1_SOLTU RecName: Full=Alpha-1,4-glucan-protein synthase [UDP-forming] 1; AltName: Full=Reversibly glycosylated polypeptide 1; Short=RGP1; AltName: Full=UDP-glucose:protein transglucosylase 1; Short=UPTG 1 gi|13620213|emb|CAB64206.2| UDP-glucose:protein transglucosylase [Solanum tuberosum]	19.73	216	97.22	1.06089e-44
	c361437_g1	gi|475618083|gb|EMT30339.1| Alpha-1,4-glucan-protein synthase (UDP-forming) [Aegilops tauschii]	10.05	111	100	7.4295e-16
	c361439_g1	gi|229891797|sp|P85413.1|UPTG_PHODC RecName: Full=Alpha-1,4-glucan-protein synthase [UDP-forming]; AltName: Full=Reversibly glycosylated polypeptide; Short=RGP; AltName: Full=UDP-glucose:protein transglucosylase; Short=UPTG, partial [Phoenix dactylifera]	43.33	78	96.15	8.40544e-10
	c361441_g1	gi|226493432|ref|NP_001148994.1| uncharacterized protein LOC100282614 [Zea mays] gi|195623832|gb|ACG33746.1| alpha-1,4-glucan-protein synthase 1 [Zea mays]	76.73	831	99.28	0
	c370496_g1	gi|514734672|ref|XP_004957969.1| PREDICTED: mixed-linked glucan synthase 4-like [Setaria italica] gi|944261932|gb|KQL26189.1| hypothetical protein SETIT_028885mg [Setaria italica]	40.36	1092	63.46	3.60406e-145
	c370497_g1	gi|514734672|ref|XP_004957969.1| PREDICTED: mixed-linked glucan synthase 4-like [Setaria italica] gi|944261932|gb|KQL26189.1| hypothetical protein SETIT_028885mg [Setaria italica]	35.03	948	64.56	4.19891e-136
	c370498_g1	gi|1002282331|ref|XP_015645457.1| PREDICTED: probable mixed-linked glucan synthase 3 [Oryza sativa Japonica Group] gi|75135501|sp|Q6ZF85.1|CSLF3_ORYSJ RecName: Full=Probable mixed-linked glucan synthase 3; AltName: Full=1,3;1,4-beta-D-glucan synthase 3; AltName: Full=Cellulose synthase-like protein F3; AltName: Full=OsCslF3 gi|16519233|gb|AAL25133.1|AF432504_1 cellulose synthase-like protein OsCs…	41.47	1119	68.9	1.03498e-178
	c377881_g1	gi|261876235|emb|CAZ15551.1| 1,3-beta-glucan synthase [Malus domestica]	16.58	195	100	8.53865e-38
	c378883_g1	gi|226507394|ref|NP_001147926.1| CSLF3 - cellulose synthase-like family F; beta1,3;1,4 glucan synthase [Zea mays] gi|195614638|gb|ACG29149.1| CSLF3 - cellulose synthase-like family F; beta1,3;1,4 glucan synthase [Zea mays] gi|238009780|gb|ACR35925.1| unknown [Zea mays] gi|414887056|tpg|DAA63070.1| TPA: putative cellulose synthase-like family protein [Zea mays]	9.45	243	100	4.23453e-49
	c381551_g1	gi|261876241|emb|CAZ15554.1| 1,3-beta-glucan synthase [Malus domestica]	33.77	231	98.7	1.15433e-32

## Sheet: Pectin related genes
Additional file 2: Identification of the cell wall related genes and their representitive transcripts
Cell wall related gene family	Transcript ID	NR annotation	Query coverage (%)	Align Length	Identity	E-value
Pectin acetylesterase (PAE)	c19782_g1	gi|514785545|ref|XP_004970865.1| PREDICTED: pectin acetylesterase 5-like isoform X2 [Setaria italica]	59.64	705	46.53	1.00646e-65
	c22575_g1	gi|1002280746|ref|XP_015644672.1| PREDICTED: pectin acetylesterase 12 [Oryza sativa Japonica Group] gi|50508134|dbj|BAD30604.1| putative pectinacetylesterase precursor [Oryza sativa Japonica Group] gi|50508333|dbj|BAD30184.1| putative pectinacetylesterase precursor [Oryza sativa Japonica Group] gi|113611918|dbj|BAF22296.1| Os07g0634600 [Oryza sativa Japonica Group] gi|125559288|gb|EAZ04824.1| hyp…	96.11	1401	40.88	1.65812e-69
	c82219_g1	gi|190688728|gb|ACE86391.1| pectinacetylesterase family protein [Sorghum bicolor]	65.52	915	37.13	1.96352e-24
	c241113_g1	gi|721641240|ref|XP_003566691.2| PREDICTED: pectin acetylesterase 5-like isoform X1 [Brachypodium distachyon] gi|944072498|gb|KQK07982.1| hypothetical protein BRADI_2g38780 [Brachypodium distachyon]	6.45	90	90	2.25301e-19
	c277931_g1	gi|514743966|ref|XP_004960515.1| PREDICTED: pectin acetylesterase 5-like [Setaria italica] gi|944249109|gb|KQL13372.1| hypothetical protein SETIT_022068mg [Setaria italica]	14.06	210	51.43	8.82083e-12
	c277933_g1	gi|514743966|ref|XP_004960515.1| PREDICTED: pectin acetylesterase 5-like [Setaria italica] gi|944249109|gb|KQL13372.1| hypothetical protein SETIT_022068mg [Setaria italica]	13.83	207	50.72	8.40446e-11
	c328053_g1	gi|1035948355|gb|OAY72174.1| Pectin acetylesterase 5 [Ananas comosus]	6.2	159	70.37	1.06923e-24
	c340116_g1	gi|514777158|ref|XP_004968648.1| PREDICTED: pectin acetylesterase 3 [Setaria italica] gi|944240677|gb|KQL04985.1| hypothetical protein SETIT_001489mg [Setaria italica]	8.9	117	84.62	5.02928e-25
Pectinesterase (PE)	c31187_g1	gi|670426262|ref|XP_008653773.1| PREDICTED: LOW QUALITY PROTEIN: probable pectinesterase 15, partial [Zea mays]	82.61	1143	36.88	5.16743e-17
	c92760_g1	gi|672178865|ref|XP_008809580.1| PREDICTED: pectinesterase 31-like [Phoenix dactylifera]	18.75	171	84.21	5.90774e-59
	c117269_g1	gi|960469205|ref|XP_003564769.2| PREDICTED: probable pectinesterase/pectinesterase inhibitor 51 [Brachypodium distachyon]	20.29	387	82.95	4.14555e-135
	c239150_g1	gi|960469205|ref|XP_003564769.2| PREDICTED: probable pectinesterase/pectinesterase inhibitor 51 [Brachypodium distachyon]	38.79	720	56.25	2.36064e-80
	c244695_g1	gi|473742214|gb|EMS45437.1| Pectinesterase [Triticum urartu]	23.15	216	95.83	1.53809e-42
	c245630_g1	gi|670437099|ref|XP_008659177.1| PREDICTED: pectinesterase [Zea mays] gi|413952841|gb|AFW85490.1| hypothetical protein ZEAMMB73_892342 [Zea mays]	14.69	273	76.92	2.24904e-22
	c260973_g1	gi|212721982|ref|NP_001132793.1| pectinesterase [Zea mays] gi|194695410|gb|ACF81789.1| unknown [Zea mays] gi|414885591|tpg|DAA61605.1| TPA: pectinesterase [Zea mays]	6.58	123	97.56	4.83772e-17
	c272611_g1	gi|923756553|ref|XP_013675925.1| PREDICTED: pectinesterase/pectinesterase inhibitor 3-like [Brassica napus]	28.13	330	90.91	8.10265e-67
	c284462_g1	gi|670418318|ref|XP_008649911.1| PREDICTED: probable pectinesterase 53 [Zea mays] gi|413946174|gb|AFW78823.1| hypothetical protein ZEAMMB73_511959 [Zea mays]	17.8	219	94.52	3.10936e-46
	c288132_g1	gi|670430977|ref|XP_008656171.1| PREDICTED: pectinesterase-like [Zea mays] gi|413948850|gb|AFW81499.1| hypothetical protein ZEAMMB73_478263 [Zea mays]	13.94	240	96.25	5.70093e-46
	c296564_g1	gi|670388556|ref|XP_008674738.1| PREDICTED: probable pectinesterase/pectinesterase inhibitor 51 [Zea mays] gi|414879406|tpg|DAA56537.1| TPA: pectinesterase [Zea mays]	5.97	99	100	5.73205e-10
	c320502_g1	gi|514737281|ref|XP_004958780.1| PREDICTED: probable pectinesterase/pectinesterase inhibitor 21 [Setaria italica] gi|944263020|gb|KQL27277.1| hypothetical protein SETIT_032614mg [Setaria italica]	31.33	531	97.74	1.53805e-124
	c325173_g1	gi|670441845|ref|XP_008661243.1| PREDICTED: pectinesterase 31-like [Zea mays]	11.85	117	87.18	7.46608e-15
	c325175_g1	gi|514821759|ref|XP_004985556.1| PREDICTED: pectinesterase 31-like [Setaria italica] gi|944227981|gb|KQK92385.1| hypothetical protein SETIT_039580mg [Setaria italica]	44.82	441	82.99	2.66922e-143
	c325177_g1	gi|514821759|ref|XP_004985556.1| PREDICTED: pectinesterase 31-like [Setaria italica] gi|944227981|gb|KQK92385.1| hypothetical protein SETIT_039580mg [Setaria italica]	35.06	345	83.48	1.40992e-66
	c325178_g1	gi|514821759|ref|XP_004985556.1| PREDICTED: pectinesterase 31-like [Setaria italica] gi|944227981|gb|KQK92385.1| hypothetical protein SETIT_039580mg [Setaria italica]	14.33	141	72.34	2.39105e-12
	c325182_g1	gi|514821759|ref|XP_004985556.1| PREDICTED: pectinesterase 31-like [Setaria italica] gi|944227981|gb|KQK92385.1| hypothetical protein SETIT_039580mg [Setaria italica]	89.94	915	76.22	1.2863e-165
	c378195_g1	gi|657977620|ref|XP_008380734.1| PREDICTED: pectinesterase 3 [Malus domestica]	14.02	246	89.02	2.92699e-42
	c380444_g1	gi|970028540|ref|XP_015075590.1| PREDICTED: probable pectinesterase/pectinesterase inhibitor 12 [Solanum pennellii]	18.96	327	83.49	5.49746e-60
	c383970_g1	gi|694364791|ref|XP_009361395.1| PREDICTED: probable pectinesterase/pectinesterase inhibitor 51 [Pyrus x bretschneideri]	9.56	162	100	1.3562e-28
	c390053_g1	gi|727652938|ref|XP_010497220.1| PREDICTED: probable pectinesterase/pectinesterase inhibitor 36, partial [Camelina sativa]	28.72	255	87.06	4.01613e-48
	c399579_g1	gi|734406718|gb|KHN34065.1| Putative pectinesterase/pectinesterase inhibitor 51 [Glycine soja]	35.68	258	80.23	3.63546e-47
	c400035_g1	gi|658026113|ref|XP_008348472.1| PREDICTED: pectinesterase-like [Malus domestica]	4.44	75	73.08	2.27581e-07
	c403544_g1	gi|255550287|ref|XP_002516194.1| PREDICTED: pectinesterase 3 [Ricinus communis] gi|223544680|gb|EEF46196.1| Pectinesterase-1 precursor, putative [Ricinus communis]	12.35	216	70.27	3.82781e-28
	c404227_g1	gi|1012215604|ref|XP_015934355.1| PREDICTED: probable pectinesterase/pectinesterase inhibitor 61 isoform X2 [Arachis duranensis]	42.59	336	89.29	1.47292e-72
	c406366_g1	gi|743910250|ref|XP_011048630.1| PREDICTED: pectinesterase-like [Populus euphratica]	6.04	105	88.57	3.17721e-12
Pectate lyase	c80391_g1	gi|226497420|ref|NP_001149991.1| uncharacterized protein LOC100283618 [Zea mays] gi|195635907|gb|ACG37422.1| pectate lyase 4 precursor [Zea mays]	47.8	522	95.4	4.19852e-176
	c242328_g1	gi|694358282|ref|XP_009359518.1| PREDICTED: probable pectate lyase 18 [Pyrus x bretschneideri]	7.79	96	100	1.3254e-13
	c290075_g1	gi|670359917|ref|XP_008675025.1| PREDICTED: pectate lyase 12 isoform X1 [Zea mays]	46.98	609	87.68	8.87032e-110
	c362247_g1	gi|1002854025|ref|XP_015692283.1| PREDICTED: probable pectate lyase 8 [Oryza brachyantha] gi|612339776|gb|AHW98490.1| pectate lyase precursor [Oryza brachyantha]	11.21	156	100	3.1948e-32
	c380917_g1	gi|357140570|ref|XP_003571838.1| PREDICTED: probable pectate lyase 5 [Brachypodium distachyon] gi|960476437|ref|XP_014756101.1| PREDICTED: probable pectate lyase 5 [Brachypodium distachyon] gi|960476439|ref|XP_014756102.1| PREDICTED: probable pectate lyase 5 [Brachypodium distachyon] gi|960476441|ref|XP_014756103.1| PREDICTED: probable pectate lyase 5 [Brachypodium distachyon] gi|960476443|ref|XP…	8.14	129	83.72	6.5625e-14
	c384685_g1	gi|514766515|ref|XP_004966014.1| PREDICTED: pectate lyase-like [Setaria italica]	13.99	204	85.29	2.01534e-33
	c389442_g1	gi|694361356|ref|XP_009360393.1| PREDICTED: probable pectate lyase 3 [Pyrus x bretschneideri]	21.02	285	100	9.01763e-61
	c404610_g1	gi|694361356|ref|XP_009360393.1| PREDICTED: probable pectate lyase 3 [Pyrus x bretschneideri]	10.62	144	95.83	3.04377e-06
Polygalacturonase (PGases)	c10970_g1	gi|226501180|ref|NP_001148771.1| polygalacturonase precursor [Zea mays] gi|195622048|gb|ACG32854.1| polygalacturonase precursor [Zea mays]	21.07	345	91.3	2.88576e-57
	c12290_g1	gi|1002849366|ref|XP_015690904.1| PREDICTED: probable polygalacturonase isoform X4 [Oryza brachyantha]	22.83	324	81.48	0
	c15016_g1	gi|357158595|ref|XP_003578178.1| PREDICTED: probable polygalacturonase isoform X1 [Brachypodium distachyon] gi|944054757|gb|KQJ90395.1| hypothetical protein BRADI_4g31250 [Brachypodium distachyon]	16.73	270	76.67	6.3734e-79
	c19850_g1	gi|1035945828|gb|OAY70358.1| putative polygalacturonase, partial [Ananas comosus]	79.92	1197	36.36	1.41143e-28
	c36801_g1	gi|530278699|gb|AGT16643.1| polygalacturonase [Saccharum hybrid cultivar R570]	61.88	711	63.86	1.24111e-149
	c72930_g1	gi|1012346629|gb|KYP57821.1| putative polygalacturonase [Cajanus cajan]	49.15	690	67.67	7.02588e-163
	c82843_g1	gi|460400093|ref|XP_004245570.1| PREDICTED: probable polygalacturonase [Solanum lycopersicum]	36.23	525	54.86	1.9067e-110
	c84657_g1	gi|573923034|ref|XP_006649098.1| PREDICTED: probable polygalacturonase [Oryza brachyantha]	84.17	1260	64.2	5.48486e-177
	c89687_g1	gi|514726065|ref|XP_004955888.1| PREDICTED: probable polygalacturonase [Setaria italica] gi|514726069|ref|XP_004955889.1| PREDICTED: probable polygalacturonase [Setaria italica] gi|944258885|gb|KQL23142.1| hypothetical protein SETIT_032032mg [Setaria italica]	88.12	1440	62.89	6.62984e-170
	c91787_g1	gi|1012346629|gb|KYP57821.1| putative polygalacturonase [Cajanus cajan]	51.48	723	67.49	7.10971e-157
	c106945_g1	gi|670424051|ref|XP_008652768.1| PREDICTED: probable polygalacturonase [Zea mays] gi|414885630|tpg|DAA61644.1| TPA: hypothetical protein ZEAMMB73_326074 [Zea mays]	79.26	1233	92.21	0
	c107212_g1	gi|357111082|ref|XP_003557344.1| PREDICTED: probable polygalacturonase [Brachypodium distachyon] gi|721619237|ref|XP_010228201.1| PREDICTED: probable polygalacturonase [Brachypodium distachyon] gi|944084912|gb|KQK20264.1| hypothetical protein BRADI_1g53430 [Brachypodium distachyon] gi|944084913|gb|KQK20265.1| hypothetical protein BRADI_1g53430 [Brachypodium distachyon]	24.01	351	61.02	3.55651e-44
	c126255_g1	gi|1002292583|ref|XP_015650647.1| PREDICTED: probable polygalacturonase [Oryza sativa Japonica Group] gi|42408232|dbj|BAD09389.1| putative exo-poly-alpha-D-galacturonosidase precursor [Oryza sativa Japonica Group] gi|113622765|dbj|BAF22710.1| Os08g0107300 [Oryza sativa Japonica Group] gi|937928546|dbj|BAT03462.1| Os08g0107300 [Oryza sativa Japonica Group]	59.96	921	36.68	7.08691e-26
	c131371_g1	gi|568841510|ref|XP_006474701.1| PREDICTED: probable polygalacturonase [Citrus sinensis]	58.99	966	29.79	7.27123e-30
	c148848_g1	gi|530278699|gb|AGT16643.1| polygalacturonase [Saccharum hybrid cultivar R570]	15.67	279	52.69	2.73861e-43
	c154935_g1	gi|514726065|ref|XP_004955888.1| PREDICTED: probable polygalacturonase [Setaria italica] gi|514726069|ref|XP_004955889.1| PREDICTED: probable polygalacturonase [Setaria italica] gi|944258885|gb|KQL23142.1| hypothetical protein SETIT_032032mg [Setaria italica]	42.71	555	57.49	9.39285e-105
	c185539_g1	gi|514791866|ref|XP_004972433.1| PREDICTED: probable polygalacturonase [Setaria italica] gi|944235861|gb|KQL00199.1| hypothetical protein SETIT_013629mg [Setaria italica]	28.34	426	71.13	8.41142e-114
	c196769_g1	gi|530278699|gb|AGT16643.1| polygalacturonase [Saccharum hybrid cultivar R570]	43.86	507	84.02	1.04052e-158
	c228010_g1	gi|670424051|ref|XP_008652768.1| PREDICTED: probable polygalacturonase [Zea mays] gi|414885630|tpg|DAA61644.1| TPA: hypothetical protein ZEAMMB73_326074 [Zea mays]	34.69	537	93.3	3.48427e-117
	c246528_g1	gi|514718983|ref|XP_004954128.1| PREDICTED: probable polygalacturonase [Setaria italica] gi|944267544|gb|KQL31784.1| hypothetical protein SETIT_016984mg [Setaria italica]	11.18	168	89.29	3.11472e-25
	c274163_g1	gi|670430067|ref|XP_008655818.1| PREDICTED: polygalacturonase At1g48100-like [Zea mays] gi|413947914|gb|AFW80563.1| hypothetical protein ZEAMMB73_033652 [Zea mays]	15.59	231	89.61	3.00251e-34
	c275275_g1	gi|694332739|ref|XP_009356992.1| PREDICTED: polygalacturonase inhibitor-like [Pyrus x bretschneideri]	21.82	216	100	1.05449e-43
	c277515_g1	gi|514731406|ref|XP_004957175.1| PREDICTED: probable polygalacturonase [Setaria italica] gi|944260783|gb|KQL25040.1| hypothetical protein SETIT_029777mg [Setaria italica]	11.93	165	96.36	4.93052e-26
	c283771_g1	gi|226491044|ref|NP_001147231.1| polygalacturonase inhibitor precursor [Zea mays] gi|195608848|gb|ACG26254.1| polygalacturonase inhibitor precursor [Zea mays]	32.55	333	88.29	1.05004e-47
	c291095_g1	gi|514746470|ref|XP_004961120.1| PREDICTED: polygalacturonase At1g48100-like [Setaria italica] gi|944249914|gb|KQL14177.1| hypothetical protein SETIT_021744mg [Setaria italica]	8.16	144	75	2.95938e-10
	c298671_g1	gi|670407469|ref|XP_008645203.1| PREDICTED: probable polygalacturonase At1g80170 [Zea mays] gi|413935441|gb|AFW69992.1| hypothetical protein ZEAMMB73_828266 [Zea mays]	14.15	288	62.5	2.37962e-25
	c298673_g1	gi|670407469|ref|XP_008645203.1| PREDICTED: probable polygalacturonase At1g80170 [Zea mays] gi|413935441|gb|AFW69992.1| hypothetical protein ZEAMMB73_828266 [Zea mays]	21.12	387	65.15	1.06723e-40
	c320090_g1	gi|226505864|ref|NP_001146063.1| uncharacterized protein LOC100279594 precursor [Zea mays] gi|219885527|gb|ACL53138.1| unknown [Zea mays] gi|224029183|gb|ACN33667.1| unknown [Zea mays] gi|413922151|gb|AFW62083.1| polygalacturonase-1 non-catalytic beta subunit [Zea mays] gi|1008911284|gb|AMR36678.1| BURP5 [Zea mays]	20.06	390	90	9.04209e-59
	c341348_g1	gi|255546503|ref|XP_002514311.1| PREDICTED: BURP domain-containing protein 3 [Ricinus communis] gi|223546767|gb|EEF48265.1| polygalacturonase, putative [Ricinus communis]	91.67	1002	41.12	1.47993e-72
	c343320_g1	gi|357131906|ref|XP_003567574.1| PREDICTED: polygalacturonase At1g48100 [Brachypodium distachyon] gi|944068575|gb|KQK04059.1| hypothetical protein BRADI_2g11380 [Brachypodium distachyon]	18.64	267	66.32	6.37066e-39
	c343321_g1	gi|357131906|ref|XP_003567574.1| PREDICTED: polygalacturonase At1g48100 [Brachypodium distachyon] gi|944068575|gb|KQK04059.1| hypothetical protein BRADI_2g11380 [Brachypodium distachyon]	12.63	180	61.9	1.8815e-30
	c355154_g1	gi|670443101|ref|XP_008661941.1| PREDICTED: polygalacturonase isoform X1 [Zea mays]	23.16	315	90.48	4.74084e-51
	c355156_g1	gi|413916538|gb|AFW56470.1| polygalacturonase [Zea mays]	74.24	1020	92.35	0
	c355157_g1	gi|670443101|ref|XP_008661941.1| PREDICTED: polygalacturonase isoform X1 [Zea mays]	9.13	123	97.56	8.67928e-19
	c355159_g1	gi|413916538|gb|AFW56470.1| polygalacturonase [Zea mays]	27.29	375	94.4	2.9203e-78
	c386008_g1	gi|514707397|ref|XP_004951285.1| PREDICTED: probable polygalacturonase [Setaria italica] gi|944263608|gb|KQL27848.1| hypothetical protein SETIT_017201mg [Setaria italica]	7.38	99	96.97	7.14848e-14
	c394491_g1	gi|225426168|ref|XP_002278930.1| PREDICTED: probable polygalacturonase [Vitis vinifera]	13.54	195	81.54	2.28745e-29
	c400114_g1	gi|694439450|ref|XP_009346610.1| PREDICTED: probable polygalacturonase isoform X2 [Pyrus x bretschneideri]	16.08	219	100	1.41722e-43
Rhamnogalacturonate (RG)	c284740_g1	gi|670395523|ref|XP_008678148.1| PREDICTED: probable rhamnogalacturonate lyase B isoform X2 [Zea mays]	10.83	234	97.44	1.46135e-46
	c387256_g1	gi|769797399|ref|XP_011627902.1| PREDICTED: probable rhamnogalacturonate lyase B [Amborella trichopoda]	5.6	108	97.22	1.35928e-15

## Sheet: Cell wall loosening genes
Additional file 2: Identification of the cell wall related genes and their representitive transcripts
Cell wall related gene family	Transcript ID	NR annotation	Query coverage (%)	Align Length	Identity	E-value
Expansin (EXP)	c108459_g1	gi|806638589|ref|NP_001292795.1| expansin-B3 precursor [Zea mays] gi|413955242|gb|AFW87891.1| beta-expansin 5 [Zea mays]	100	804	94.4	2.06984e-172
	c170233_g1	gi|955724236|ref|XP_012698216.2| PREDICTED: expansin-like A2, partial [Setaria italica]	16.5	201	62.32	2.68616e-18
	c245773_g1	gi|960456285|ref|XP_003563074.2| PREDICTED: expansin-like B1 [Brachypodium distachyon]	6.09	63	85.71	1.17946e-09
	c252589_g1	gi|566201210|ref|XP_002319359.2| Beta-expansin 1 precursor family protein [Populus trichocarpa] gi|550325796|gb|EEE95282.2| Beta-expansin 1 precursor family protein [Populus trichocarpa]	12.6	99	87.88	1.76347e-10
	c254748_g1	gi|694398405|ref|XP_009374380.1| PREDICTED: expansin-A4-like [Pyrus x bretschneideri]	30.31	231	100	3.54698e-35
	c264626_g1	gi|14193757|gb|AAK56122.1|AF332172_1 alpha-expansin 4, partial [Zea mays]	49.75	294	97.96	7.02128e-64
	c268598_g1	gi|29467507|dbj|BAC67192.1| expansin [Pyrus communis]	69.96	531	100	4.23326e-104
	c287081_g1	gi|694428352|ref|XP_009341751.1| PREDICTED: expansin-A4-like [Pyrus x bretschneideri]	25.19	195	100	2.72174e-37
	c290583_g1	gi|694362105|ref|XP_009360611.1| PREDICTED: expansin-A15 [Pyrus x bretschneideri]	54.36	393	100	6.71792e-77
	c320244_g1	gi|37951215|dbj|BAD00016.1| expansin [Malus domestica]	41.59	267	100	5.83945e-55
	c349763_g1	gi|955724236|ref|XP_012698216.2| PREDICTED: expansin-like A2, partial [Setaria italica]	74.25	879	63.64	1.39229e-86
	c349764_g1	gi|955724236|ref|XP_012698216.2| PREDICTED: expansin-like A2, partial [Setaria italica]	94.5	1122	71.97	1.38584e-153
	c349766_g1	gi|955724236|ref|XP_012698216.2| PREDICTED: expansin-like A2, partial [Setaria italica]	42.25	552	69.02	7.61785e-54
	c349768_g1	gi|955724236|ref|XP_012698216.2| PREDICTED: expansin-like A2, partial [Setaria italica]	56	654	59.26	2.11282e-59
	c351722_g1	gi|695271543|ref|NP_001289231.1| expansin precursor [Pyrus x bretschneideri] gi|694373231|ref|XP_009363799.1| PREDICTED: expansin-A8 [Pyrus x bretschneideri] gi|29467499|dbj|BAC67188.1| expansin [Pyrus communis] gi|525327280|gb|AGR44454.1| expansin 1 [Pyrus x bretschneideri]	82.28	627	99.52	5.65823e-151
	c351726_g1	gi|29467501|dbj|BAC67189.1| expansin [Pyrus communis]	100	759	99.6	2.34744e-160
	c353351_g1	gi|1002843742|ref|XP_015689279.1| PREDICTED: LOW QUALITY PROTEIN: expansin-A5-like, partial [Oryza brachyantha]	26.48	174	93.1	2.05865e-18
	c353353_g1	gi|670414115|ref|XP_008648280.1| PREDICTED: alpha-expansin 5 isoform X1 [Zea mays] gi|413945734|gb|AFW78383.1| hypothetical protein ZEAMMB73_019156 [Zea mays]	29.8	219	100	2.9852e-41
	c353357_g1	gi|670414115|ref|XP_008648280.1| PREDICTED: alpha-expansin 5 isoform X1 [Zea mays] gi|413945734|gb|AFW78383.1| hypothetical protein ZEAMMB73_019156 [Zea mays]	29.8	219	100	4.08193e-41
	c358916_g1	gi|514817945|ref|XP_004983685.1| PREDICTED: expansin-B4 [Setaria italica] gi|944225559|gb|KQK89963.1| hypothetical protein SETIT_036899mg [Setaria italica]	15.68	135	80	3.03017e-16
	c358920_g1	gi|1002303233|ref|XP_015614992.1| PREDICTED: expansin-B4 [Oryza sativa Japonica Group] gi|75166688|sp|Q94LR4.1|EXPB4_ORYSJ RecName: Full=Expansin-B4; AltName: Full=Beta-expansin-4; AltName: Full=OsEXPB4; AltName: Full=OsaEXPb1.7; Flags: Precursor gi|14165334|gb|AAK55466.1|AC069300_21 beta-expansin (EXPB4) [Oryza sativa Japonica Group] gi|31433457|gb|AAP54970.1| Beta-expansin 1a precursor, putativ…	49.3	423	95.74	4.673e-95
	c358921_g1	gi|1002303233|ref|XP_015614992.1| PREDICTED: expansin-B4 [Oryza sativa Japonica Group] gi|75166688|sp|Q94LR4.1|EXPB4_ORYSJ RecName: Full=Expansin-B4; AltName: Full=Beta-expansin-4; AltName: Full=OsEXPB4; AltName: Full=OsaEXPb1.7; Flags: Precursor gi|14165334|gb|AAK55466.1|AC069300_21 beta-expansin (EXPB4) [Oryza sativa Japonica Group] gi|31433457|gb|AAP54970.1| Beta-expansin 1a precursor, putativ…	49.3	423	95.74	1.66347e-94
	c358922_g1	gi|1002303233|ref|XP_015614992.1| PREDICTED: expansin-B4 [Oryza sativa Japonica Group] gi|75166688|sp|Q94LR4.1|EXPB4_ORYSJ RecName: Full=Expansin-B4; AltName: Full=Beta-expansin-4; AltName: Full=OsEXPB4; AltName: Full=OsaEXPb1.7; Flags: Precursor gi|14165334|gb|AAK55466.1|AC069300_21 beta-expansin (EXPB4) [Oryza sativa Japonica Group] gi|31433457|gb|AAP54970.1| Beta-expansin 1a precursor, putativ…	49.3	423	95.74	1.17402e-94
	c361618_g1	gi|514726975|ref|XP_004956111.1| PREDICTED: expansin-B11-like [Setaria italica] gi|944259209|gb|KQL23466.1| hypothetical protein SETIT_030574mg [Setaria italica]	41.96	384	75.74	1.39089e-41
	c361619_g1	gi|162463154|ref|NP_001105043.1| beta-expansin 4 precursor [Zea mays] gi|14193767|gb|AAK56127.1|AF332177_1 beta-expansin 4 [Zea mays] gi|194703884|gb|ACF86026.1| unknown [Zea mays] gi|195629586|gb|ACG36434.1| beta-expansin 4 precursor [Zea mays] gi|414884450|tpg|DAA60464.1| TPA: beta-expansin 4 Precursor [Zea mays]	9.42	87	93.1	1.41088e-09
	c361620_g1	gi|514726975|ref|XP_004956111.1| PREDICTED: expansin-B11-like [Setaria italica] gi|944259209|gb|KQL23466.1| hypothetical protein SETIT_030574mg [Setaria italica]	41.96	405	80.88	7.75624e-50
	c361627_g1	gi|226531576|ref|NP_001148284.1| beta-expansin 4 precursor [Zea mays] gi|195617134|gb|ACG30397.1| beta-expansin 4 precursor [Zea mays]	19.05	168	94.64	1.79655e-30
	c361633_g1	gi|514715896|ref|XP_004953362.1| PREDICTED: expansin-B11-like [Setaria italica] gi|944266567|gb|KQL30807.1| hypothetical protein SETIT_017969mg [Setaria italica]	21.92	192	90.62	1.38777e-30
	c361634_g1	gi|514715896|ref|XP_004953362.1| PREDICTED: expansin-B11-like [Setaria italica] gi|944266567|gb|KQL30807.1| hypothetical protein SETIT_017969mg [Setaria italica]	22.26	195	87.69	2.79513e-29
	c397275_g1	gi|694427179|ref|XP_009341228.1| PREDICTED: expansin-like B1 [Pyrus x bretschneideri]	15.38	108	77.78	2.88983e-20
	c406959_g1	gi|37951207|dbj|BAD00012.1| expansin [Malus domestica]	29.41	195	96.92	1.08803e-35

## Sheet: Other cell wall related genes
Additional file 4: Identification of the cell wall related genes and their representitive transcripts.
Cell wall related gene family	Transcript ID	NR annotation	Query coverage (%)	Align Length	Identity	E-value
Other GTs	c2700_g1	gi|162458945|ref|NP_001105810.1| glycosyltransferase [Zea mays] gi|63087740|emb|CAI93185.1| glycosyltransferase [Zea mays]	50	630	55.92	1.4233e-46
	c6219_g1	gi|226532070|ref|NP_001147864.1| glycosyltransferase [Zea mays] gi|195614204|gb|ACG28932.1| glycosyltransferase [Zea mays]	99.81	1557	83.02	0
	c15018_g1	gi|475622791|gb|EMT31976.1| Glycosyltransferase QUASIMODO1 [Aegilops tauschii]	62.39	1296	66.07	5.91052e-166
	c17792_g1	gi|56409860|emb|CAI30078.1| glycosyltransferase [Sorghum bicolor]	33.81	531	51.37	3.69031e-25
	c18189_g1	gi|66347206|emb|CAI96159.1| glycosyltransferase [Saccharum officinarum]	98.67	1335	45.91	5.25356e-100
	c21664_g1	gi|195619204|gb|ACG31432.1| secondary cell wall-related glycosyltransferase family 47 [Zea mays]	93.08	1170	98.97	0
	c23100_g1	gi|1024994725|gb|ANC33503.1| glycosyltransferase 43D [Miscanthus lutarioriparius]	67.41	912	97.37	0
	c23314_g1	gi|195619204|gb|ACG31432.1| secondary cell wall-related glycosyltransferase family 47 [Zea mays]	83.53	1068	54.32	2.25452e-110
	c25102_g1	gi|66347206|emb|CAI96159.1| glycosyltransferase [Saccharum officinarum]	89.56	1242	42.69	2.29832e-62
	c27079_g1	gi|670385133|ref|XP_008673420.1| PREDICTED: glycosyltransferase isoform X1 [Zea mays] gi|414879189|tpg|DAA56320.1| TPA: hypothetical protein ZEAMMB73_962821 [Zea mays]	68.44	1056	53.33	1.84842e-101
	c27639_g1	gi|162460449|ref|NP_001105165.1| glycosyltransferase [Zea mays] gi|56409864|emb|CAI30080.1| glycosyltransferase [Zea mays] gi|414879190|tpg|DAA56321.1| TPA: glycosyltransferase [Zea mays]	100	1485	95.77	0
	c30685_g1	gi|226508990|ref|NP_001150077.1| glycosyltransferase 5 [Zea mays] gi|195636500|gb|ACG37718.1| glycosyltransferase 5 [Zea mays]	75.78	1023	99.12	0
	c30785_g1	gi|162459422|ref|NP_001105783.1| glycosyltransferase [Zea mays] gi|63087722|emb|CAI93176.1| glycosyltransferase [Zea mays] gi|413946900|gb|AFW79549.1| glycosyltransferase [Zea mays]	99.7	987	48.38	1.6984e-71
	c32862_g1	gi|514817563|ref|XP_004983500.1| PREDICTED: glycosyltransferase-like At2g41451 [Setaria italica]	64.26	1035	39.04	4.36373e-40
	c34815_g1	gi|242052613|ref|XP_002455452.1| hypothetical protein SORBIDRAFT_03g011010 [Sorghum bicolor] gi|63087720|emb|CAI93175.1| glycosyltransferase [Sorghum bicolor] gi|241927427|gb|EES00572.1| hypothetical protein SORBI_003G129400 [Sorghum bicolor]	52.65	537	96.09	5.09691e-128
	c40315_g1	gi|413919186|gb|AFW59118.1| putative DUF604-domain containing/glycosyltransferase-related family protein [Zea mays]	56.92	927	47.45	1.09677e-73
	c41858_g1	gi|413915952|gb|AFW55884.1| secondary cell wall glycosyltransferase family 47 [Zea mays]	38.84	579	46.67	5.90644e-28
	c44445_g1	gi|835981031|ref|XP_004967383.2| PREDICTED: glycosyltransferase-like KOBITO 1 [Setaria italica] gi|944238922|gb|KQL03230.1| hypothetical protein SETIT_000927mg [Setaria italica]	72.01	1188	43.75	2.14752e-73
	c47885_g1	gi|1024994729|gb|ANC33504.1| glycosyltransferase 43E [Miscanthus lutarioriparius]	78.24	879	88.41	0
	c55287_g1	gi|475568717|gb|EMT15547.1| Putative glycosyltransferase [Aegilops tauschii]	64.24	981	54.49	3.43882e-100
	c61308_g1	gi|670385133|ref|XP_008673420.1| PREDICTED: glycosyltransferase isoform X1 [Zea mays] gi|414879189|tpg|DAA56320.1| TPA: hypothetical protein ZEAMMB73_962821 [Zea mays]	78.28	1152	92.49	0
	c63521_g1	gi|56409850|emb|CAI30073.1| glycosyltransferase [Saccharum officinarum]	52.36	927	54.55	1.43668e-119
	c64106_g1	gi|226495701|ref|NP_001148104.1| uncharacterized protein LOC100281712 [Zea mays] gi|195615828|gb|ACG29744.1| glycosyltransferase [Zea mays]	91.65	1248	85.85	0
	c66352_g1	gi|162459422|ref|NP_001105783.1| glycosyltransferase [Zea mays] gi|63087722|emb|CAI93176.1| glycosyltransferase [Zea mays] gi|413946900|gb|AFW79549.1| glycosyltransferase [Zea mays]	95.45	945	90.82	1.89146e-169
	c68709_g1	gi|514817563|ref|XP_004983500.1| PREDICTED: glycosyltransferase-like At2g41451 [Setaria italica]	27.93	429	93.71	0
	c72081_g1	gi|413937110|gb|AFW71661.1| putative glycosyltransferase [Zea mays]	89.33	1344	36.75	2.71738e-48
	c78918_g1	gi|933121681|ref|NP_001152262.2| transferase, transferring glycosyl groups [Zea mays] gi|670380333|ref|XP_008670912.1| PREDICTED: uncharacterized protein LOC103648203 [Zea mays] gi|238010386|gb|ACR36228.1| unknown [Zea mays] gi|414585777|tpg|DAA36348.1| TPA: putative DUF604-domain containing/glycosyltransferase-related family protein [Zea mays] gi|414591841|tpg|DAA42412.1| TPA: putative DUF604-do…	89.3	1368	95.64	0
	c79399_g1	gi|670362923|ref|XP_008654085.1| PREDICTED: uncharacterized protein LOC103634306 [Zea mays] gi|414866045|tpg|DAA44602.1| TPA: putative DUF604-domain containing/glycosyltransferase-related family protein [Zea mays]	27.68	438	61.64	2.36047e-122
	c83335_g1	gi|162459422|ref|NP_001105783.1| glycosyltransferase [Zea mays] gi|63087722|emb|CAI93176.1| glycosyltransferase [Zea mays] gi|413946900|gb|AFW79549.1| glycosyltransferase [Zea mays]	14.85	147	93.88	2.22976e-21
	c85635_g1	gi|1024994721|gb|ANC33502.1| glycosyltransferase 43C [Miscanthus lutarioriparius]	98.66	1326	98.42	0
	c88486_g1	gi|413935205|gb|AFW69756.1| glycosyltransferase [Zea mays]	13.15	216	90.41	2.49883e-60
	c96506_g1	gi|66347206|emb|CAI96159.1| glycosyltransferase [Saccharum officinarum]	83.56	1131	54.1	2.22802e-101
	c106766_g1	gi|195648072|gb|ACG43504.1| secondary cell wall-related glycosyltransferase family 47 [Zea mays]	66.19	834	98.2	0
	c116184_g1	gi|475461094|gb|EMT02042.1| Putative glycosyltransferase AGO61 [Aegilops tauschii]	40.3	636	67.29	6.65678e-156
	c120963_g1	gi|1035957704|gb|OAY79067.1| Glycosyltransferase family protein 64 protein C5 [Ananas comosus]	56.99	1347	36.36	6.36157e-65
	c122325_g1	gi|670435363|ref|XP_008658254.1| PREDICTED: uncharacterized protein LOC100273057 isoform X1 [Zea mays] gi|413953933|gb|AFW86582.1| glycosyltransferase [Zea mays]	100	1746	84.16	0
	c122451_g1	gi|162459422|ref|NP_001105783.1| glycosyltransferase [Zea mays] gi|63087722|emb|CAI93176.1| glycosyltransferase [Zea mays] gi|413946900|gb|AFW79549.1| glycosyltransferase [Zea mays]	99.7	987	88.79	1.63771e-164
	c123820_g1	gi|195611628|gb|ACG27644.1| glycosyltransferase [Zea mays]	98.3	1593	88.16	0
	c123971_g1	gi|933121681|ref|NP_001152262.2| transferase, transferring glycosyl groups [Zea mays] gi|670380333|ref|XP_008670912.1| PREDICTED: uncharacterized protein LOC103648203 [Zea mays] gi|238010386|gb|ACR36228.1| unknown [Zea mays] gi|414585777|tpg|DAA36348.1| TPA: putative DUF604-domain containing/glycosyltransferase-related family protein [Zea mays] gi|414591841|tpg|DAA42412.1| TPA: putative DUF604-do…	46.5	717	74.9	1.01075e-173
	c125155_g1	gi|670435363|ref|XP_008658254.1| PREDICTED: uncharacterized protein LOC100273057 isoform X1 [Zea mays] gi|413953933|gb|AFW86582.1| glycosyltransferase [Zea mays]	33.85	582	64.98	2.01937e-124
	c126875_g1	gi|226532070|ref|NP_001147864.1| glycosyltransferase [Zea mays] gi|195614204|gb|ACG28932.1| glycosyltransferase [Zea mays]	79.08	1269	40.83	1.37353e-41
	c127565_g1	gi|894216057|ref|NP_001297670.1| glycosyltransferase [Zea mays] gi|413934620|gb|AFW69171.1| glycosyltransferase [Zea mays]	88.28	1389	96.57	0
	c130806_g1	gi|226492922|ref|NP_001147068.1| glycosyltransferase [Zea mays] gi|224028515|gb|ACN33333.1| unknown [Zea mays] gi|413935495|gb|AFW70046.1| glycosyltransferase [Zea mays]	62.7	915	89.54	0
	c132596_g1	gi|242052299|ref|XP_002455295.1| hypothetical protein SORBIDRAFT_03g007960 [Sorghum bicolor] gi|56409858|emb|CAI30077.1| glycosyltransferase [Sorghum bicolor] gi|241927270|gb|EES00415.1| hypothetical protein SORBI_003G095200 [Sorghum bicolor]	71.15	1065	86.85	0
	c135720_g1	gi|242052299|ref|XP_002455295.1| hypothetical protein SORBIDRAFT_03g007960 [Sorghum bicolor] gi|56409858|emb|CAI30077.1| glycosyltransferase [Sorghum bicolor] gi|241927270|gb|EES00415.1| hypothetical protein SORBI_003G095200 [Sorghum bicolor]	34.7	528	91.57	6.29653e-168
	c138850_g1	gi|242052613|ref|XP_002455452.1| hypothetical protein SORBIDRAFT_03g011010 [Sorghum bicolor] gi|63087720|emb|CAI93175.1| glycosyltransferase [Sorghum bicolor] gi|241927427|gb|EES00572.1| hypothetical protein SORBI_003G129400 [Sorghum bicolor]	52.65	522	93.3	1.535e-114
	c140946_g1	gi|56409850|emb|CAI30073.1| glycosyltransferase [Saccharum officinarum]	72.95	1254	98.56	0
	c142476_g1	gi|670443306|ref|XP_008662059.1| PREDICTED: secondary cell wall-related glycosyltransferase family 47 isoform X1 [Zea mays]	80.17	1419	85.44	0
	c143155_g1	gi|56409862|emb|CAI30079.1| glycosyltransferase [Saccharum officinarum]	93.8	1413	39.88	1.29858e-53
	c150058_g1	gi|56409850|emb|CAI30073.1| glycosyltransferase [Saccharum officinarum]	83.25	1428	94.97	0
	c154022_g1	gi|195625922|gb|ACG34791.1| secondary cell wall-related glycosyltransferase family 47 [Zea mays]	80.8	1050	57.26	3.14757e-110
	c155514_g1	gi|670403868|ref|XP_008643571.1| PREDICTED: glycosyltransferase isoform X1 [Zea mays] gi|413935496|gb|AFW70047.1| hypothetical protein ZEAMMB73_657787 [Zea mays]	85.09	1140	49.1	1.68143e-64
	c159030_g1	gi|1024994733|gb|ANC33505.1| glycosyltransferase 43F [Miscanthus lutarioriparius]	83.24	894	99.33	0
	c159600_g1	gi|413937110|gb|AFW71661.1| putative glycosyltransferase [Zea mays]	57.11	828	96.38	0
	c162056_g1	gi|933121681|ref|NP_001152262.2| transferase, transferring glycosyl groups [Zea mays] gi|670380333|ref|XP_008670912.1| PREDICTED: uncharacterized protein LOC103648203 [Zea mays] gi|238010386|gb|ACR36228.1| unknown [Zea mays] gi|414585777|tpg|DAA36348.1| TPA: putative DUF604-domain containing/glycosyltransferase-related family protein [Zea mays] gi|414591841|tpg|DAA42412.1| TPA: putative DUF604-do…	35.99	555	99.46	0
	c163052_g1	gi|1002871355|ref|XP_015697490.1| PREDICTED: glycosyltransferase-like KOBITO 1 [Oryza brachyantha]	20.82	291	90.72	4.71421e-139
	c164754_g1	gi|670435363|ref|XP_008658254.1| PREDICTED: uncharacterized protein LOC100273057 isoform X1 [Zea mays] gi|413953933|gb|AFW86582.1| glycosyltransferase [Zea mays]	18.75	327	56.88	6.47111e-67
	c166691_g1	gi|226492922|ref|NP_001147068.1| glycosyltransferase [Zea mays] gi|224028515|gb|ACN33333.1| unknown [Zea mays] gi|413935495|gb|AFW70046.1| glycosyltransferase [Zea mays]	99.39	1464	88.75	0
	c167106_g1	gi|383100754|emb|CCG47984.1| glycosyltransferase, HGA-like,putative,expressed [Triticum aestivum]	34.47	660	51.36	1.1476e-107
	c169772_g1	gi|66347206|emb|CAI96159.1| glycosyltransferase [Saccharum officinarum]	57.56	777	96.53	0
	c170992_g1	gi|242052299|ref|XP_002455295.1| hypothetical protein SORBIDRAFT_03g007960 [Sorghum bicolor] gi|56409858|emb|CAI30077.1| glycosyltransferase [Sorghum bicolor] gi|241927270|gb|EES00415.1| hypothetical protein SORBI_003G095200 [Sorghum bicolor]	85.38	1305	87.1	0
	c171192_g1	gi|63087750|emb|CAI93190.1| glycosyltransferase [Saccharum officinarum]	77.02	1287	43.15	1.57788e-53
	c172149_g1	gi|226532070|ref|NP_001147864.1| glycosyltransferase [Zea mays] gi|195614204|gb|ACG28932.1| glycosyltransferase [Zea mays]	86.95	1425	45.36	1.72735e-70
	c174600_g1	gi|162460449|ref|NP_001105165.1| glycosyltransferase [Zea mays] gi|56409864|emb|CAI30080.1| glycosyltransferase [Zea mays] gi|414879190|tpg|DAA56321.1| TPA: glycosyltransferase [Zea mays]	90.85	1401	36.23	8.50545e-40
	c175560_g1	gi|162460449|ref|NP_001105165.1| glycosyltransferase [Zea mays] gi|56409864|emb|CAI30080.1| glycosyltransferase [Zea mays] gi|414879190|tpg|DAA56321.1| TPA: glycosyltransferase [Zea mays]	43.7	684	33.48	1.36785e-23
	c181209_g1	gi|1002256971|ref|XP_015632796.1| PREDICTED: probable galacturonosyltransferase 11 [Oryza sativa Japonica Group] gi|41469091|gb|AAS07065.1| putative glycosyltransferase protein [Oryza sativa Japonica Group] gi|108708794|gb|ABF96589.1| Glycosyl transferase family 8 protein, expressed [Oryza sativa Japonica Group] gi|113548831|dbj|BAF12274.1| Os03g0413400 [Oryza sativa Japonica Group] gi|218193037|…	70.98	1254	36.7	3.20043e-67
	c181876_g1	gi|242052613|ref|XP_002455452.1| hypothetical protein SORBIDRAFT_03g011010 [Sorghum bicolor] gi|63087720|emb|CAI93175.1| glycosyltransferase [Sorghum bicolor] gi|241927427|gb|EES00572.1| hypothetical protein SORBI_003G129400 [Sorghum bicolor]	75.88	741	92.25	1.2115e-167
	c184260_g1	gi|56409850|emb|CAI30073.1| glycosyltransferase [Saccharum officinarum]	69.63	1284	36.82	8.56453e-45
	c192057_g1	gi|1024994721|gb|ANC33502.1| glycosyltransferase 43C [Miscanthus lutarioriparius]	84.6	1143	75	2.2426e-180
	c192965_g1	gi|413937110|gb|AFW71661.1| putative glycosyltransferase [Zea mays]	100	1416	95.82	0
	c193079_g1	gi|226492922|ref|NP_001147068.1| glycosyltransferase [Zea mays] gi|224028515|gb|ACN33333.1| unknown [Zea mays] gi|413935495|gb|AFW70046.1| glycosyltransferase [Zea mays]	14.34	213	71.83	1.09522e-34
	c194563_g1	gi|1024994729|gb|ANC33504.1| glycosyltransferase 43E [Miscanthus lutarioriparius]	50.26	582	79.38	4.26243e-131
	c196217_g1	gi|894216057|ref|NP_001297670.1| glycosyltransferase [Zea mays] gi|413934620|gb|AFW69171.1| glycosyltransferase [Zea mays]	73.35	1164	98.2	0
	c203577_g1	gi|743755296|ref|XP_010943048.1| PREDICTED: glycosyltransferase family protein 64 protein C5-like isoform X1 [Elaeis guineensis]	45.19	1101	32.65	7.24449e-63
	c208246_g1	gi|1002257559|ref|XP_015633102.1| PREDICTED: beta-glucuronosyltransferase GlcAT14B [Oryza sativa Japonica Group] gi|108707468|gb|ABF95263.1| glycosyltransferase family 14 protein, putative, expressed [Oryza sativa Japonica Group] gi|937908602|dbj|BAS83522.1| Os03g0276900 [Oryza sativa Japonica Group]	40.8	498	79.52	3.49194e-93
	c212685_g1	gi|162459422|ref|NP_001105783.1| glycosyltransferase [Zea mays] gi|63087722|emb|CAI93176.1| glycosyltransferase [Zea mays] gi|413946900|gb|AFW79549.1| glycosyltransferase [Zea mays]	99.7	987	88.48	4.13006e-161
	c216346_g1	gi|1002278314|ref|XP_015643483.1| PREDICTED: probable beta-1,3-galactosyltransferase 9 isoform X2 [Oryza sativa Japonica Group] gi|1002278396|ref|XP_015643523.1| PREDICTED: probable beta-1,3-galactosyltransferase 9 isoform X2 [Oryza sativa Japonica Group] gi|8096321|dbj|BAA95824.1| beta 1,3-glycosyltransferase-like protein II [Oryza sativa Japonica Group] gi|8096331|dbj|BAA95834.1| beta 1,3-glyco…	55.37	585	87.31	2.39225e-146
	c219940_g1	gi|926459507|ref|NP_001149267.2| secondary cell wall-related glycosyltransferase family 47 precursor [Zea mays] gi|670373334|ref|XP_008667997.1| PREDICTED: secondary cell wall-related glycosyltransferase family 47 isoform X1 [Zea mays] gi|194700342|gb|ACF84255.1| unknown [Zea mays] gi|414587472|tpg|DAA38043.1| TPA: secondary cell wall glycosyltransferase family 47 [Zea mays]	70.49	924	57.73	2.73388e-90
	c222814_g1	gi|670435363|ref|XP_008658254.1| PREDICTED: uncharacterized protein LOC100273057 isoform X1 [Zea mays] gi|413953933|gb|AFW86582.1| glycosyltransferase [Zea mays]	67.36	1161	73.75	0
	c223862_g1	gi|1024994729|gb|ANC33504.1| glycosyltransferase 43E [Miscanthus lutarioriparius]	45.08	510	57.54	1.15381e-80
	c230037_g1	gi|226507655|ref|NP_001142280.1| glycosyltransferase [Zea mays] gi|194707986|gb|ACF88077.1| unknown [Zea mays] gi|413951273|gb|AFW83922.1| glycosyltransferase [Zea mays]	38.19	612	61.35	4.2973e-101
	c231223_g1	gi|56409850|emb|CAI30073.1| glycosyltransferase [Saccharum officinarum]	85.69	1473	59.65	1.45474e-177
	c231881_g1	gi|242052299|ref|XP_002455295.1| hypothetical protein SORBIDRAFT_03g007960 [Sorghum bicolor] gi|56409858|emb|CAI30077.1| glycosyltransferase [Sorghum bicolor] gi|241927270|gb|EES00415.1| hypothetical protein SORBI_003G095200 [Sorghum bicolor]	64.33	1053	38.83	2.07418e-26
	c234096_g1	gi|1024994729|gb|ANC33504.1| glycosyltransferase 43E [Miscanthus lutarioriparius]	56.99	678	57.38	1.19266e-60
	c237977_g1	gi|573946405|ref|XP_006655536.1| PREDICTED: glycosyltransferase family protein 64 protein C5-like [Oryza brachyantha]	51.57	1035	49.86	3.95297e-98
	c238118_g1	gi|1024994725|gb|ANC33503.1| glycosyltransferase 43D [Miscanthus lutarioriparius]	65.85	891	96.97	0
	c238203_g1	gi|1009105608|ref|XP_015881552.1| PREDICTED: probable glycosyltransferase At5g03795 isoform X1 [Ziziphus jujuba]	45.28	579	51.26	6.57021e-59
	c244412_g1	gi|357517365|ref|XP_003628971.1| glycosyltransferase family 92 protein [Medicago truncatula] gi|355522993|gb|AET03447.1| glycosyltransferase family 92 protein [Medicago truncatula]	15.94	237	71.25	1.13058e-33
	c247148_g1	gi|670440849|ref|XP_008660691.1| PREDICTED: probable glycosyltransferase At5g25310 [Zea mays]	6.3	144	72.92	4.71753e-16
	c247698_g1	gi|747102466|ref|XP_011099399.1| PREDICTED: glycosyltransferase 6-like [Sesamum indicum]	18.18	252	73.81	3.92581e-36
	c256483_g1	gi|936292831|gb|ALH21124.1| glycosyltransferase 3 [Pyrus x bretschneideri]	36.33	522	94.83	2.75341e-114
	c259863_g1	gi|1024994729|gb|ANC33504.1| glycosyltransferase 43E [Miscanthus lutarioriparius]	7.77	90	86.67	2.35022e-09
	c260757_g1	gi|514817563|ref|XP_004983500.1| PREDICTED: glycosyltransferase-like At2g41451 [Setaria italica]	9.57	147	100	5.90196e-28
	c260758_g1	gi|514817563|ref|XP_004983500.1| PREDICTED: glycosyltransferase-like At2g41451 [Setaria italica]	11.13	171	100	7.1082e-33
	c261247_g1	gi|66347206|emb|CAI96159.1| glycosyltransferase [Saccharum officinarum]	7.56	102	100	5.93179e-16
	c272783_g1	gi|195607024|gb|ACG25342.1| glycosyltransferase [Zea mays]	12.09	177	74.58	1.59477e-20
	c289496_g1	gi|1024994713|gb|ANC33500.1| glycosyltransferase 43A [Miscanthus lutarioriparius]	89.44	963	95.68	0
	c291478_g1	gi|1024994717|gb|ANC33501.1| glycosyltransferase 43B [Miscanthus lutarioriparius]	44.83	498	87.06	2.75201e-90
	c291512_g1	gi|475622791|gb|EMT31976.1| Glycosyltransferase QUASIMODO1 [Aegilops tauschii]	3.79	78	92.31	9.29007e-07
	c300844_g1	gi|922339469|ref|XP_003623219.2| group 1 family glycosyltransferase [Medicago truncatula] gi|657378366|gb|AES79437.2| group 1 family glycosyltransferase [Medicago truncatula]	4.66	72	91.67	4.11931e-12
	c303500_g1	gi|934636107|ref|NP_001152534.2| glycosyltransferase 6 [Zea mays] gi|413924975|gb|AFW64907.1| glycosyltransferase 6 [Zea mays]	44.47	651	90.32	1.29856e-131
	c314886_g1	gi|63087724|emb|CAI93177.1| glycosyltransferase [Saccharum officinarum]	17.96	204	94.12	2.12237e-32
	c328596_g1	gi|934636107|ref|NP_001152534.2| glycosyltransferase 6 [Zea mays] gi|413924975|gb|AFW64907.1| glycosyltransferase 6 [Zea mays]	15.24	219	98.63	3.07674e-43
	c328598_g1	gi|934636107|ref|NP_001152534.2| glycosyltransferase 6 [Zea mays] gi|413924975|gb|AFW64907.1| glycosyltransferase 6 [Zea mays]	15.24	219	98.63	2.19858e-42
	c328605_g1	gi|934636107|ref|NP_001152534.2| glycosyltransferase 6 [Zea mays] gi|413924975|gb|AFW64907.1| glycosyltransferase 6 [Zea mays]	15.24	219	98.63	2.06168e-42
	c334744_g1	gi|63087724|emb|CAI93177.1| glycosyltransferase [Saccharum officinarum]	56.84	636	96.7	1.05994e-133
	c334745_g1	gi|63087724|emb|CAI93177.1| glycosyltransferase [Saccharum officinarum]	19.84	222	100	6.73569e-43
	c346760_g1	gi|63087734|emb|CAI93182.1| glycosyltransferase [Sorghum bicolor]	8.61	117	84.62	1.90187e-12
	c371848_g1	gi|363543453|ref|NP_001241737.1| glycosyltransferase [Zea mays] gi|195620094|gb|ACG31877.1| glycosyltransferase [Zea mays]	6.76	117	92.31	2.22795e-15
	c378851_g1	gi|242052613|ref|XP_002455452.1| hypothetical protein SORBIDRAFT_03g011010 [Sorghum bicolor] gi|63087720|emb|CAI93175.1| glycosyltransferase [Sorghum bicolor] gi|241927427|gb|EES00572.1| hypothetical protein SORBI_003G129400 [Sorghum bicolor]	7.35	75	92	8.67334e-06
	c379578_g1	gi|670446489|ref|XP_008663454.1| PREDICTED: putative glycosyltransferase 2 [Zea mays]	27.92	222	85.14	1.066e-43
	c379698_g1	gi|666875824|ref|NP_001288054.1| calmodulin binding transcription activator 1 [Malus domestica] gi|658011149|ref|XP_008340813.1| PREDICTED: putative glycosyltransferase 2 [Malus domestica] gi|658035400|ref|XP_008353228.1| PREDICTED: putative glycosyltransferase 2 [Malus domestica] gi|658052462|ref|XP_008361964.1| PREDICTED: putative glycosyltransferase 2 [Malus domestica] gi|302398731|gb|ADL36660…	14.97	207	100	8.33061e-43
	c386963_g1	gi|63087728|emb|CAI93179.1| glycosyltransferase [Saccharum officinarum]	7.81	105	97.14	2.51469e-15
	c392547_g1	gi|670444058|ref|XP_008662468.1| PREDICTED: putative glycosyltransferase 3 [Zea mays] gi|413916114|gb|AFW56046.1| hypothetical protein ZEAMMB73_358929 [Zea mays]	17.98	246	98.78	3.23878e-51
	c396115_g1	gi|1024994737|gb|ANC33506.1| glycosyltransferase 43G [Miscanthus lutarioriparius]	20.1	246	91.46	2.33661e-42
	c396500_g1	gi|242052299|ref|XP_002455295.1| hypothetical protein SORBIDRAFT_03g007960 [Sorghum bicolor] gi|56409858|emb|CAI30077.1| glycosyltransferase [Sorghum bicolor] gi|241927270|gb|EES00415.1| hypothetical protein SORBI_003G095200 [Sorghum bicolor]	5.46	87	89.66	1.90254e-06
	c400243_g1	gi|703146135|ref|XP_010108713.1| Putative glycosyltransferase 3 [Morus notabilis] gi|587933023|gb|EXC20024.1| Putative glycosyltransferase 3 [Morus notabilis]	19.6	264	92.05	2.40597e-52
	c401211_g1	gi|657988932|ref|XP_008386651.1| PREDICTED: putative glycosyltransferase 2 [Malus domestica]	17.82	240	100	3.29207e-51
